# Supplementary material for: Synthesis and hLDH Inhibitory Activity of Analogues to Natural Products with 2,8-Dioxabicyclo[3.3.1]nonane Scaffold
Source: MDPI journal article supplement (doi:10.3390/ijms24129925), 2023-06-08
Supplement: s1 [file s1]

# Synthesis and *h*LDH inhibitory activity of analogues to natural products with 2,8-dioxabicyclo[3.3.1]nonane scaffold

Sofia Salido, Alfonso Alejo-Armijo\*, Joaquin Altarejos

*Departamento de Química Inorgánica y Orgánica, Facultad de Ciencias Experimentales,  
Universidad de Jaén, Campus de Excelencia Internacional Agroalimentario ceiA3, 23071 Jaén,  
Spain. aalejo@ujaen.es*

## Table of Contents

|                                                                                     |     |
|-------------------------------------------------------------------------------------|-----|
| 1. NMR spectra                                                                      | S1  |
| 2. HPLC chromatograms                                                               | S42 |
| 3. Quiral HPLC chromatograms                                                        | S57 |
| 4. Dose response curves against <i>h</i> LDHA and <i>h</i> LDHB                     | S59 |
| 5. Dose response curves against <i>h</i> LDHA and <i>h</i> LDHB of pure enantiomers | S92 |
| 6. Lineweaver-Burk double reciprocal graphs for pure enantiomers on <i>h</i> LDHA   | S95 |
| 7. Values of $V_{\max}$ and $K_M$ for pure enantiomers on <i>h</i> LDHA             | S97 |

## 1. NMR spectra

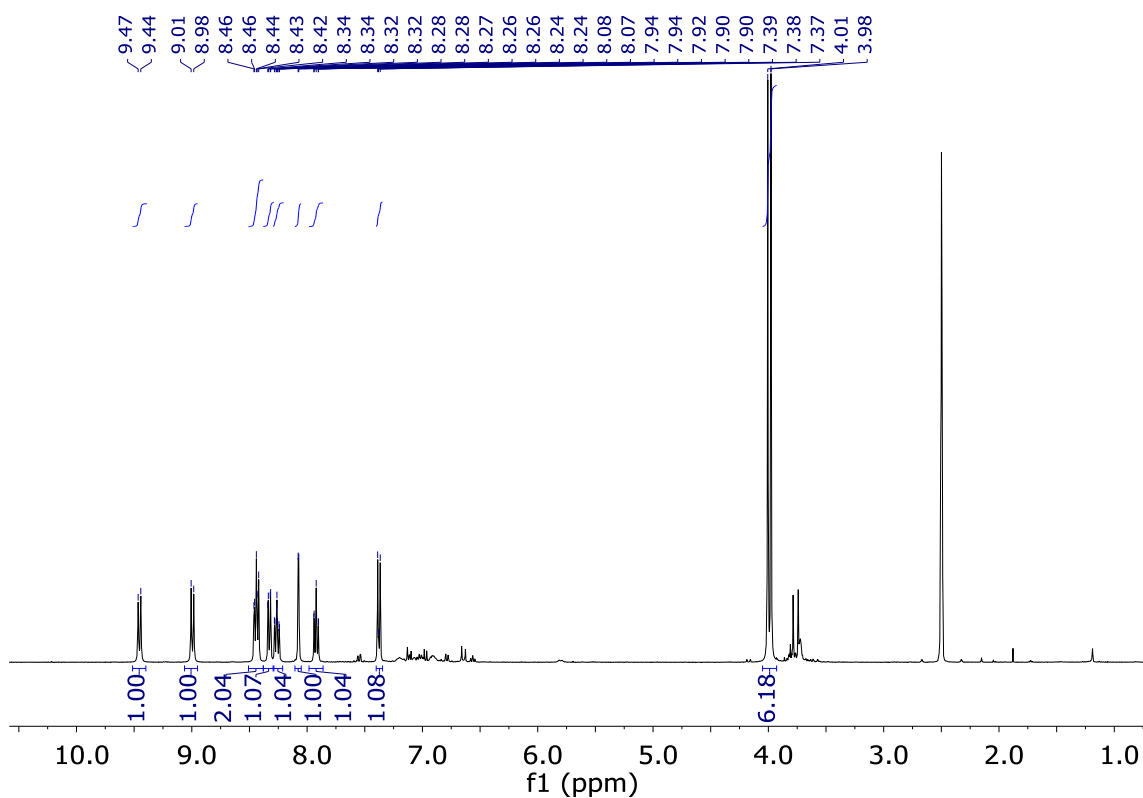

**Figure S1.** <sup>1</sup>H-NMR spectrum of compound **30** (flavylium species) in DMSO:TFA 9:1.

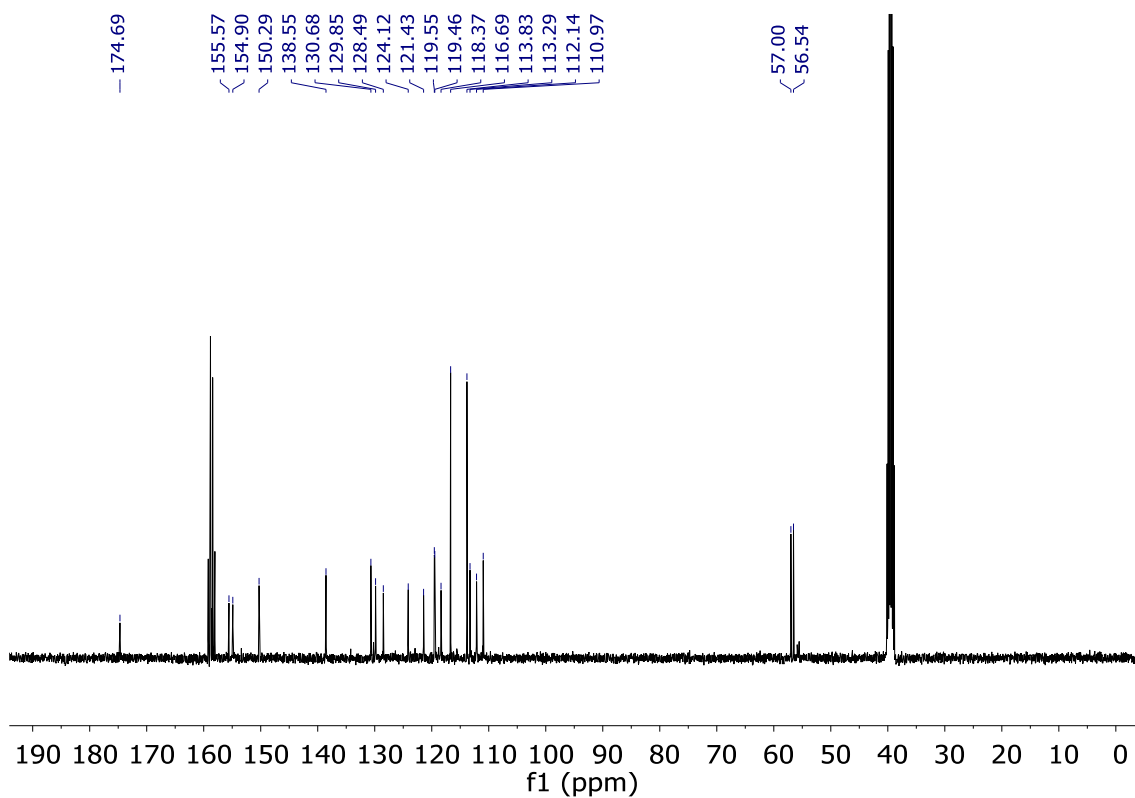

**Figure S2.** <sup>13</sup>C-NMR spectrum of **30** (flavylium species) in DMSO:TFA 9:1.

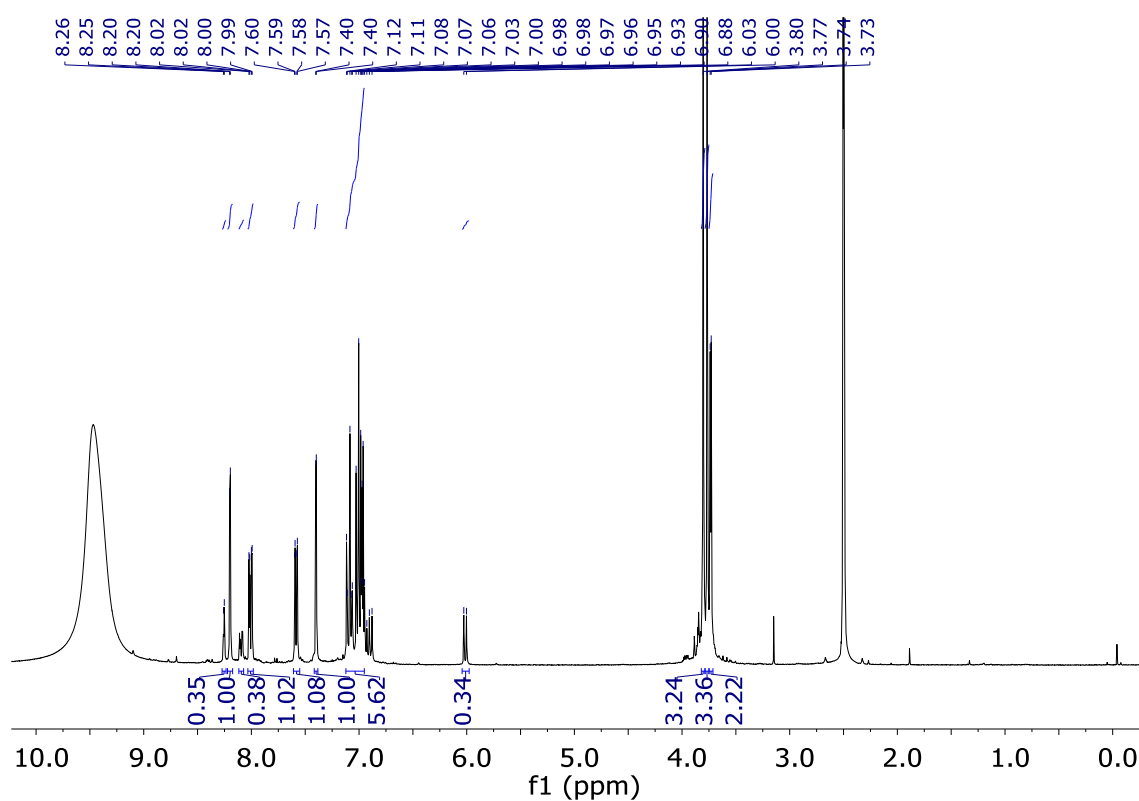

**Figure S3.** <sup>1</sup>H-NMR spectrum of compound **31** (*trans*-chalcone species) in DMSO:TFA 9:1.

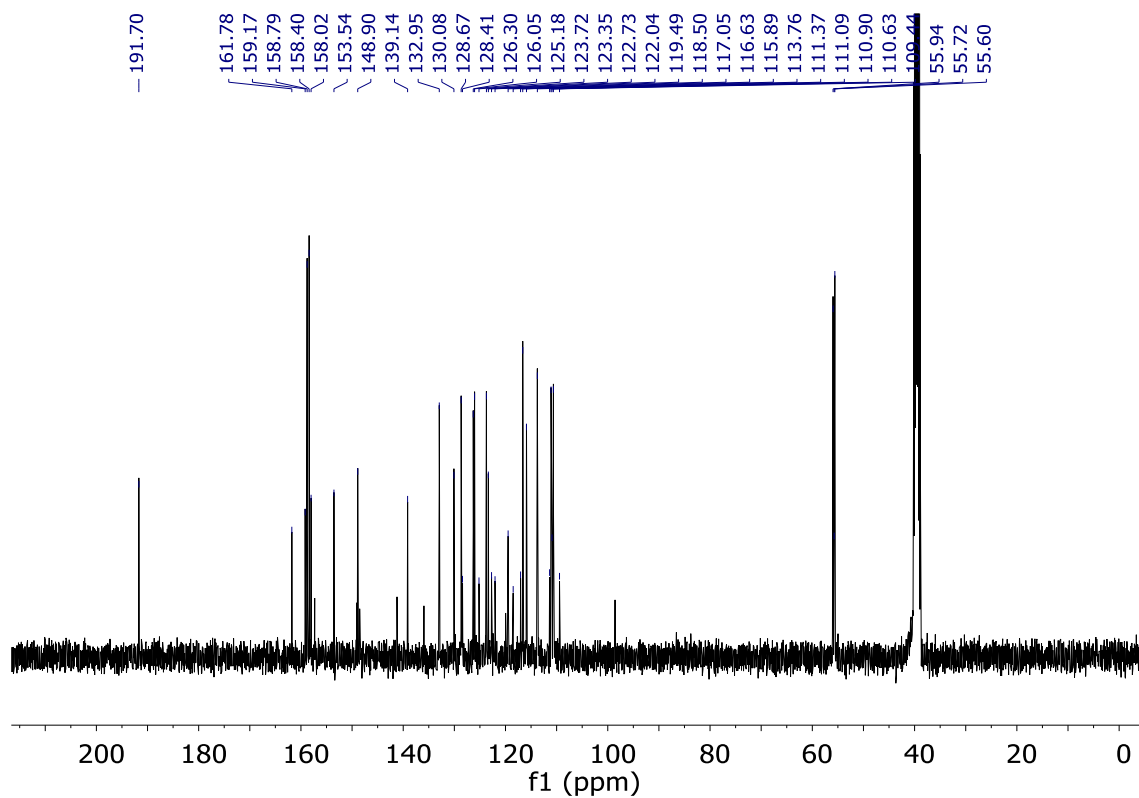

**Figure S4** <sup>13</sup>C-NMR spectrum of compound **31** (*trans*-chalcone species) in DMSO:TFA 9:1.

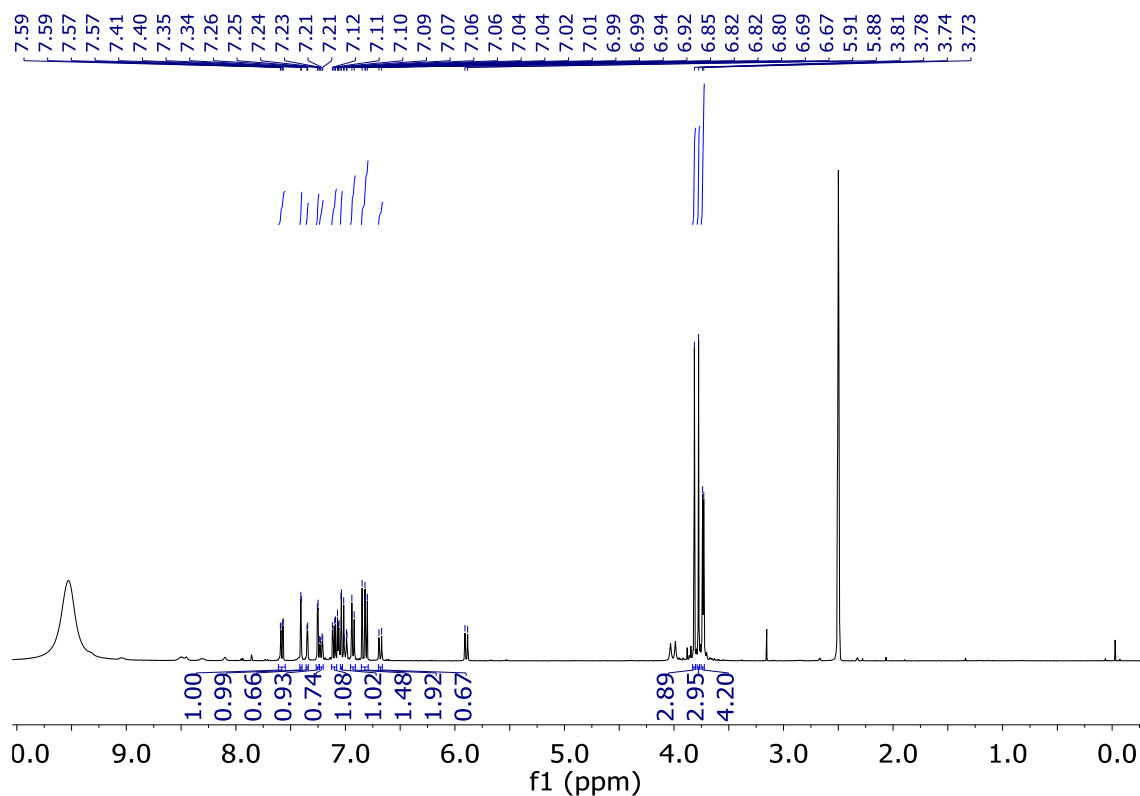

**Figure S5.** <sup>1</sup>H-NMR spectrum of compound **32** (*trans*-chalcone species) in DMSO:TFA 9:1.

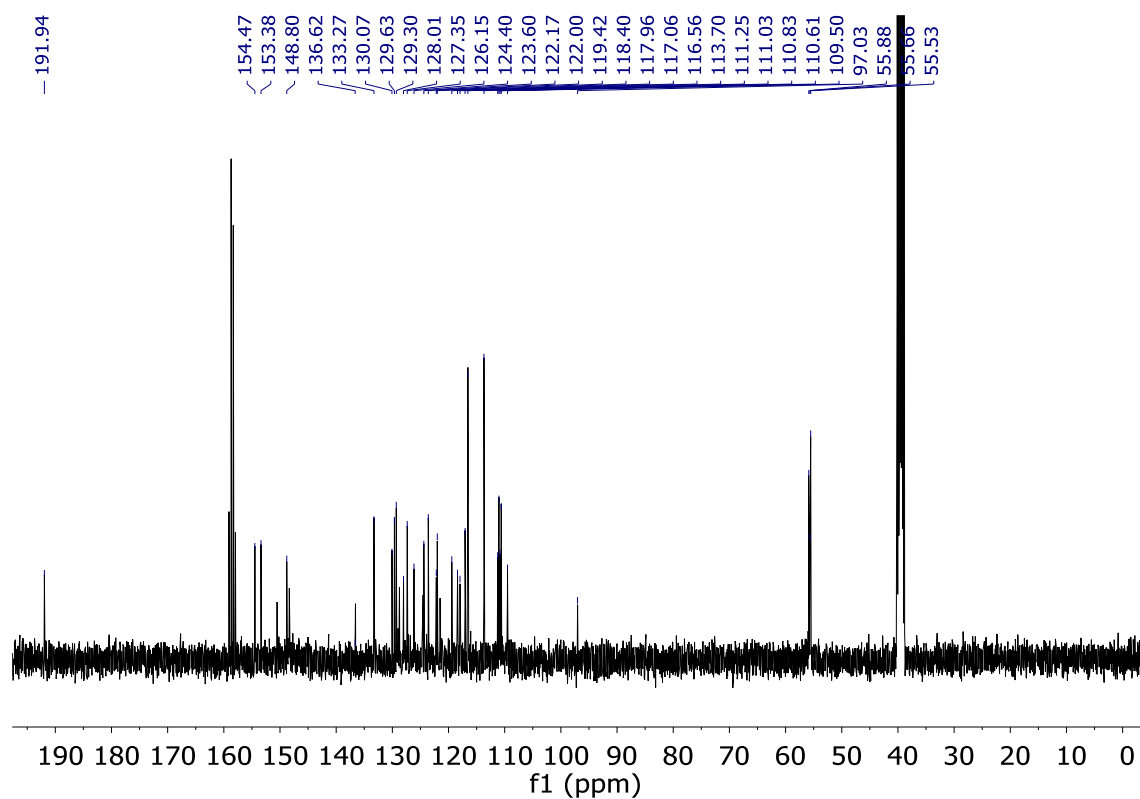

**Figure S6.** <sup>13</sup>C-NMR spectrum of compound **32** (*trans*-chalcone species) in DMSO:TFA 9:1.



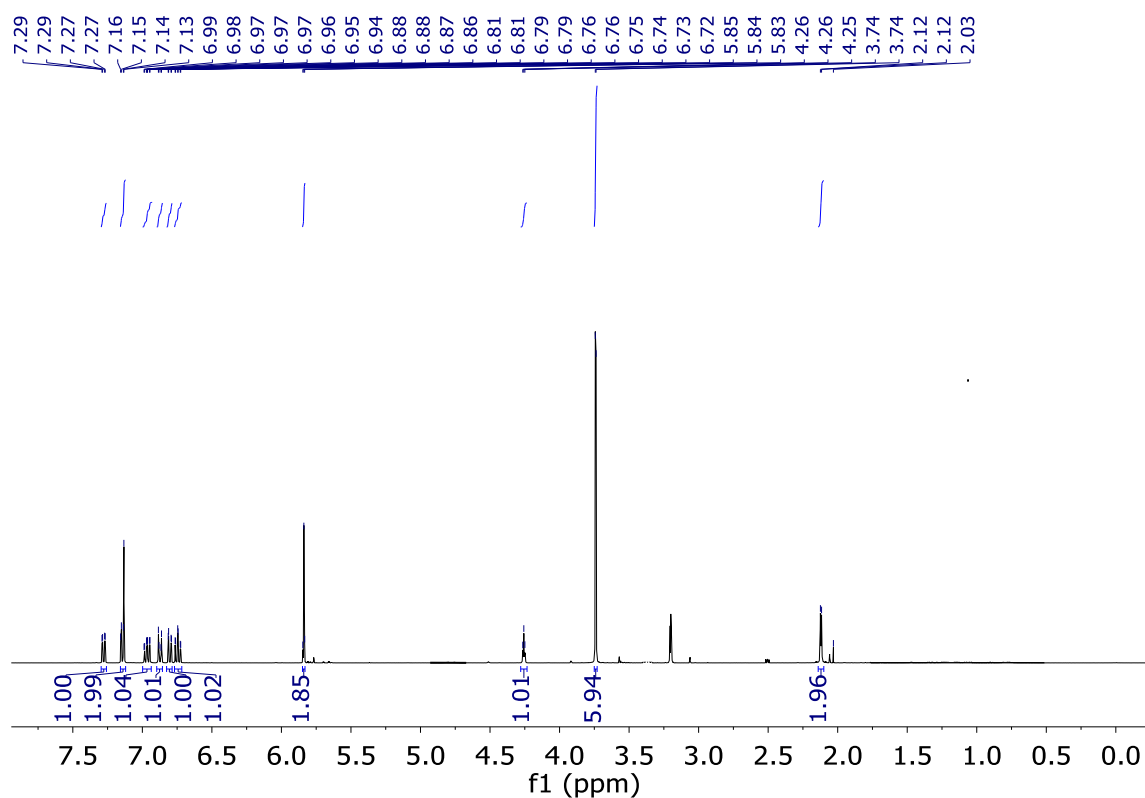

**Figure S7.**  $^1\text{H}$ -NMR spectrum of compound **42** in MeOD

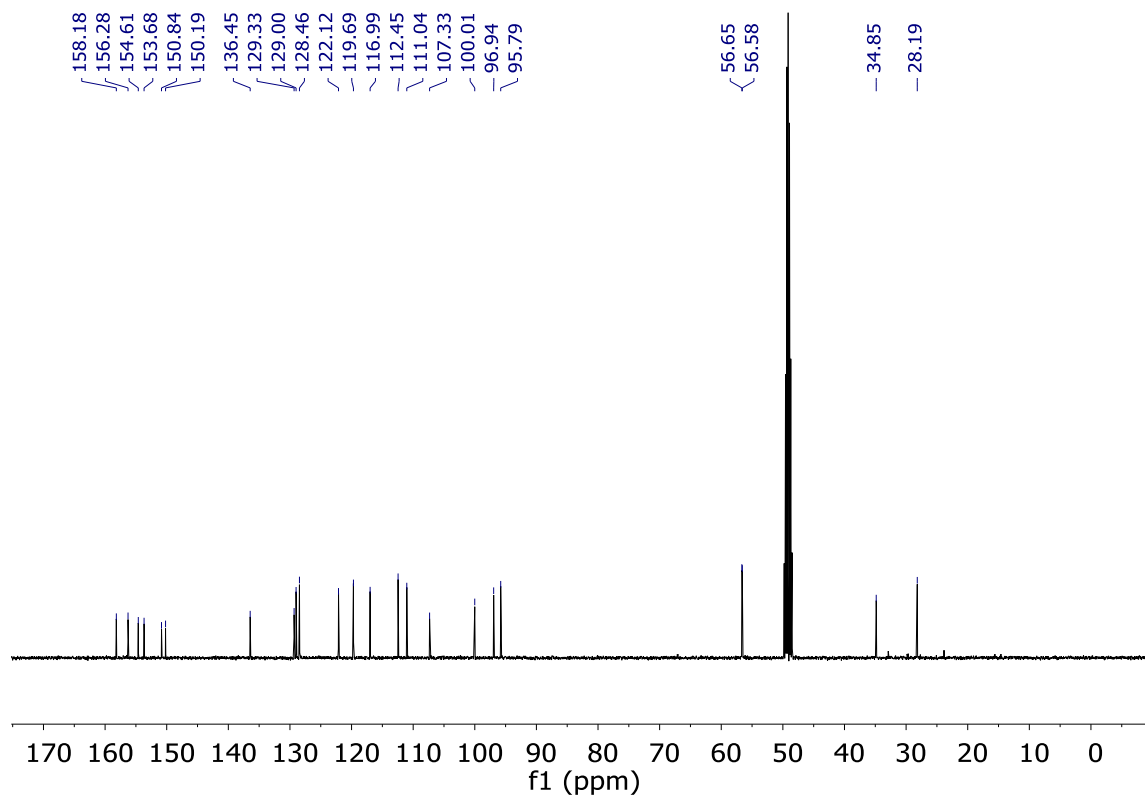

**Figure S8.**  $^{13}\text{C}$ -NMR spectrum of compound **42** in MeOD

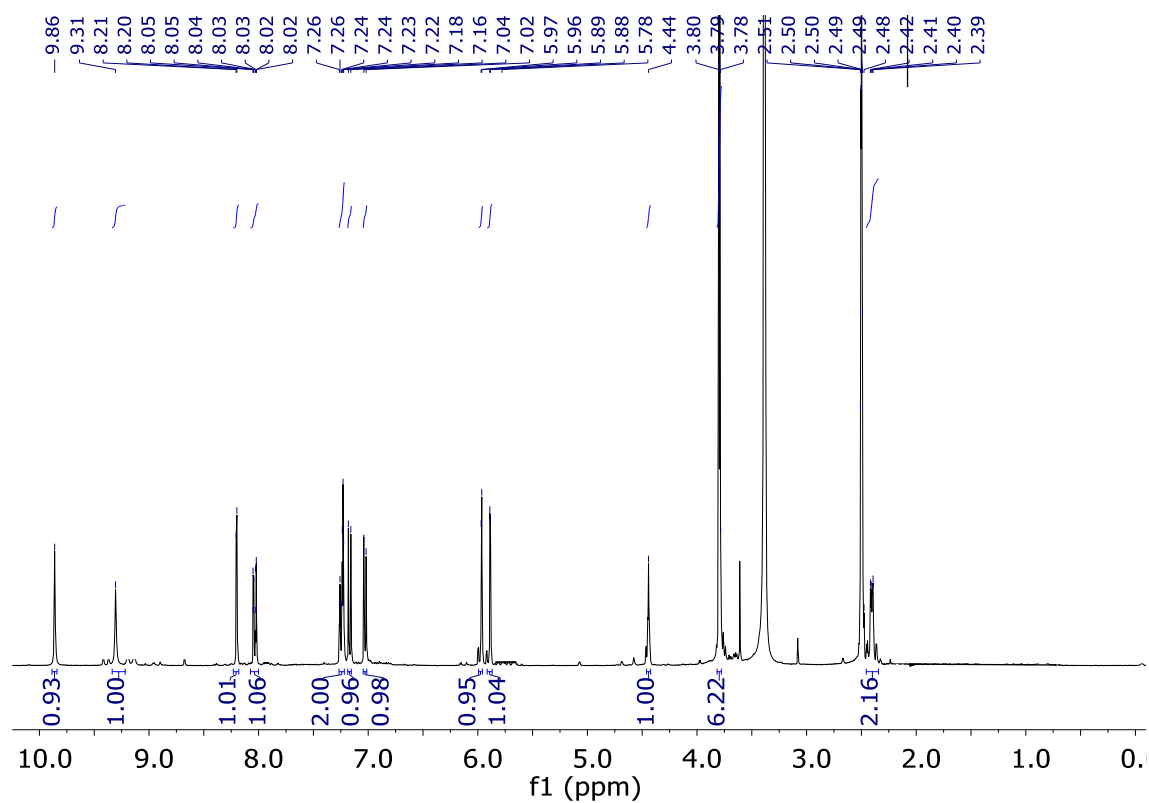

**Figure S9.**  $^1\text{H}$ -NMR spectrum of compound **43** in  $\text{DMSO}-d_6$

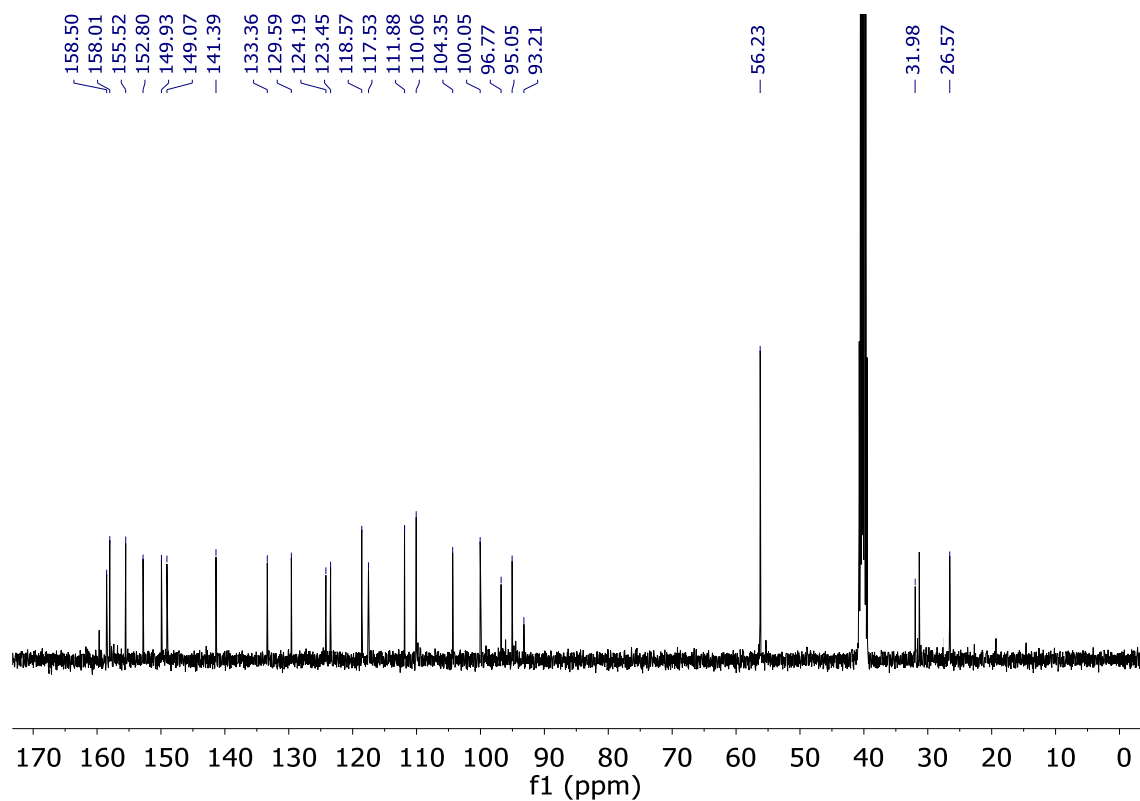

**Figure S10.**  $^{13}\text{C}$ -NMR spectrum of compound **43** in  $\text{DMSO}-d_6$

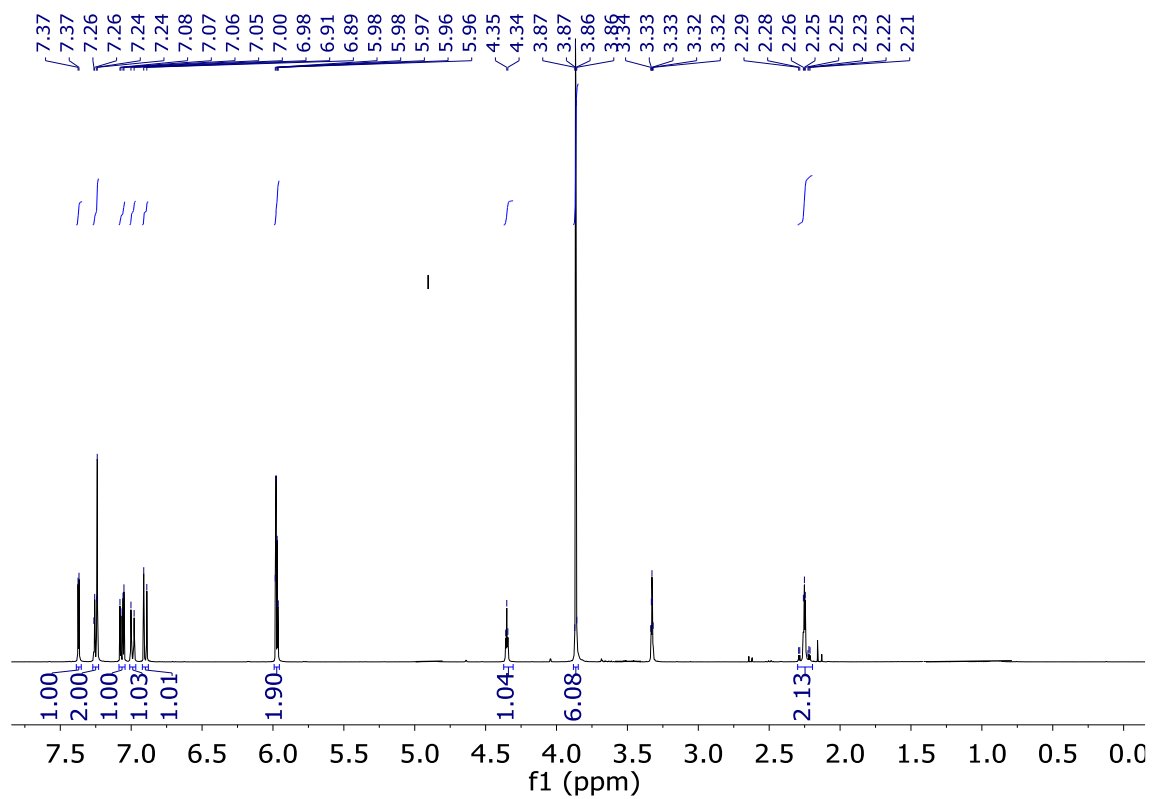

**Figure S11.** <sup>1</sup>H-NMR spectrum of compound **44** in MeOD.

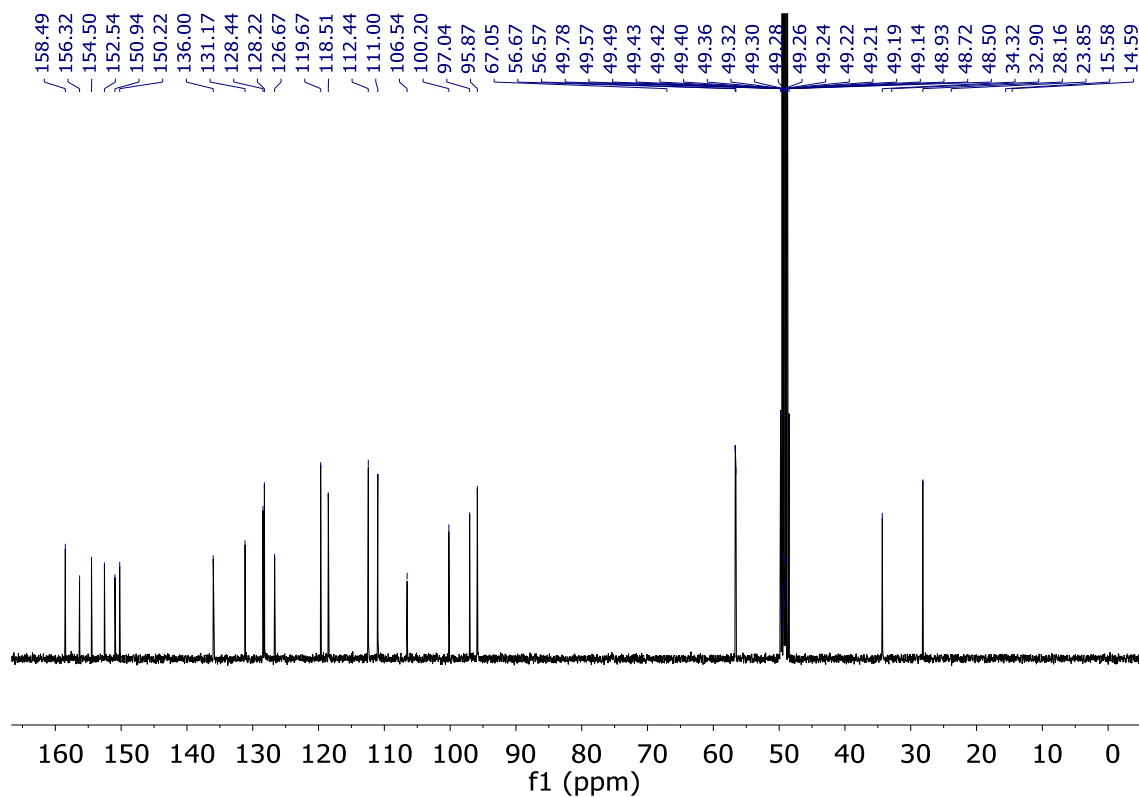

**Figure S12.** <sup>13</sup>C-NMR spectrum of compound **44** in MeOD.



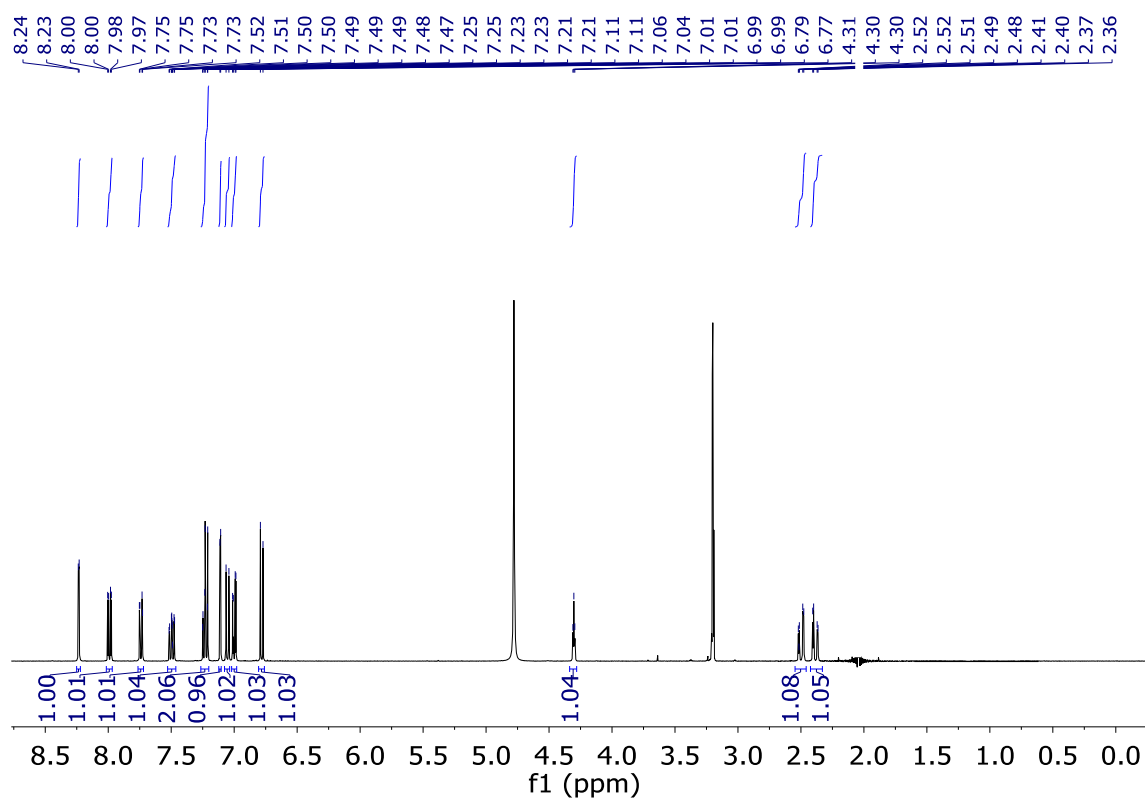

**Figure S15.** <sup>1</sup>H-NMR spectrum of compound **46** in MeOD

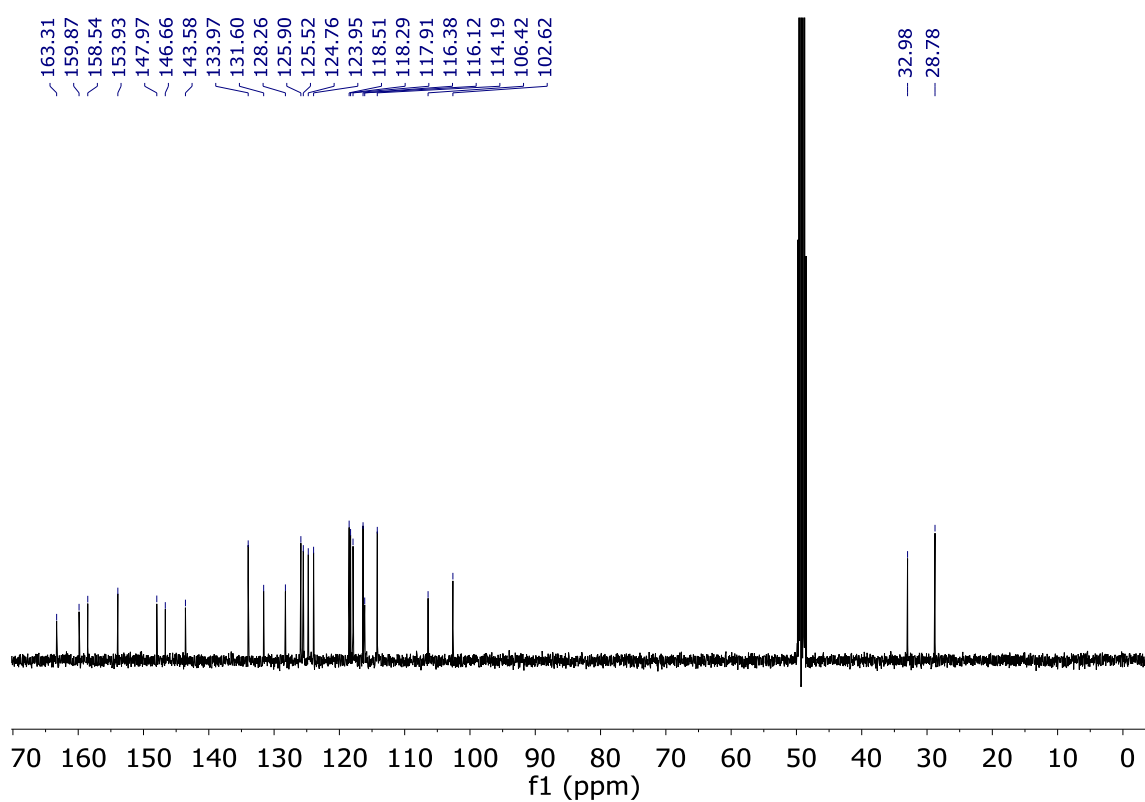

**Figure S16.** <sup>13</sup>C-NMR spectrum of compound **46** in MeOD

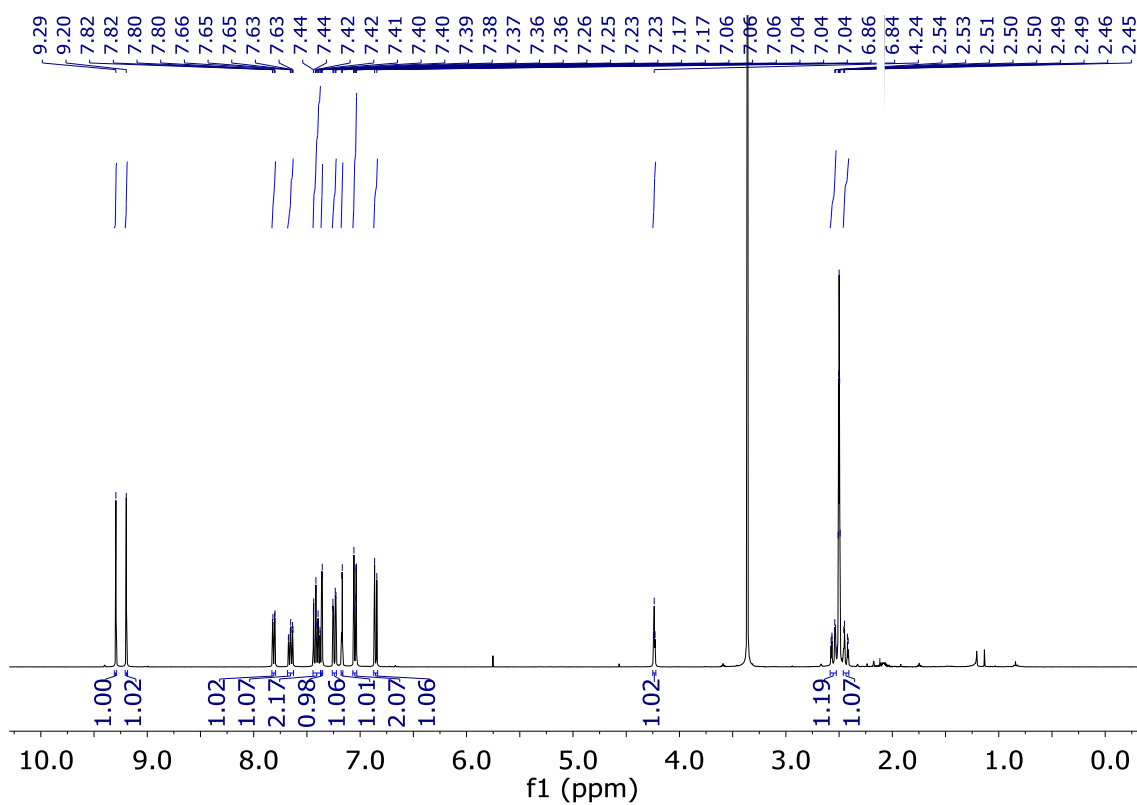

**Figure S17.**  $^1\text{H}$ -NMR spectrum of compound **47** in  $\text{DMSO}-d_6$

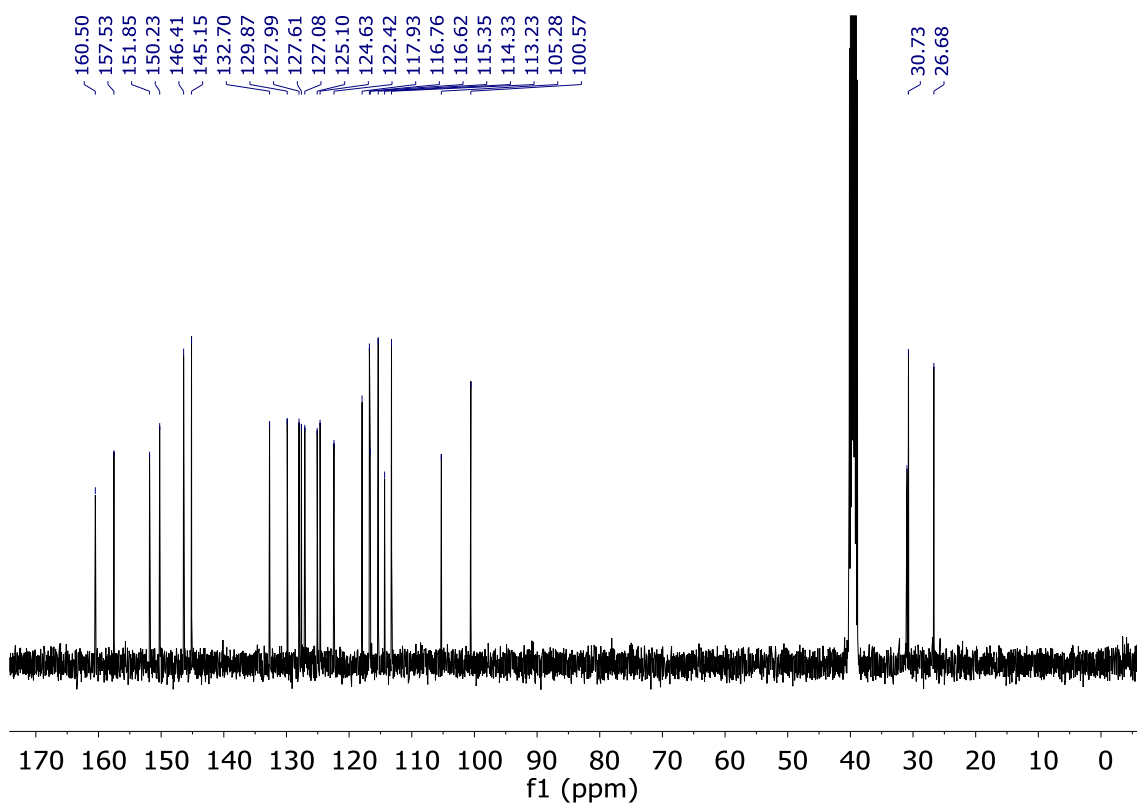

**Figure S18.**  $^{13}\text{C}$ -NMR spectrum of compound **47** in  $\text{DMSO}-d_6$

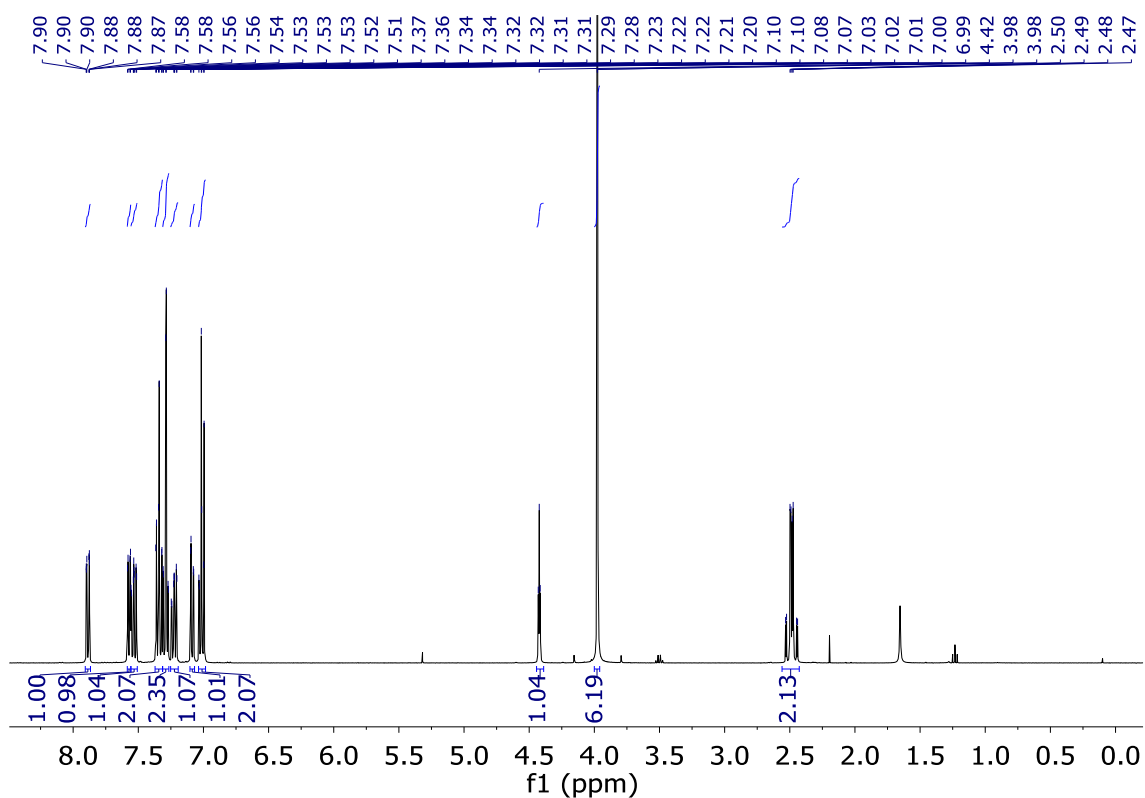

**Figure S19.** <sup>1</sup>H-NMR spectrum of compound **48** in CDCl<sub>3</sub>

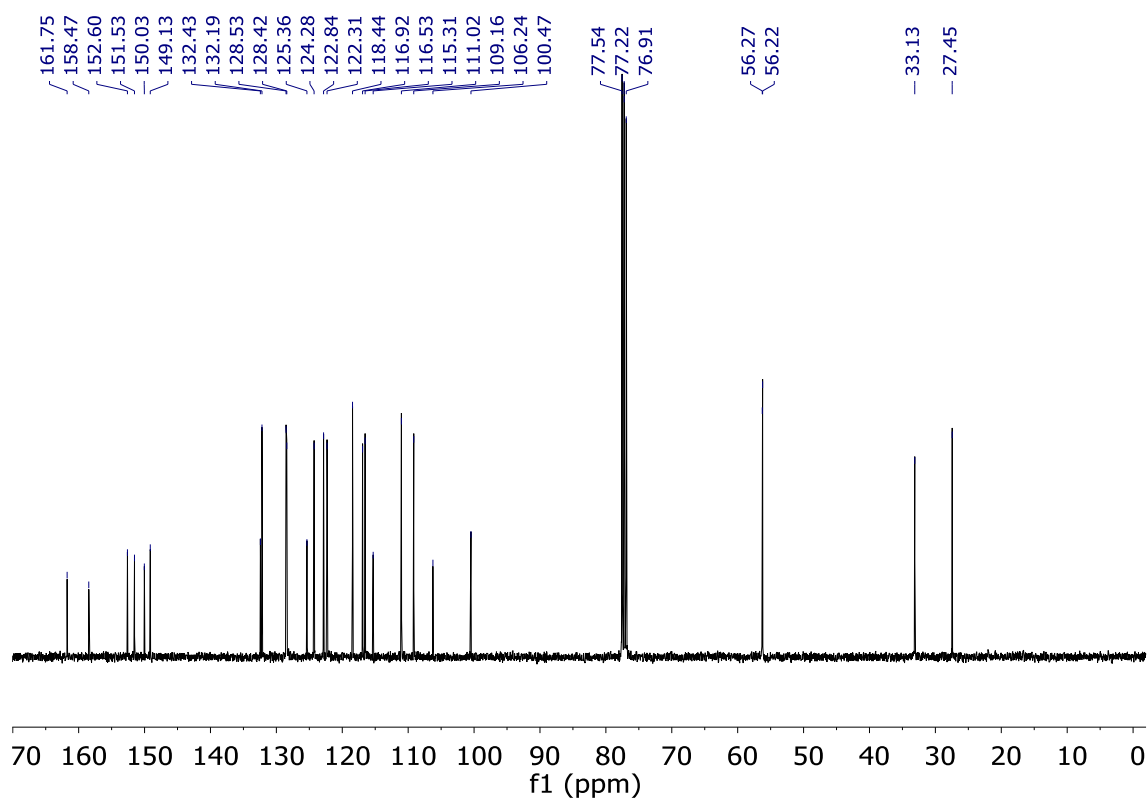

**Figure S20.** <sup>13</sup>C-NMR spectrum of compound **48** in CDCl<sub>3</sub>

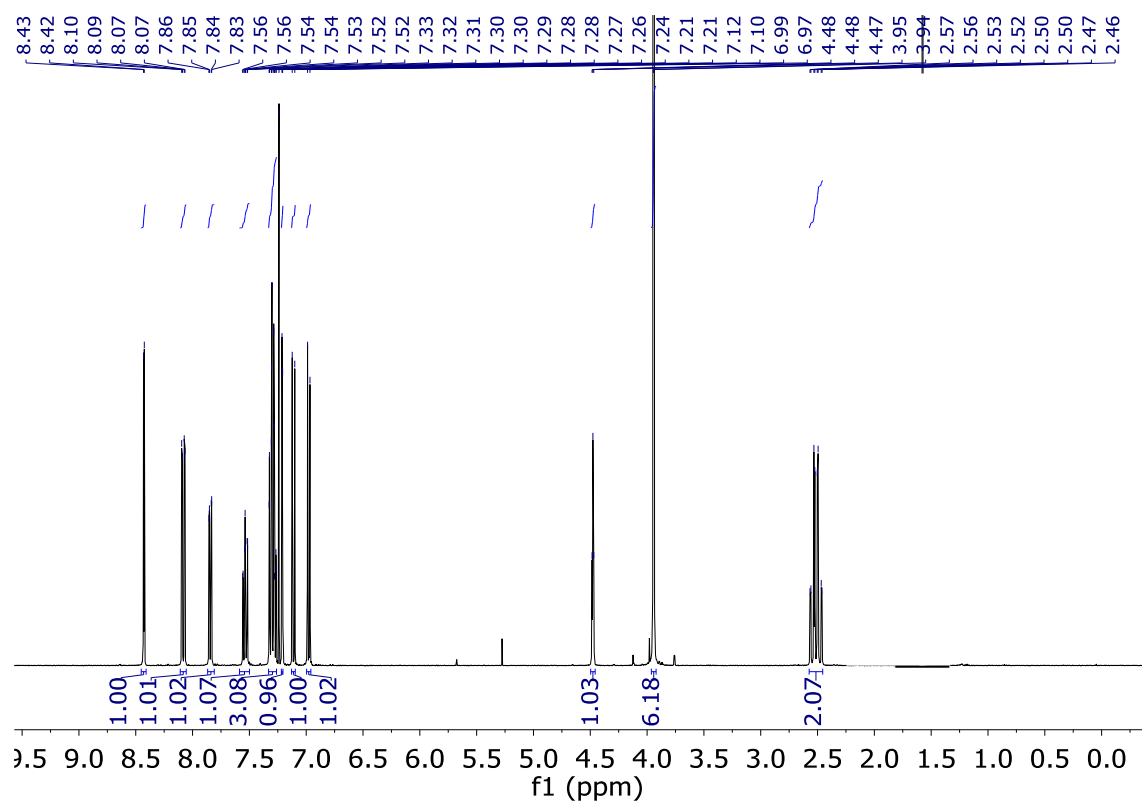

**Figure S21.** <sup>1</sup>H-NMR spectrum of compound **49** in CDCl<sub>3</sub>

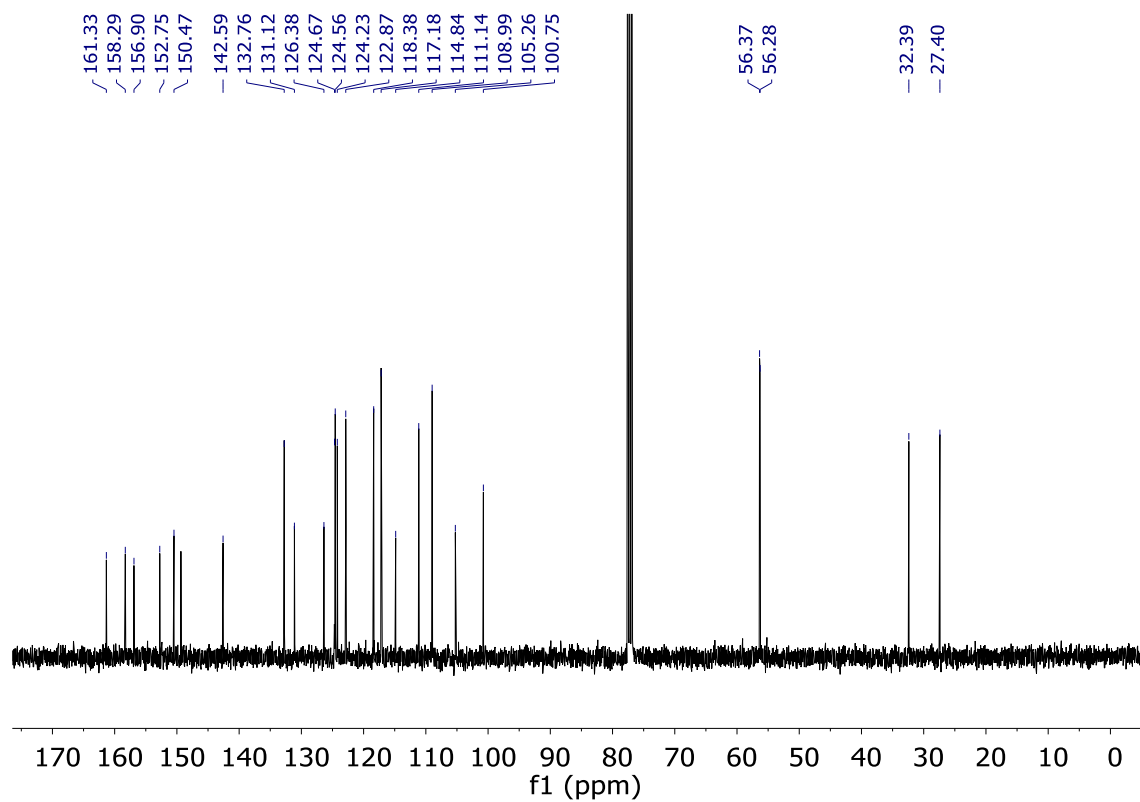

**Figure S22.** <sup>13</sup>C-NMR spectrum of compound **49** in CDCl<sub>3</sub>



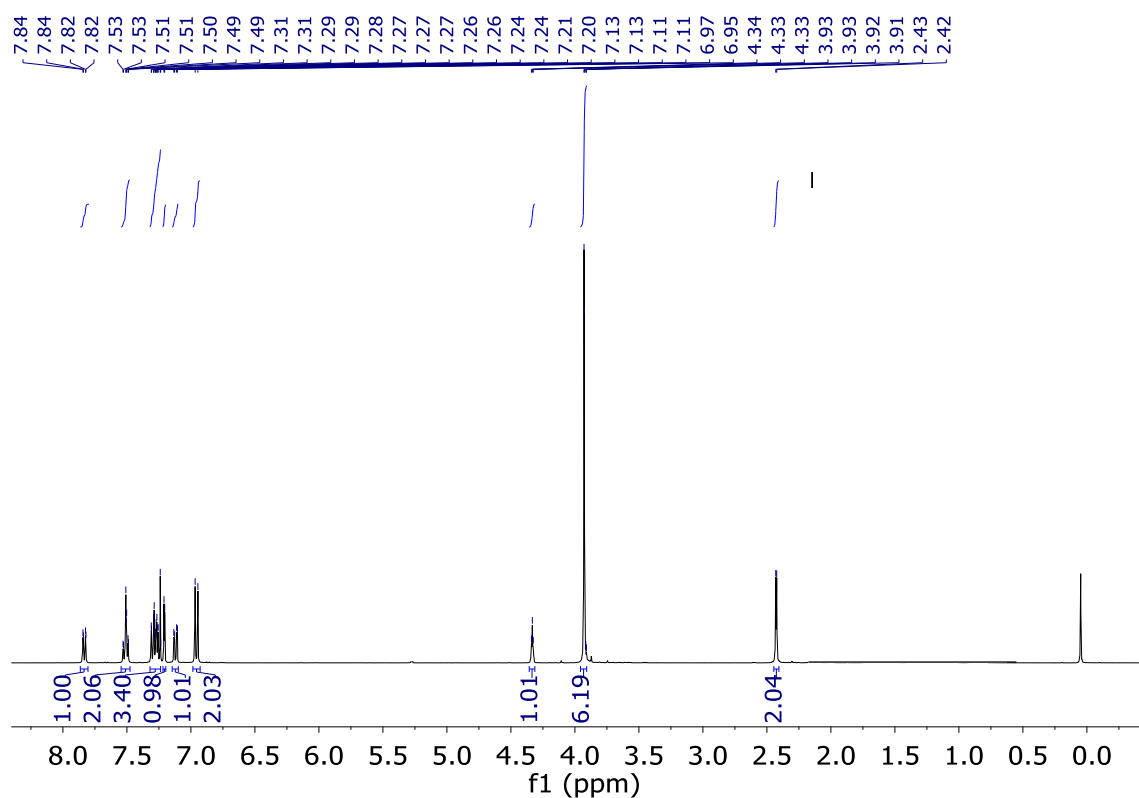

**Figure S23.** <sup>1</sup>H-NMR spectrum of compound **50** in CDCl<sub>3</sub>.

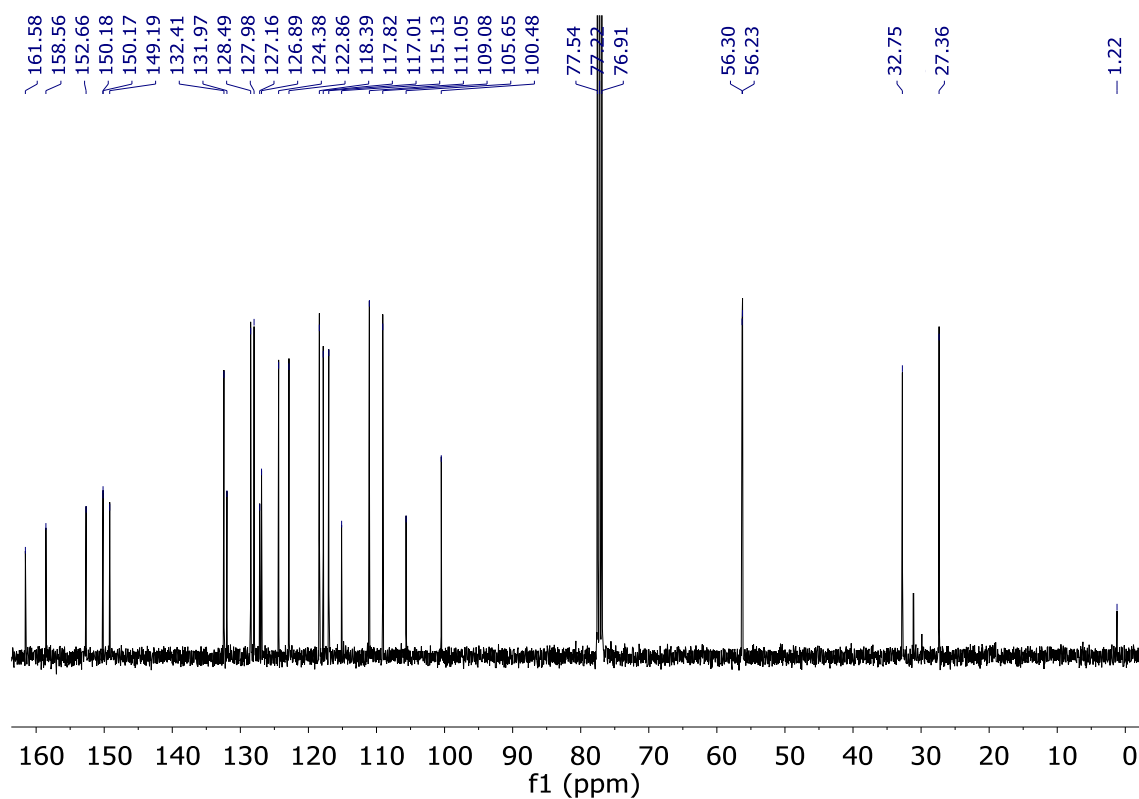

**Figure S24.** <sup>13</sup>C-NMR spectrum of compound **50** in CDCl<sub>3</sub>.

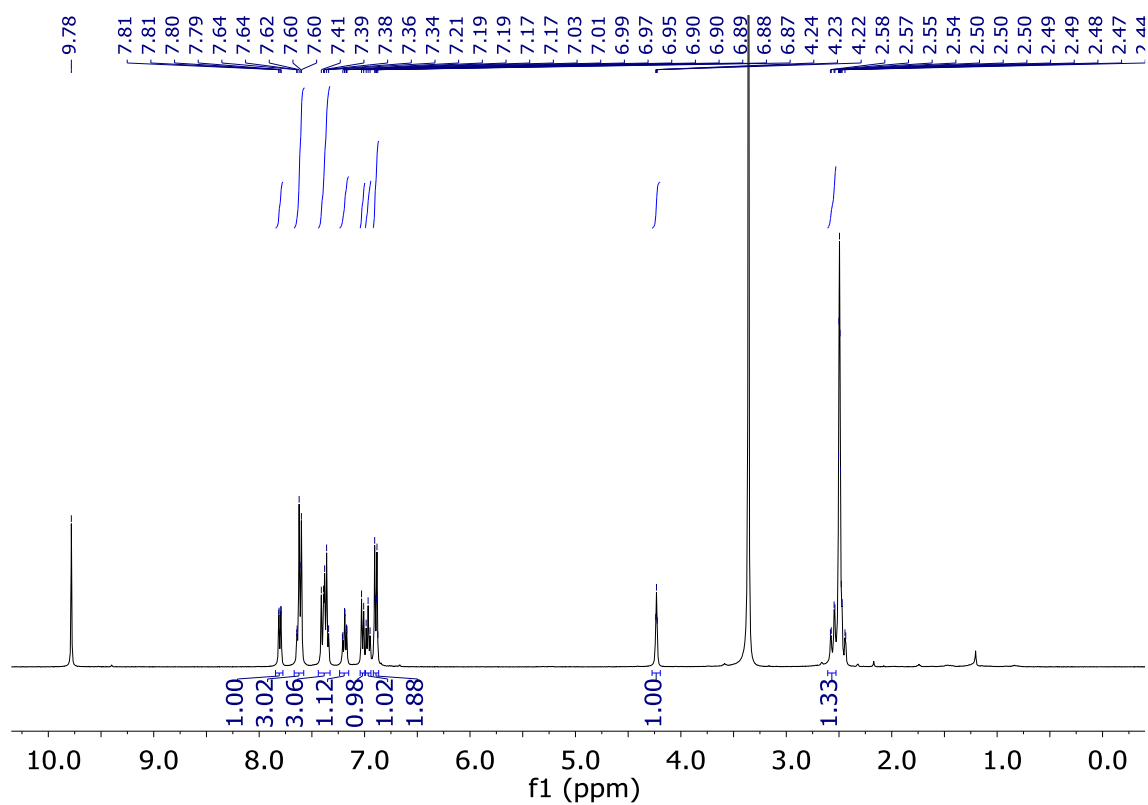

**Figure S25.**  $^1\text{H}$ -NMR spectrum of compound **51** in  $\text{DMSO}-d_6$

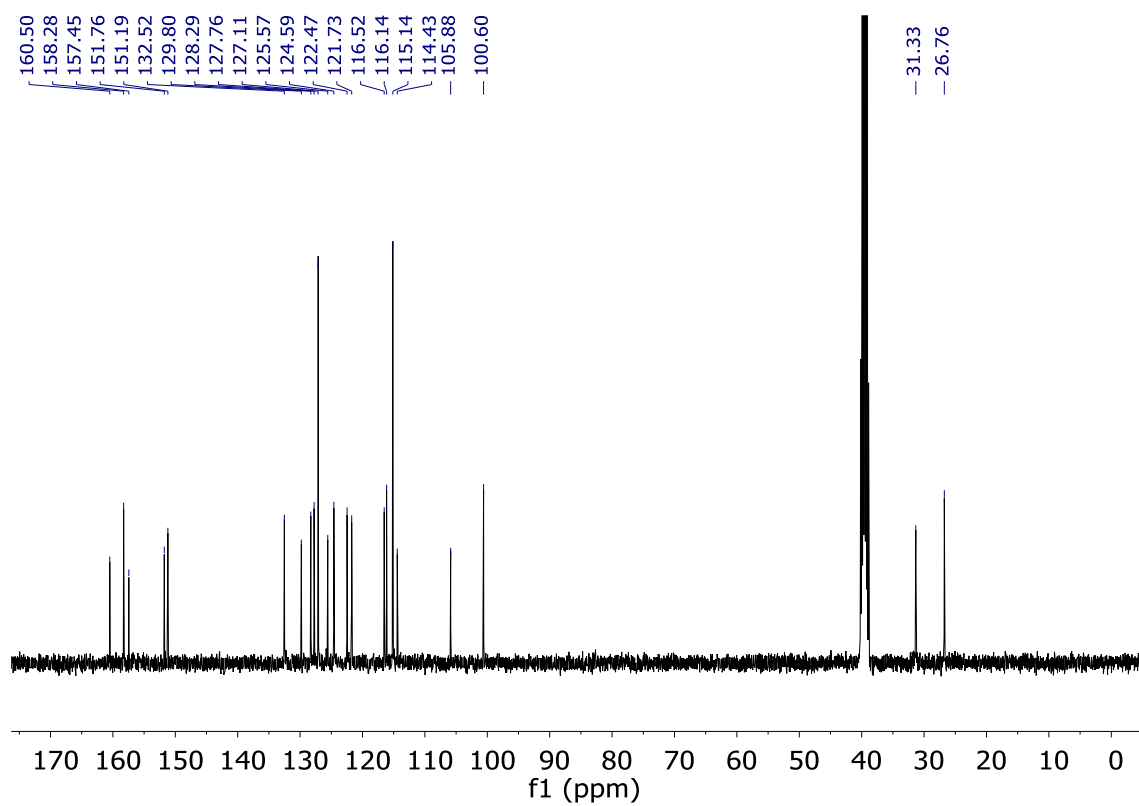

**Figure S26.**  $^{13}\text{C}$ -NMR spectrum of compound **51** in  $\text{DMSO}-d_6$

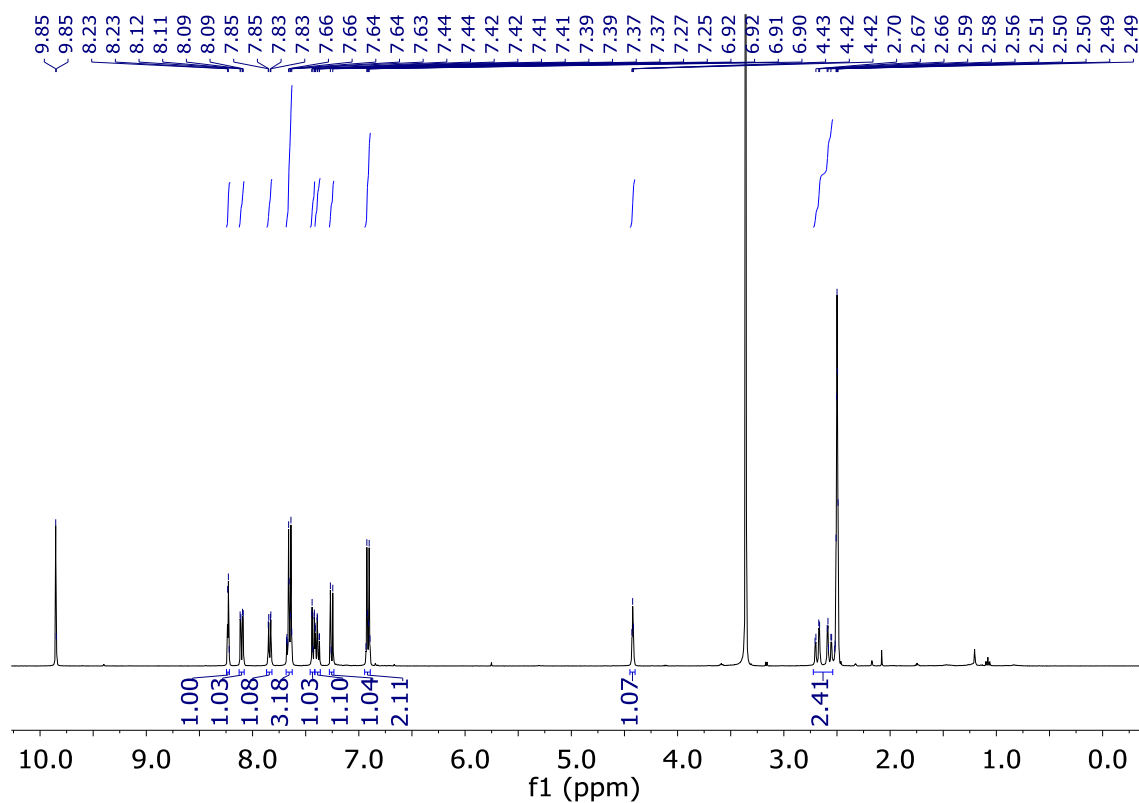

**Figure S27.**  $^1\text{H}$ -NMR spectrum of compound **52** in  $\text{DMSO}-d_6$

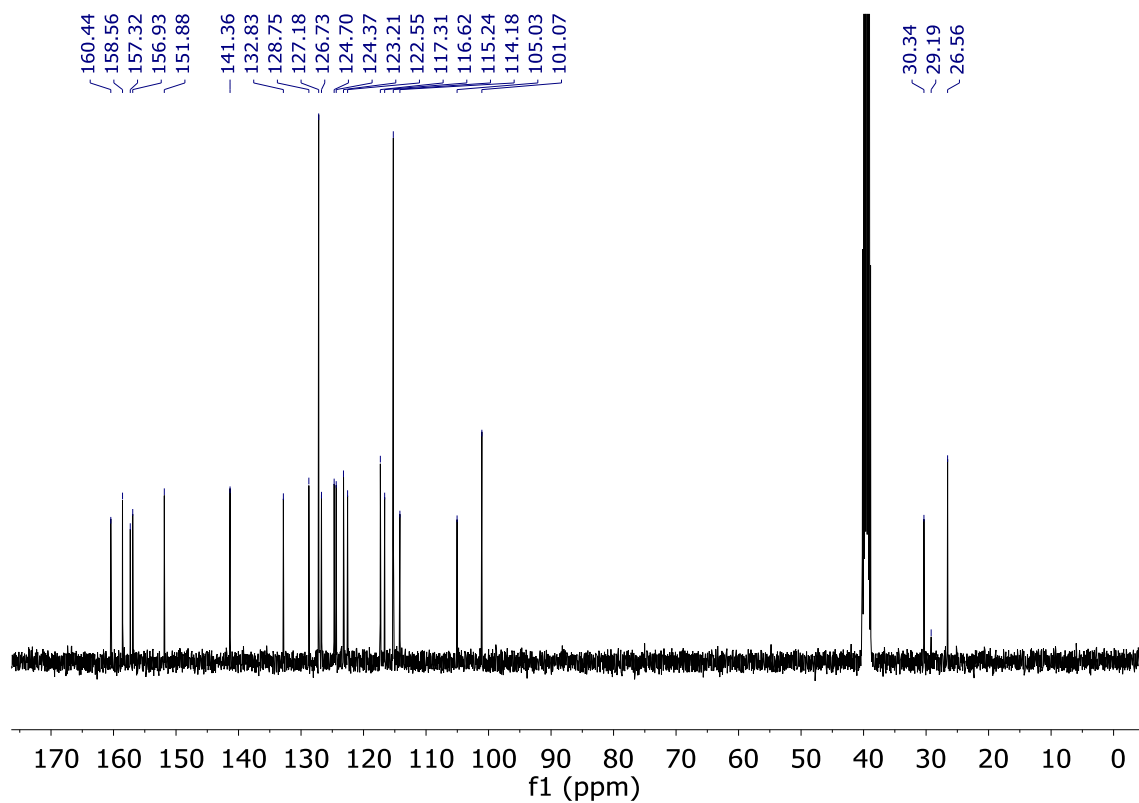

**Figure S28.**  $^{13}\text{C}$ -NMR spectrum of compound **52** in  $\text{DMSO}-d_6$

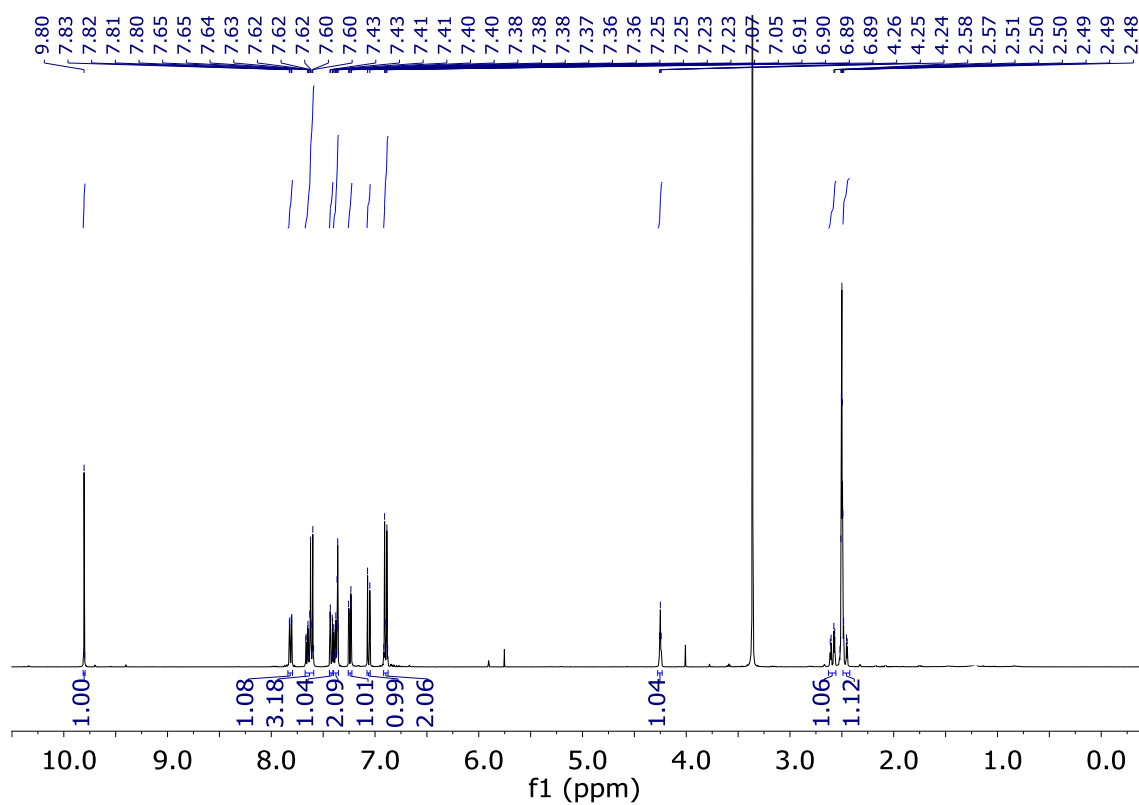

**Figure S29.**  $^1\text{H}$ -NMR spectrum of compound **53** in  $\text{DMSO}-d_6$

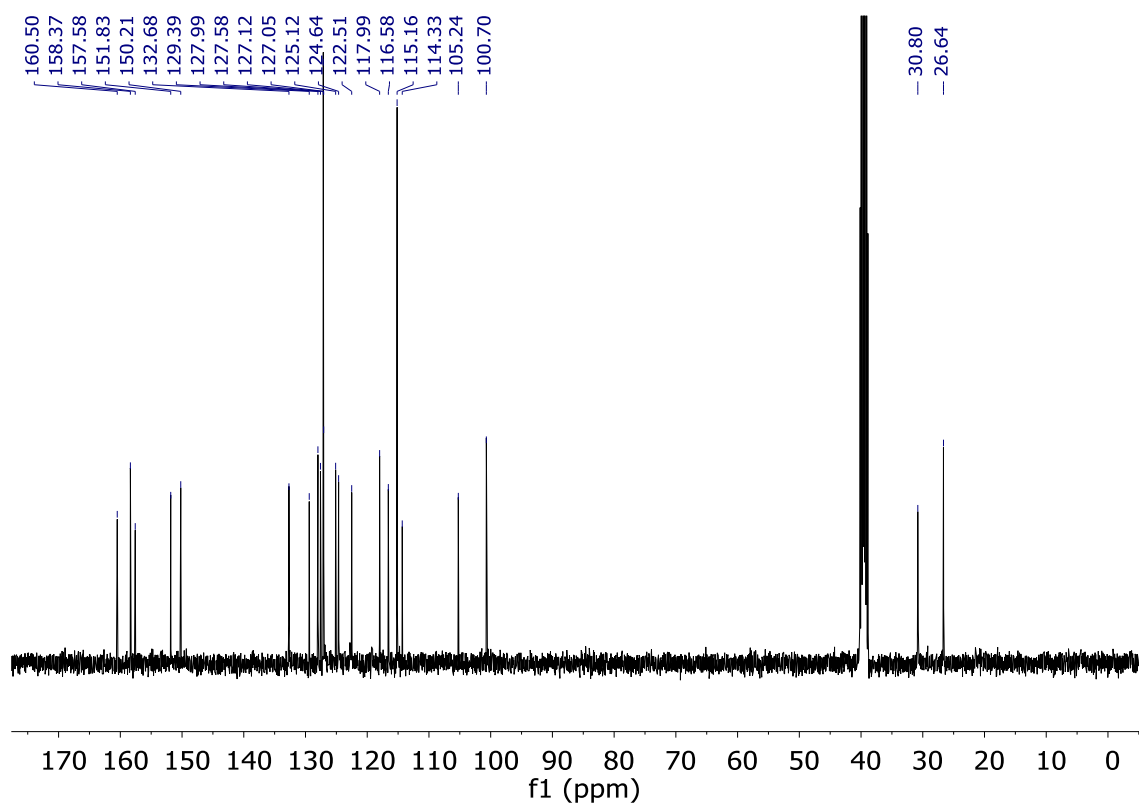

**Figure S30.**  $^{13}\text{C}$ -NMR spectrum of compound **53** in  $\text{DMSO}-d_6$

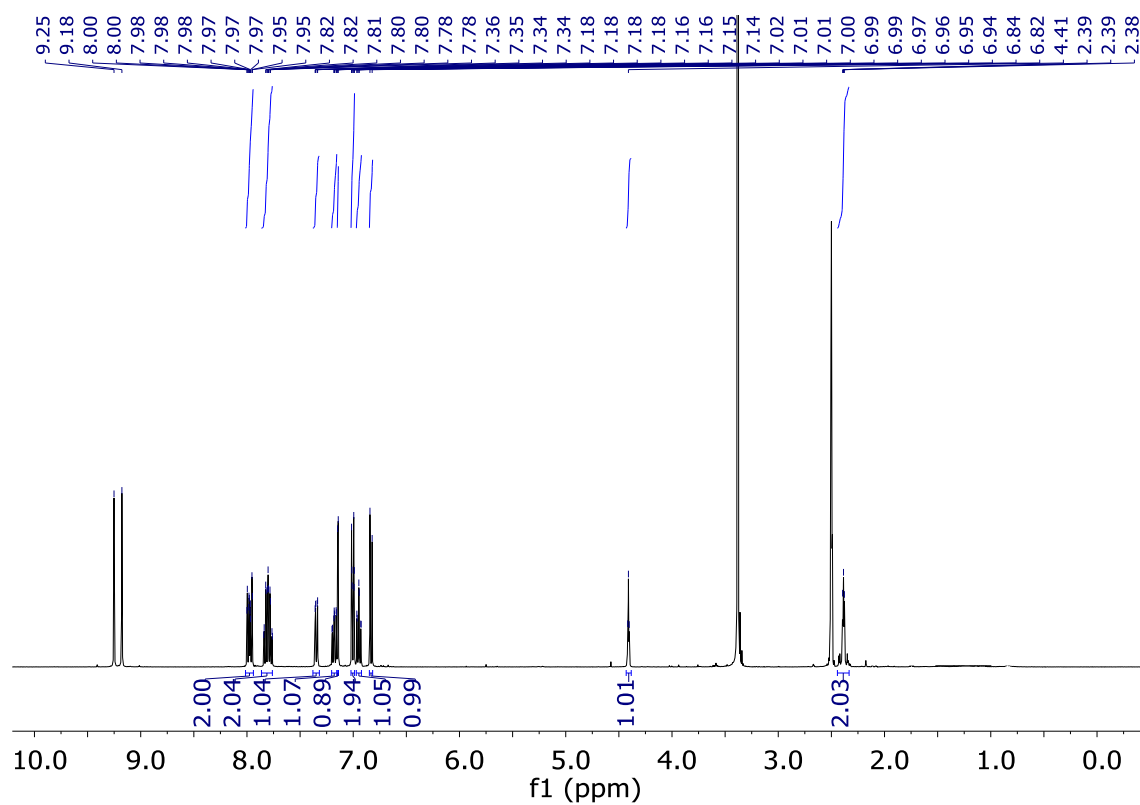

**Figure S31.**  $^1\text{H}$ -NMR spectrum of compound **54** in  $\text{DMSO}-d_6$

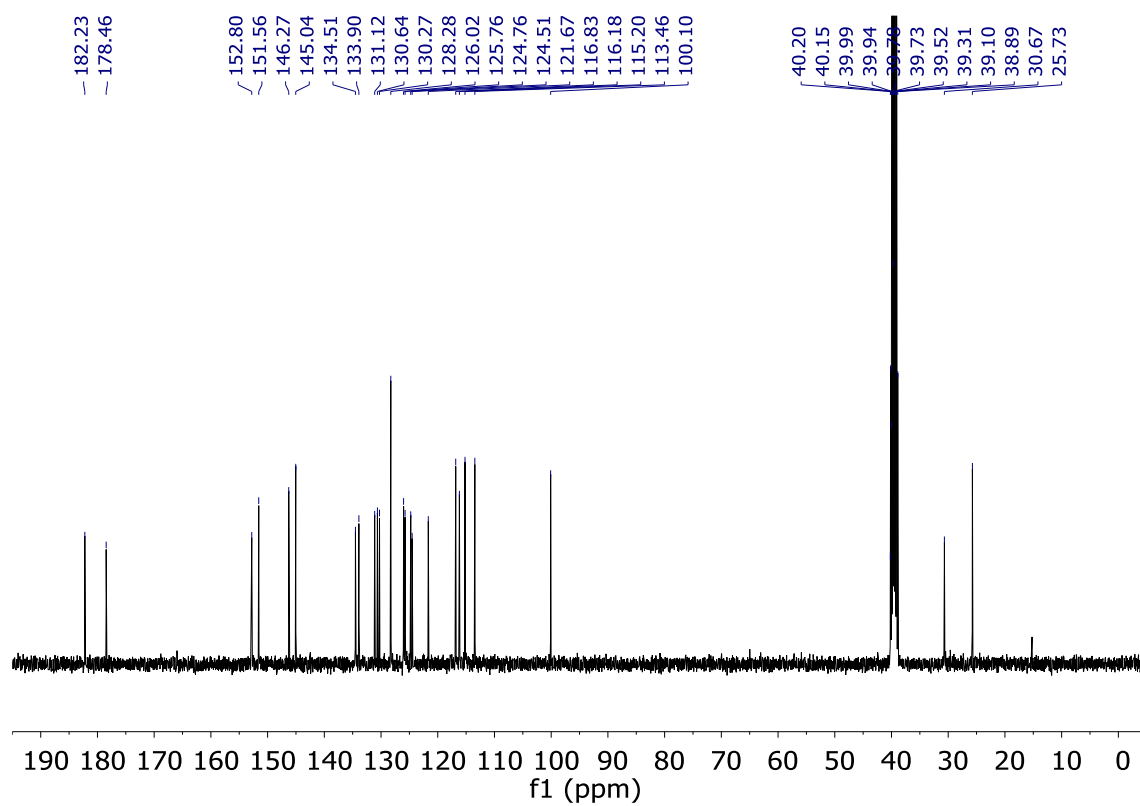

**Figure S32.**  $^{13}\text{C}$ -NMR spectrum of compound **54** in  $\text{DMSO}-d_6$

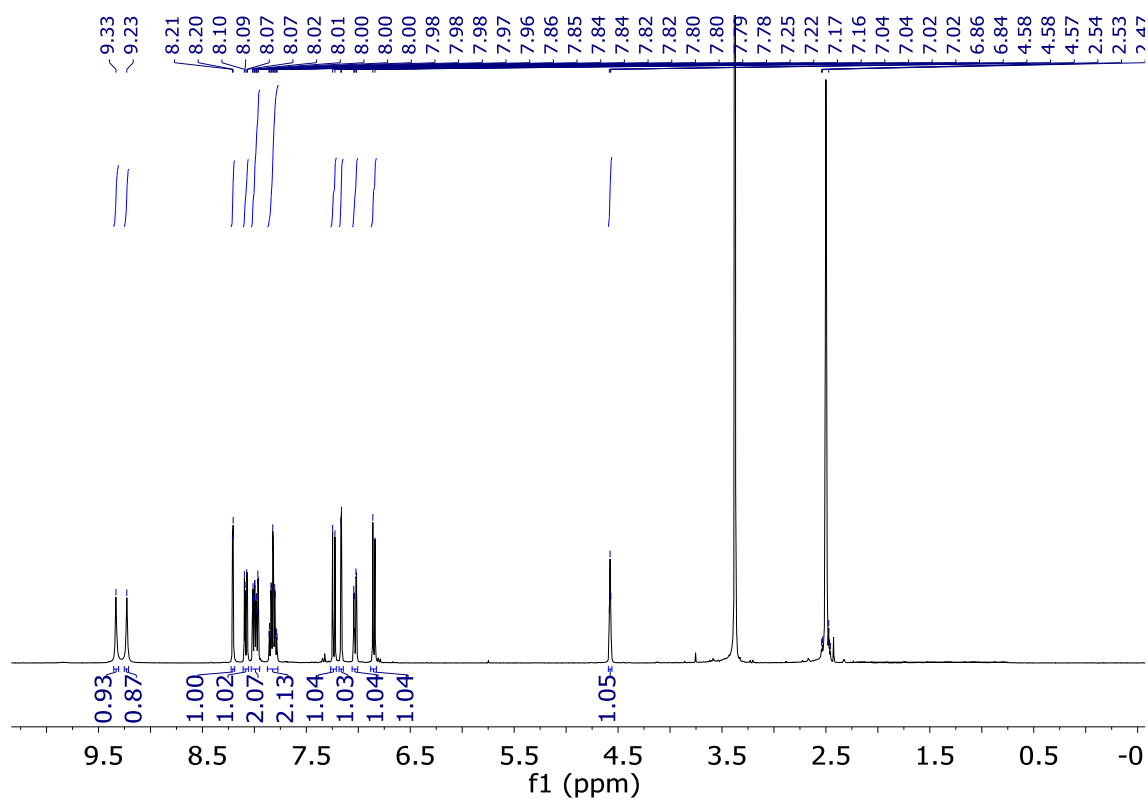

**Figure S33.**  $^1\text{H}$ -NMR spectrum of compound **55** in  $\text{DMSO-}d_6$

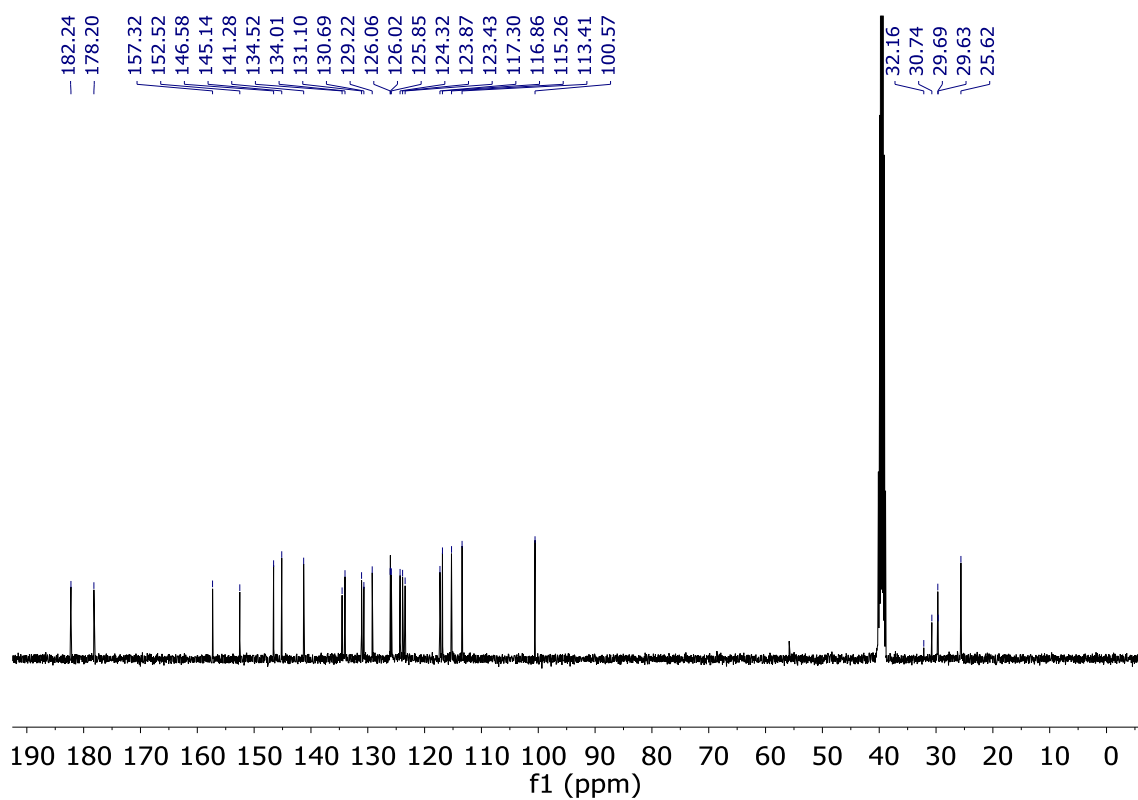

**Figure S34.**  $^{13}\text{C}$ -NMR spectrum of compound **55** in  $\text{DMSO-}d_6$

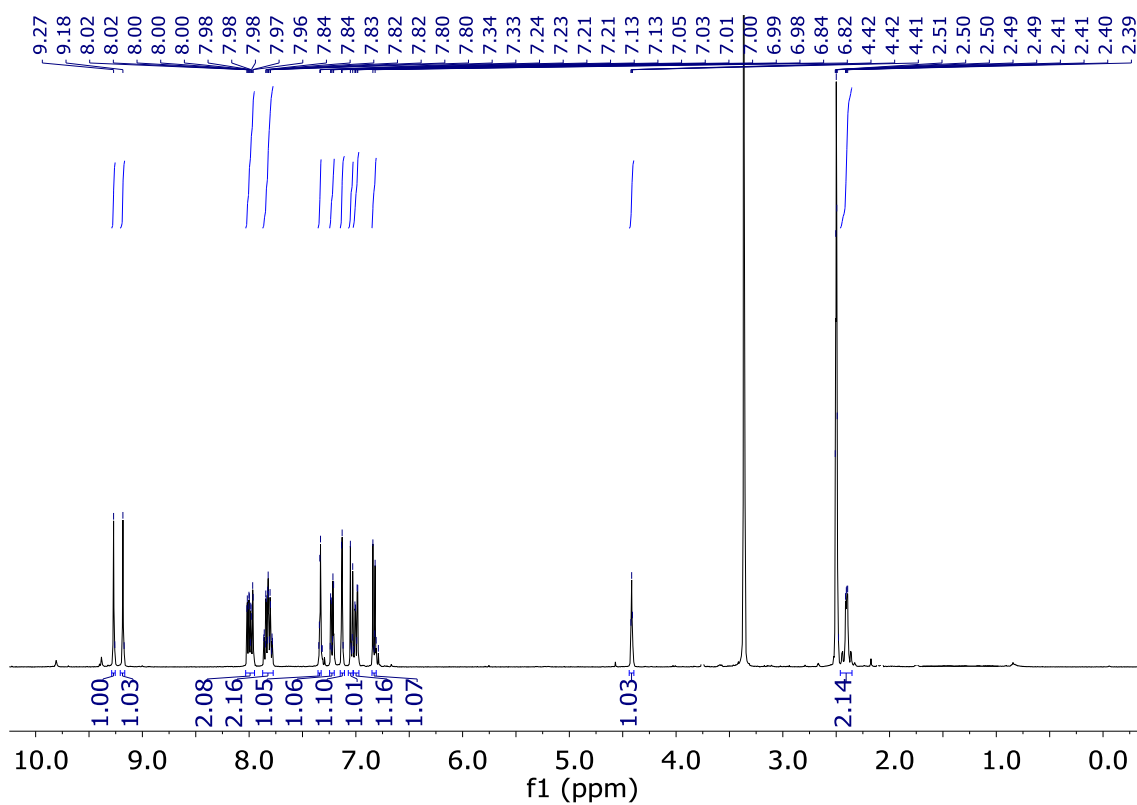

**Figure S35.**  $^1\text{H}$ -NMR spectrum of compound **56** in  $\text{DMSO}-d_6$

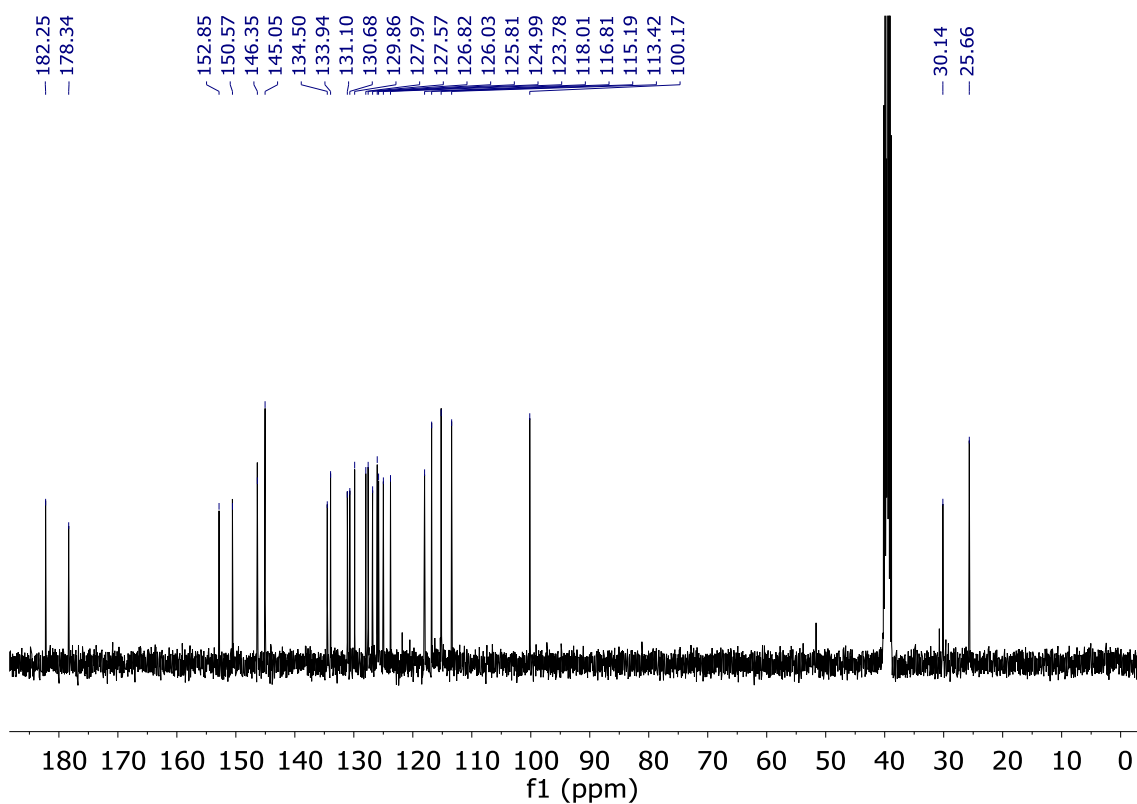

**Figure S36.**  $^{13}\text{C}$ -NMR spectrum of compound **56** in  $\text{DMSO}-d_6$

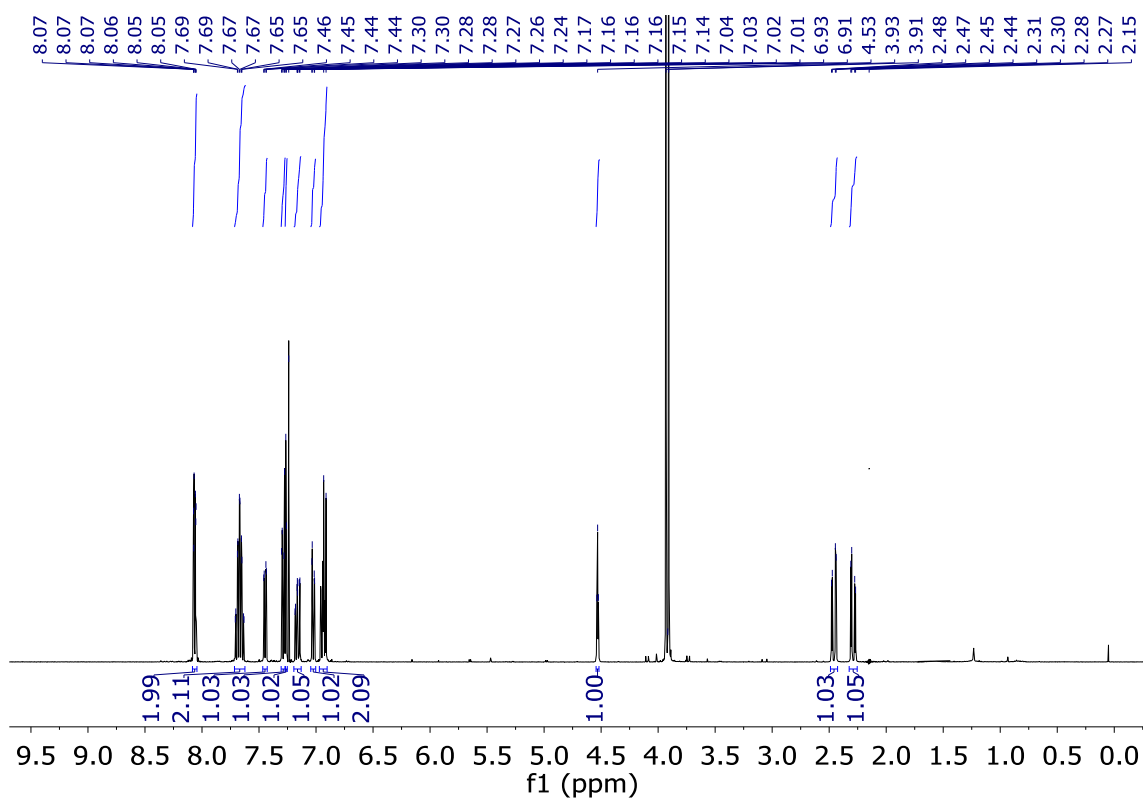

**Figure S37.** <sup>1</sup>H-NMR spectrum of compound **57** in CDCl<sub>3</sub>

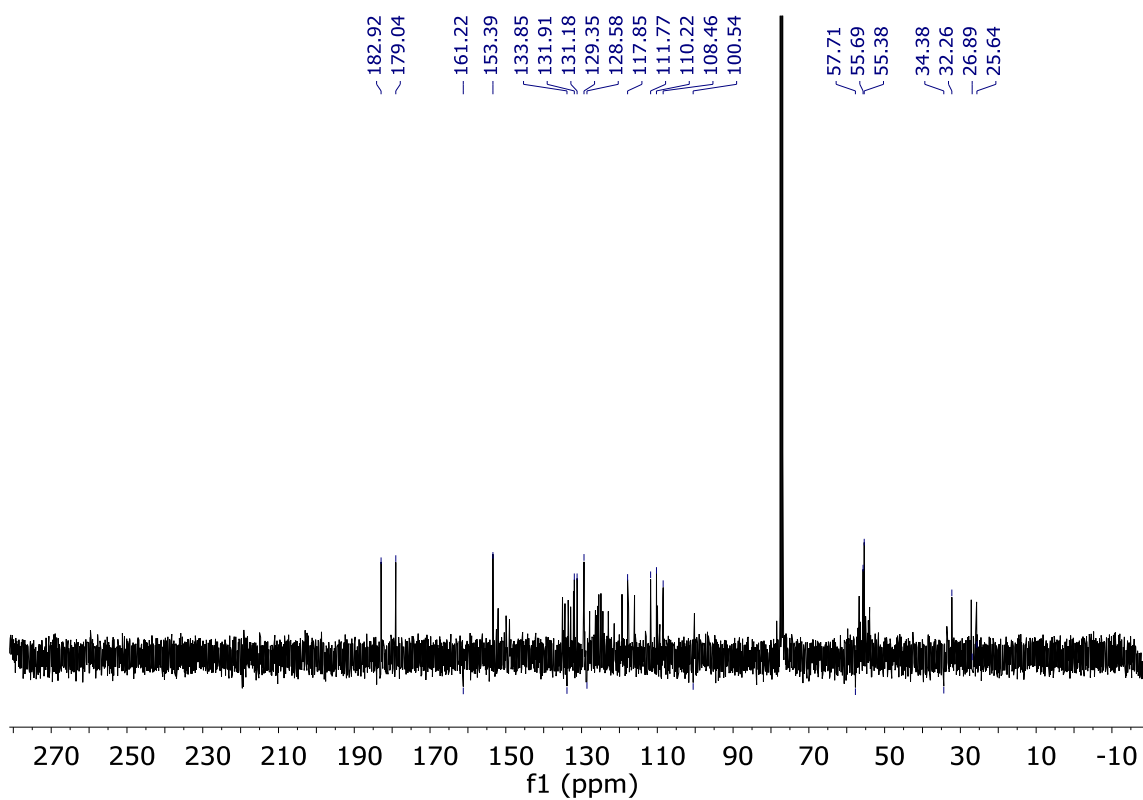

**Figure S38.** <sup>13</sup>C-NMR spectrum of compound **57** in CDCl<sub>3</sub>



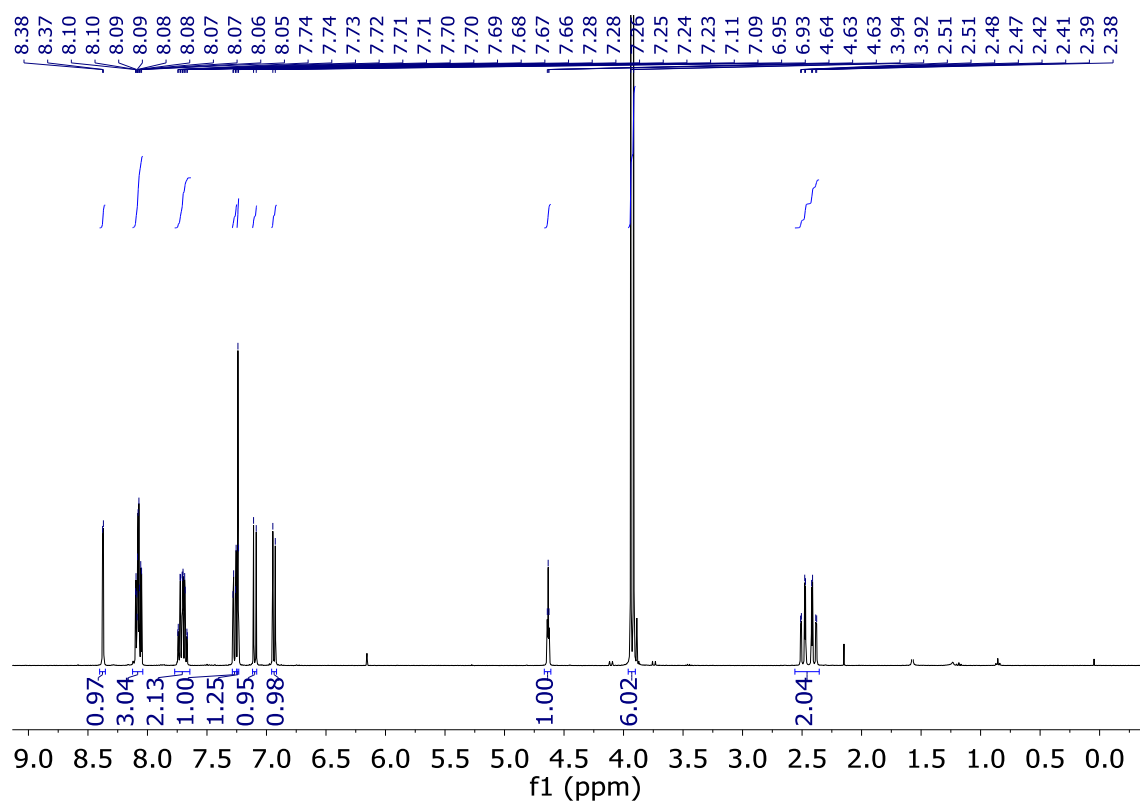

**Figure S39.** <sup>1</sup>H-NMR spectrum of compound **58** in CDCl<sub>3</sub>

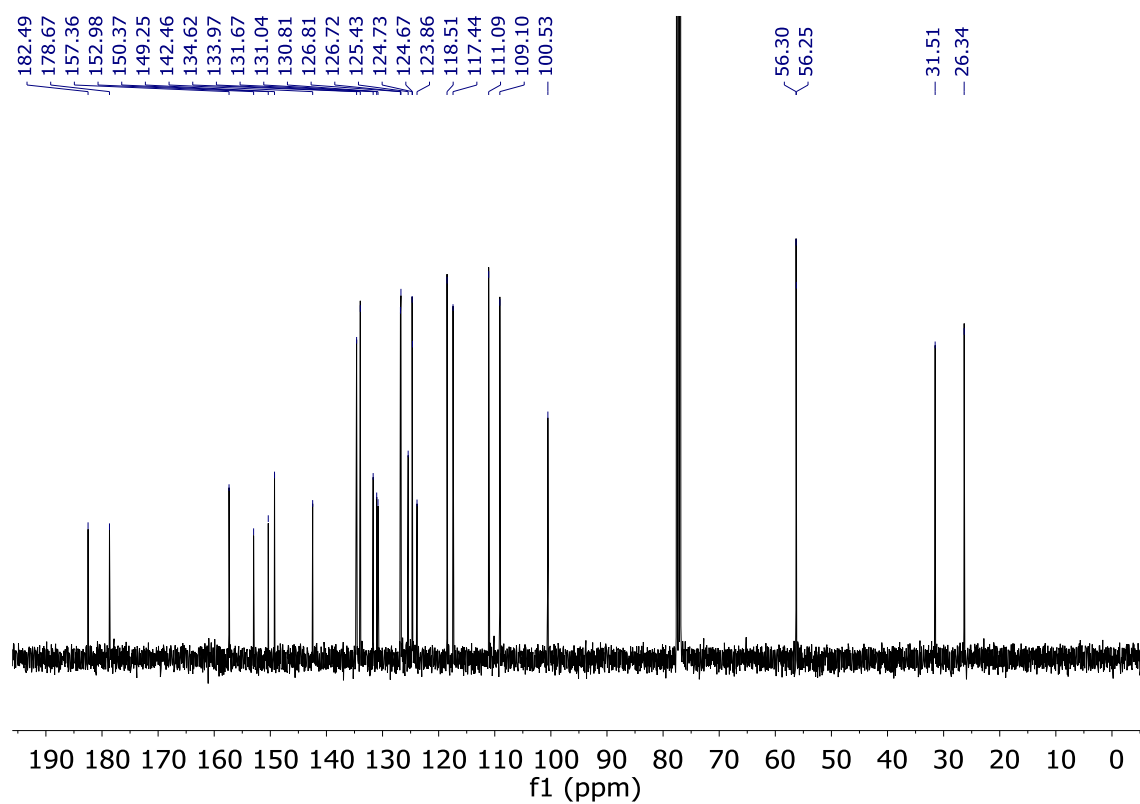

**Figure S40.** <sup>13</sup>C-NMR spectrum of compound **58** in CDCl<sub>3</sub>

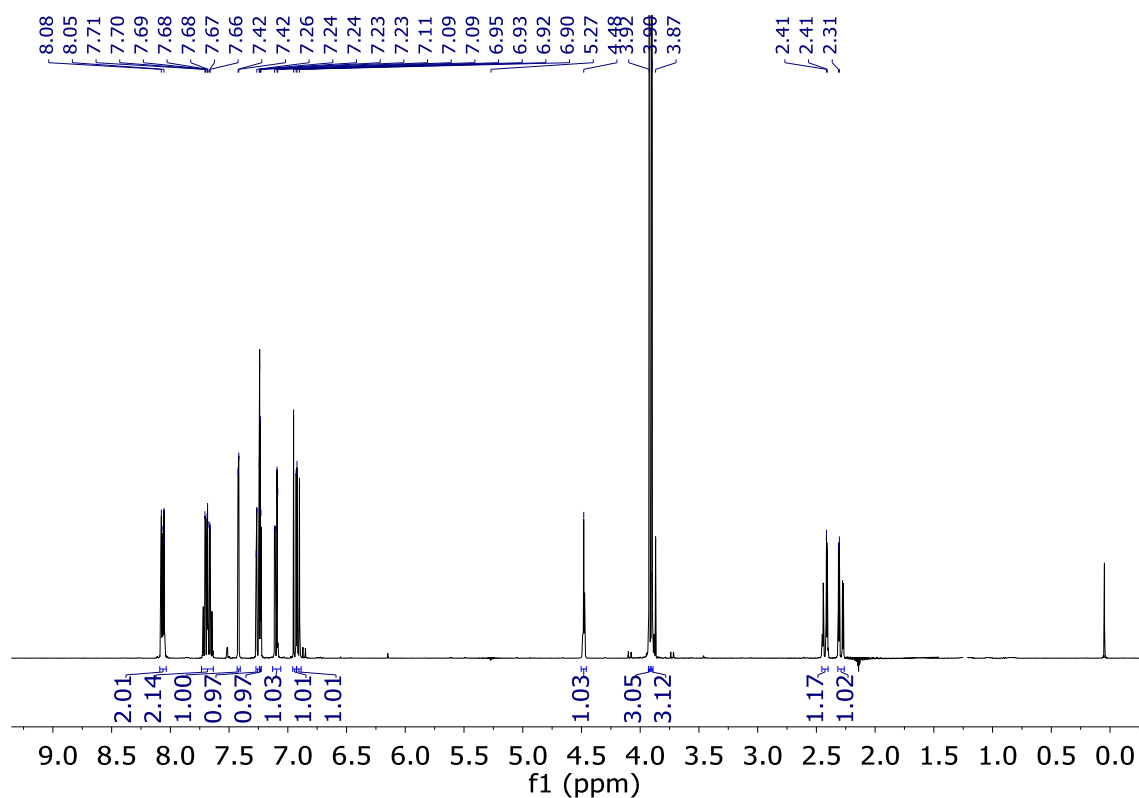

**Figure S41.** <sup>1</sup>H-NMR spectrum of compound **59** in CDCl<sub>3</sub>.

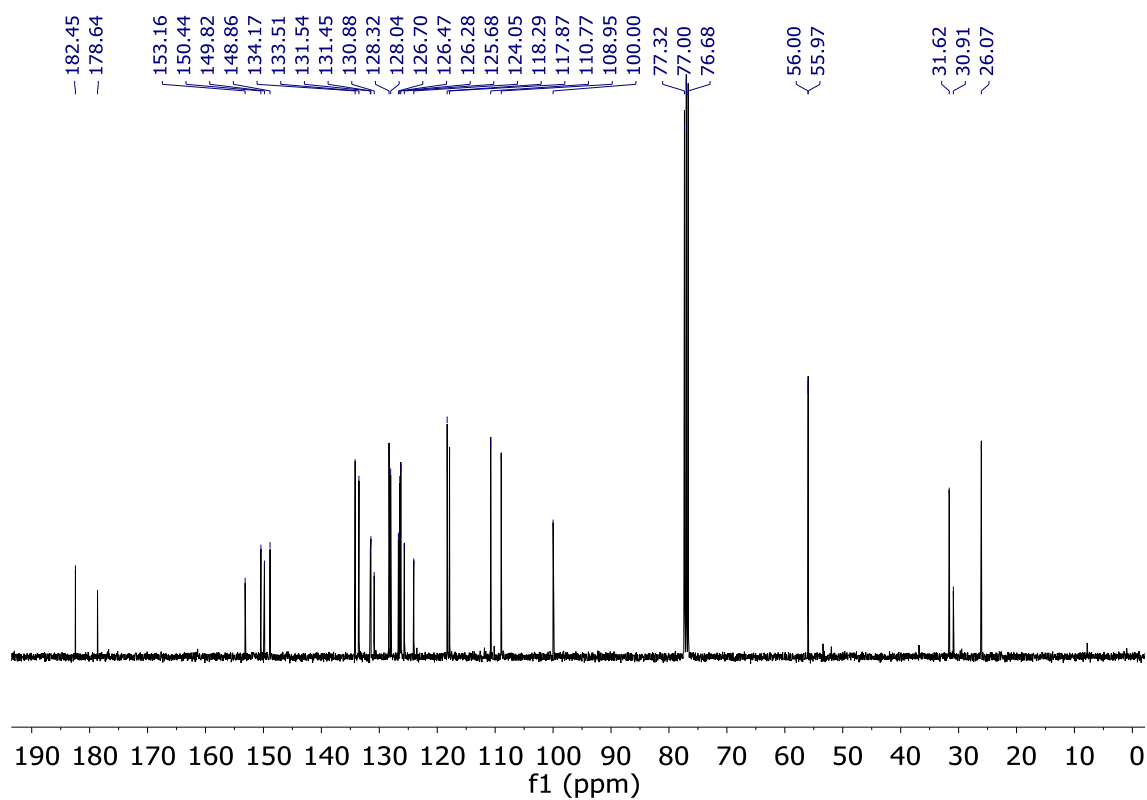

**Figure S42.** <sup>13</sup>C-NMR spectrum of compound **59** in CDCl<sub>3</sub>.

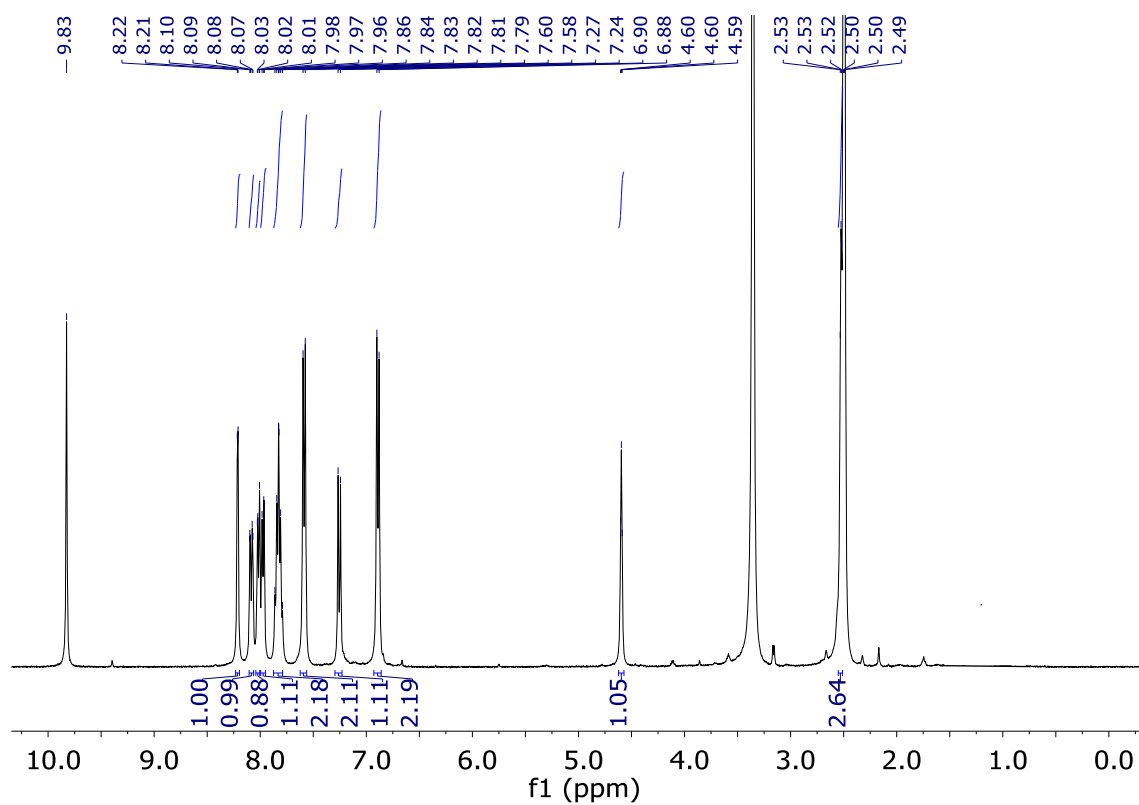

**Figure S43.** <sup>1</sup>H-NMR spectrum of compound **60** in DMSO-*d*<sub>6</sub>

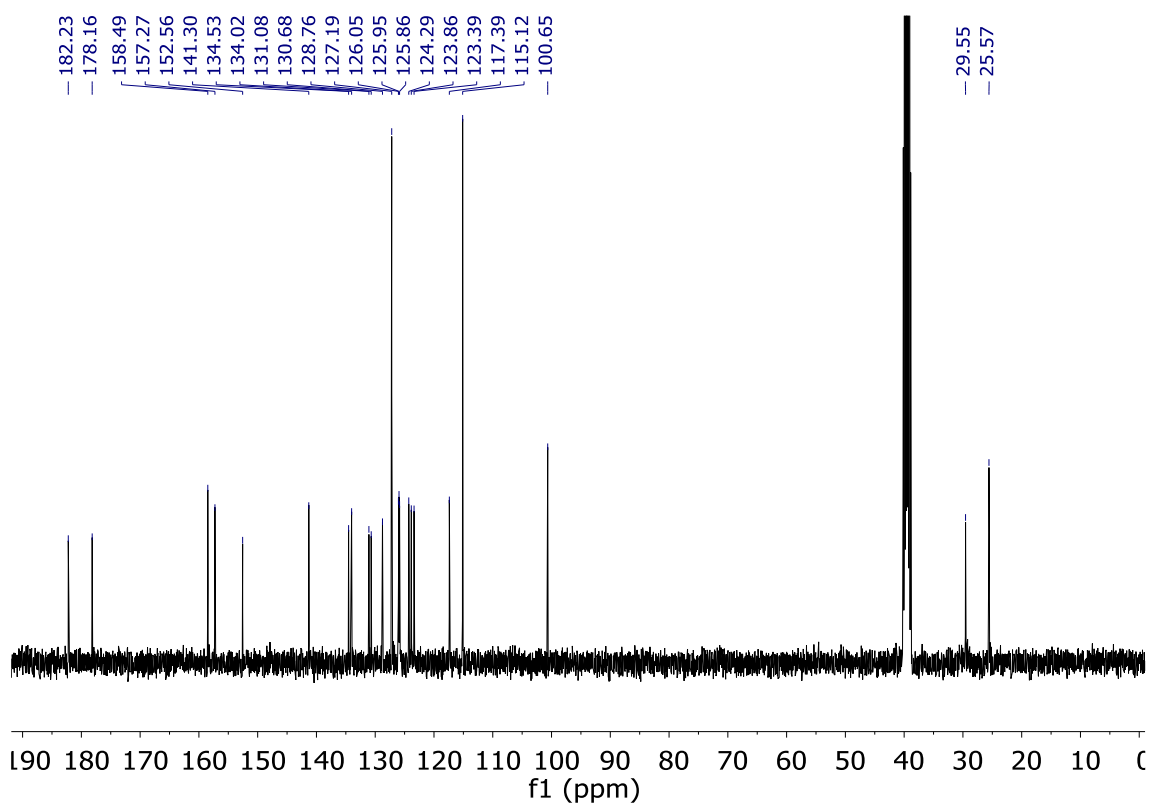

**Figure S44.** <sup>13</sup>C-NMR spectrum of compound **60** in DMSO-*d*<sub>6</sub>

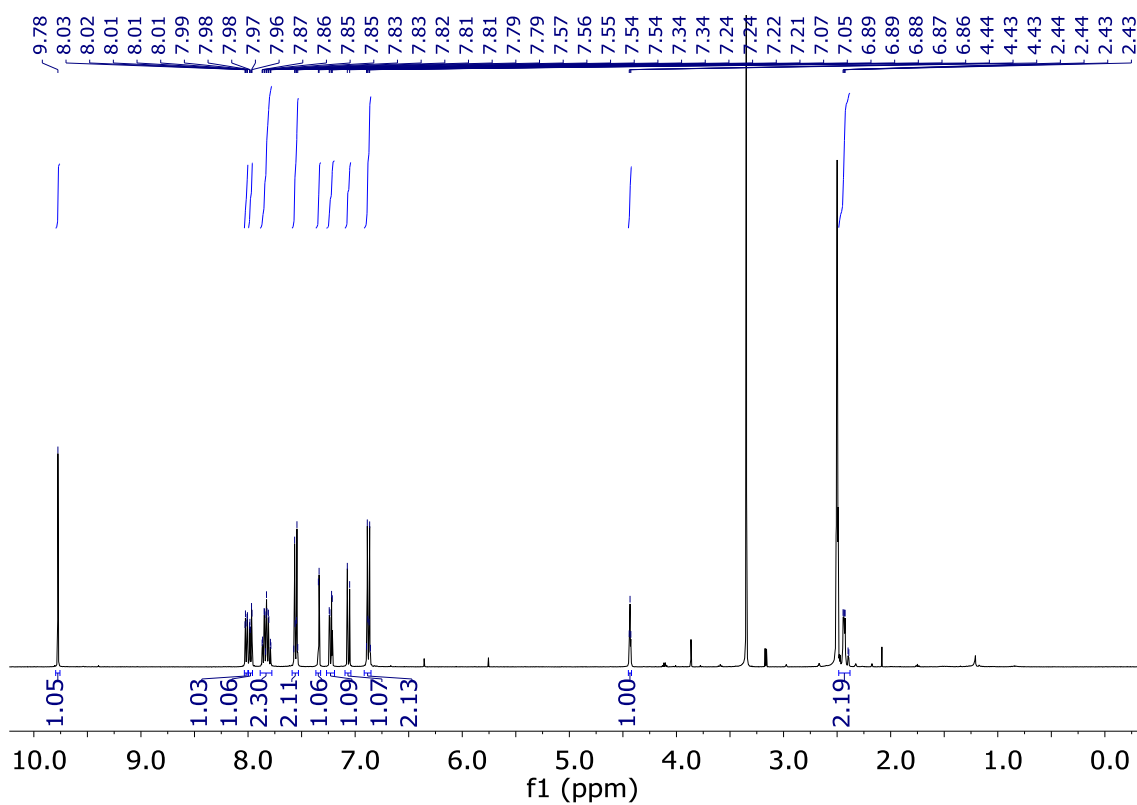

**Figure S45.**  $^1\text{H}$ -NMR spectrum of compound **61** in  $\text{DMSO}-d_6$

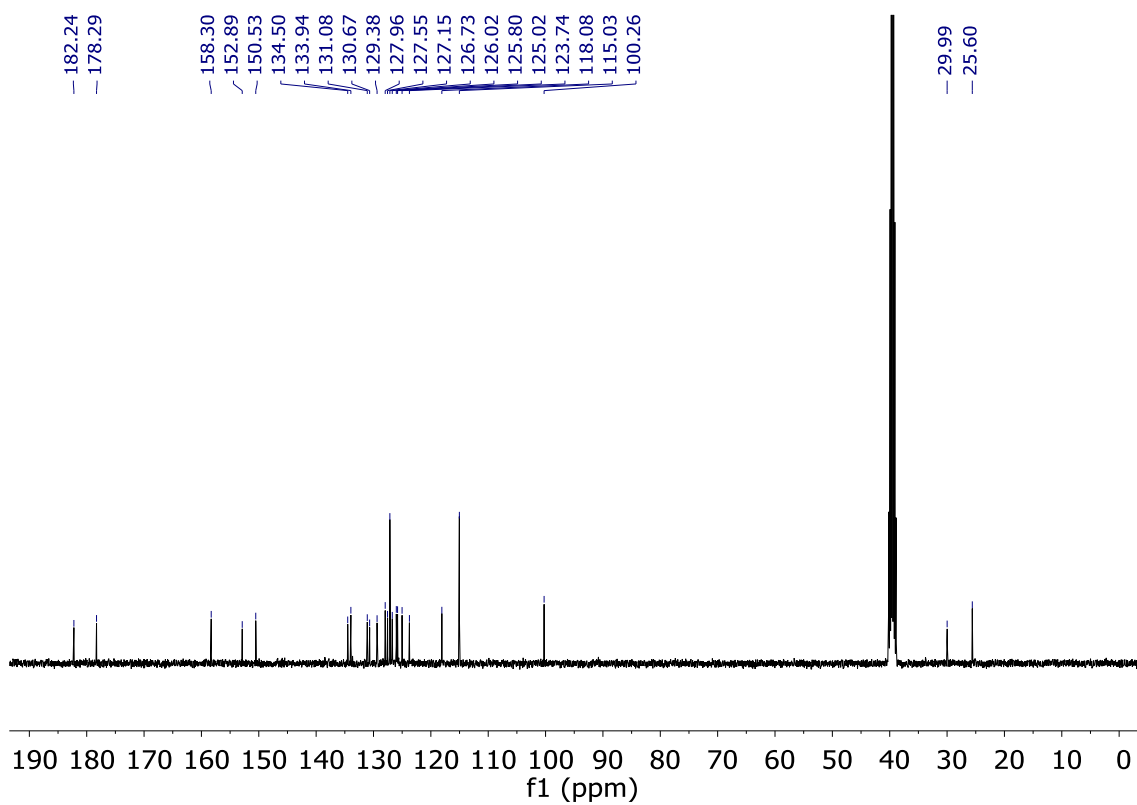

**Figure S46.**  $^{13}\text{C}$ -NMR spectrum of compound **61** in  $\text{DMSO}-d_6$

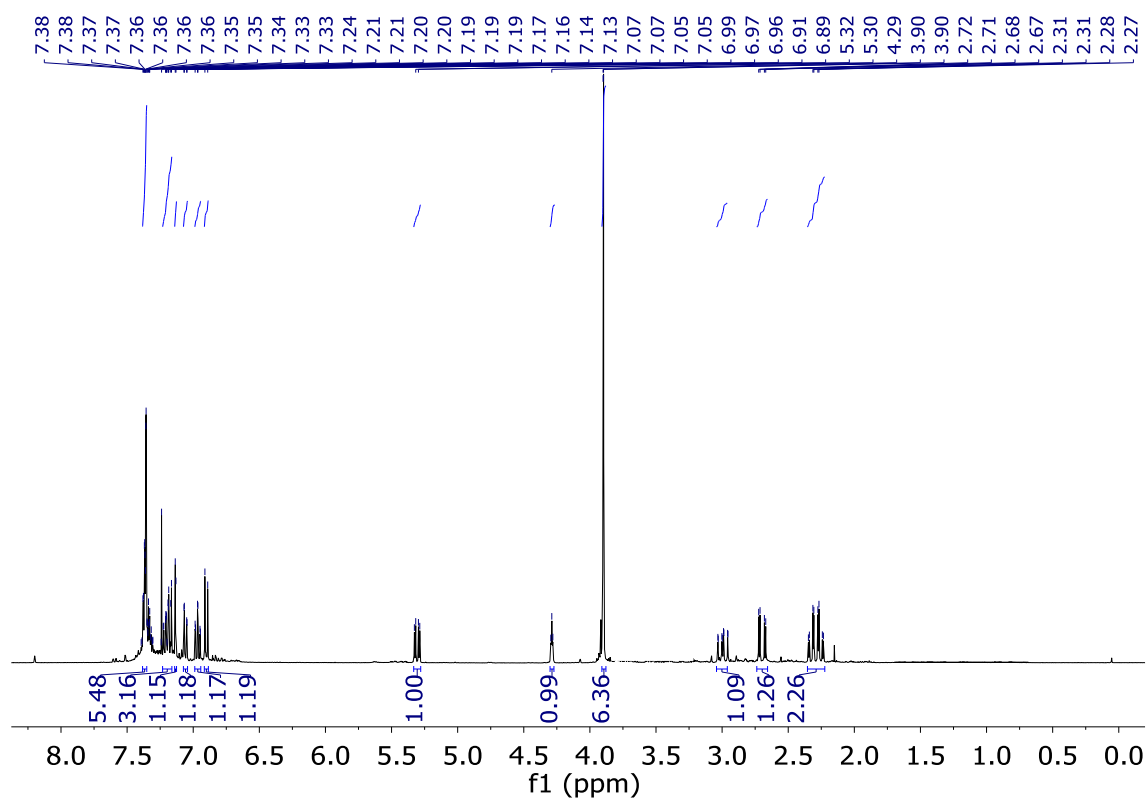

**Figure S47.**  $^1\text{H}$ -NMR spectrum of compound **62a** in  $\text{CDCl}_3$

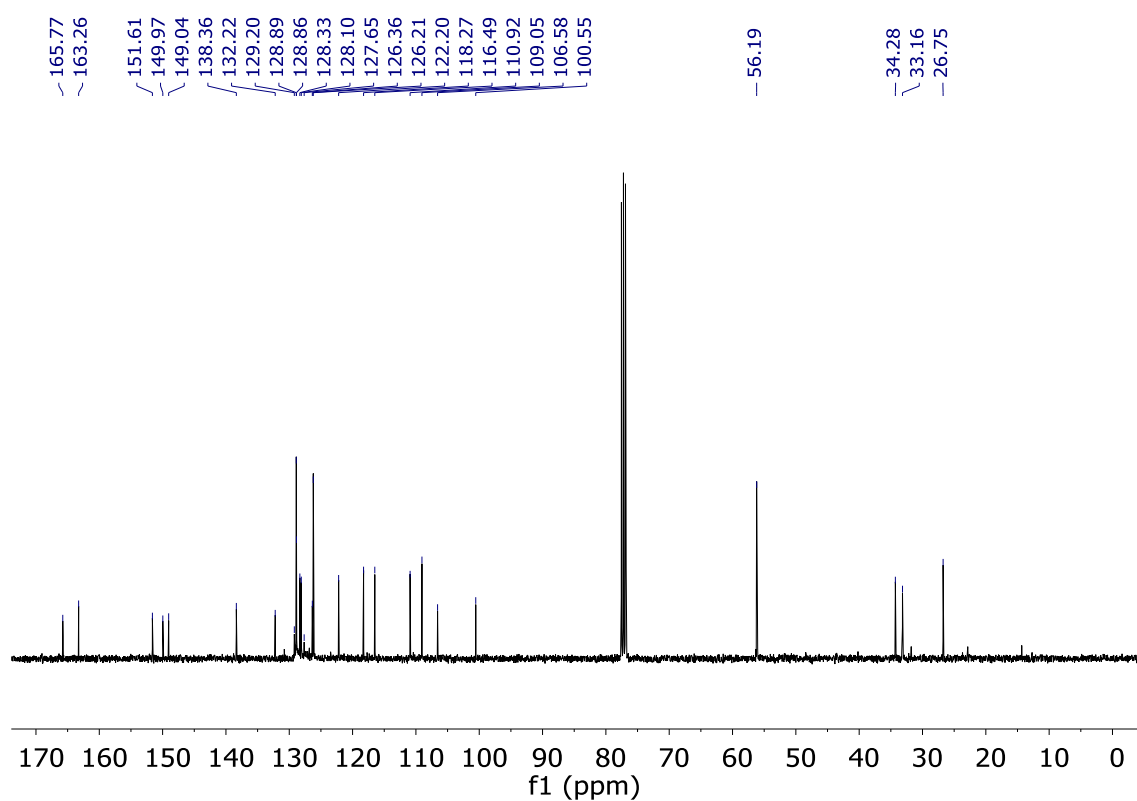

**Figure S48.**  $^{13}\text{C}$ -NMR spectrum of compound **62a** in  $\text{CDCl}_3$



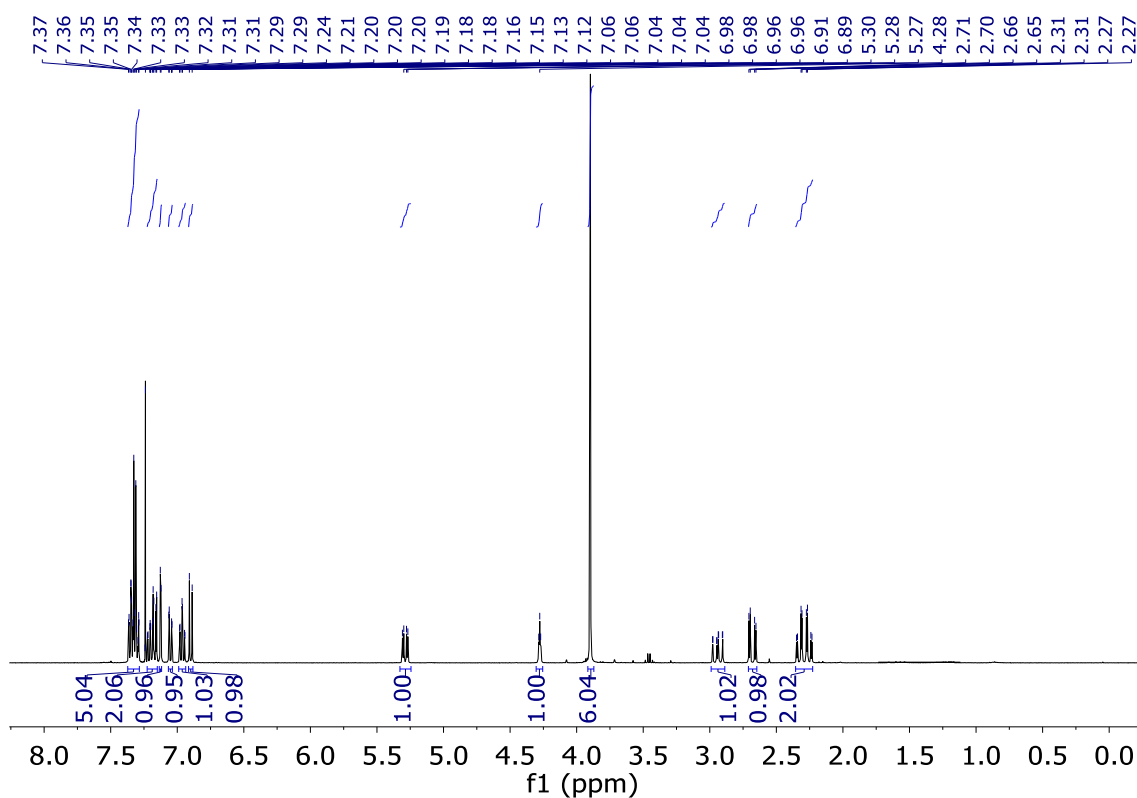

**Figure S51.**  $^1\text{H}$ -NMR spectrum of compound **63a** in  $\text{CDCl}_3$

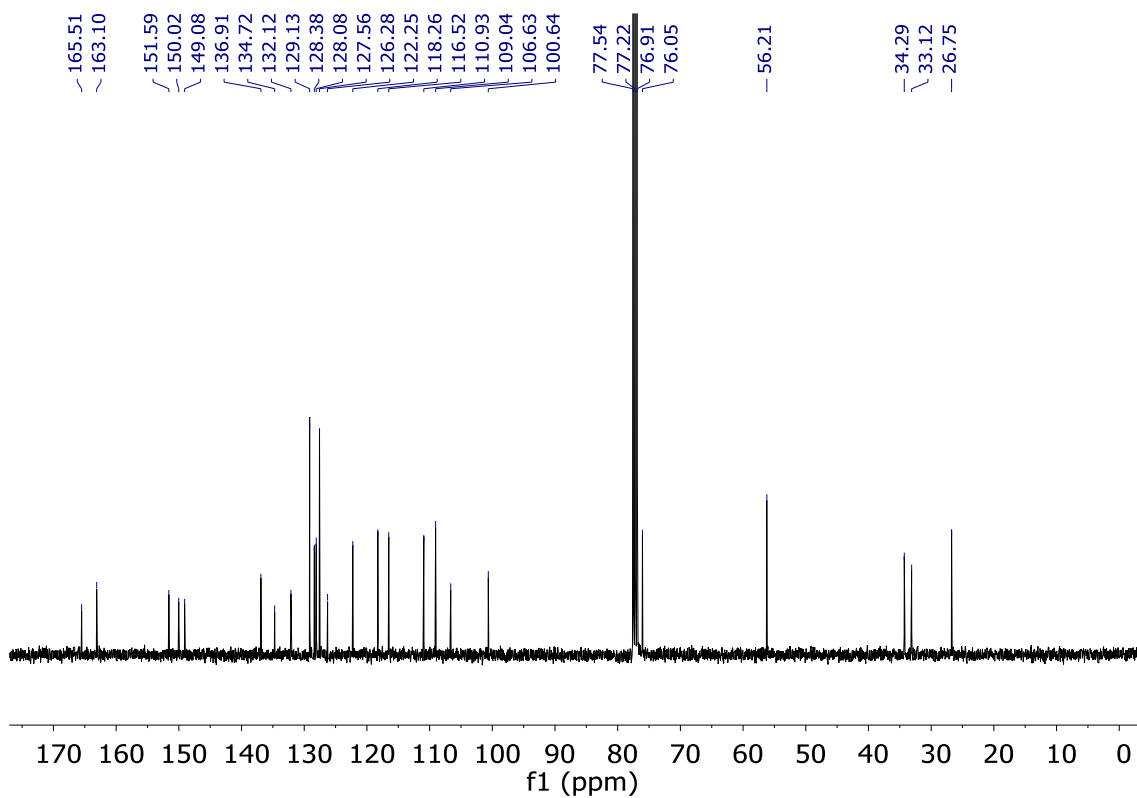

**Figure S52.**  $^{13}\text{C}$ -NMR spectrum of compound **63a** in  $\text{CDCl}_3$

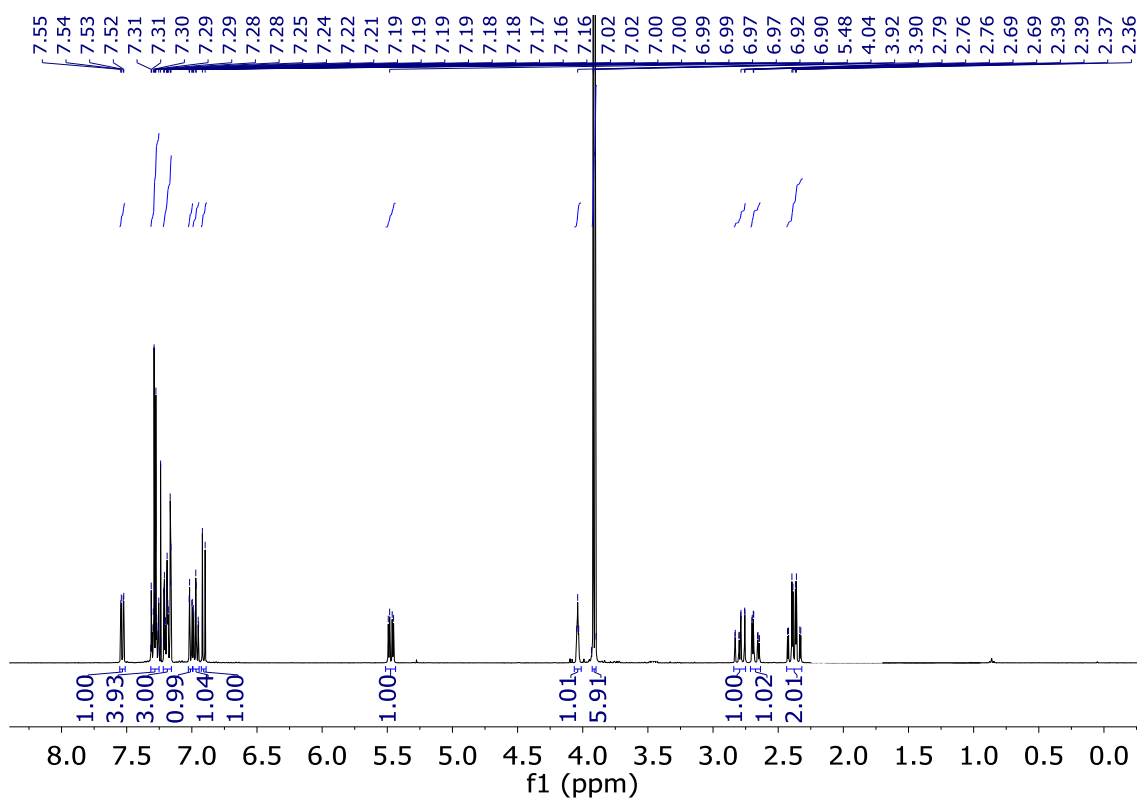

**Figure S53.**  $^1\text{H}$ -NMR spectrum of compound **63b** in  $\text{CDCl}_3$

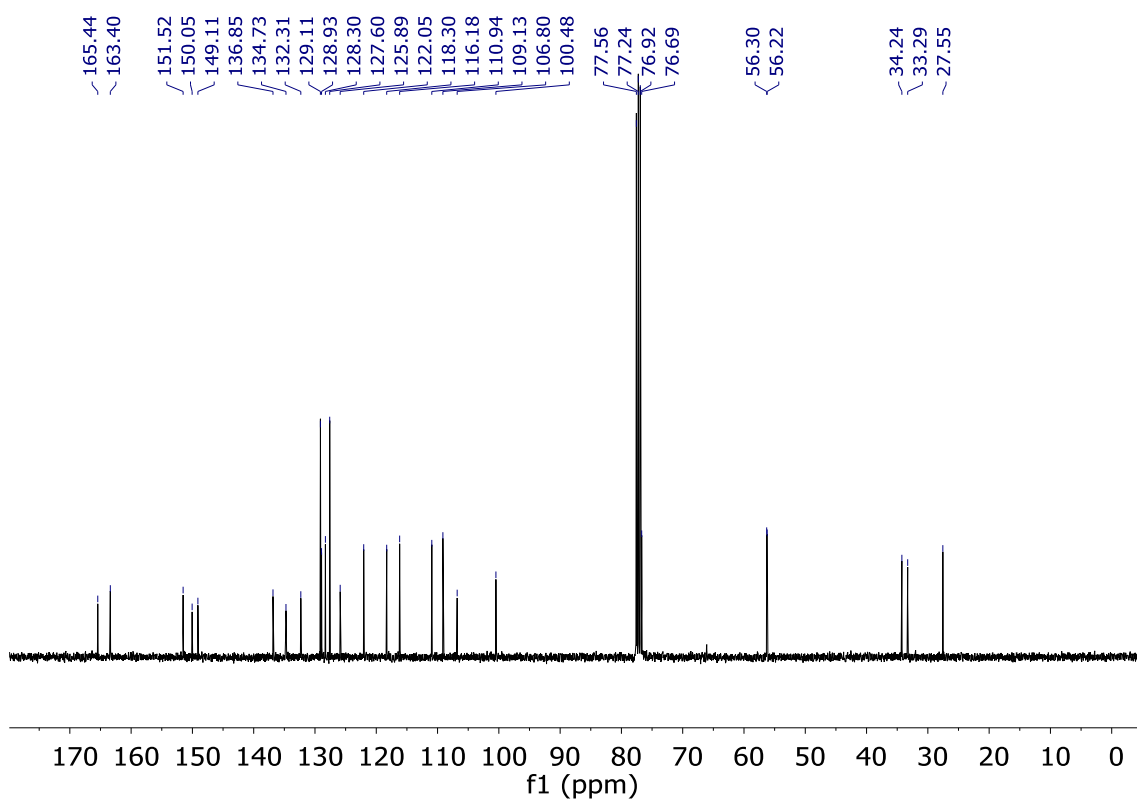

**Figure S54.**  $^{13}\text{C}$ -NMR spectrum of compound **63b** in  $\text{CDCl}_3$



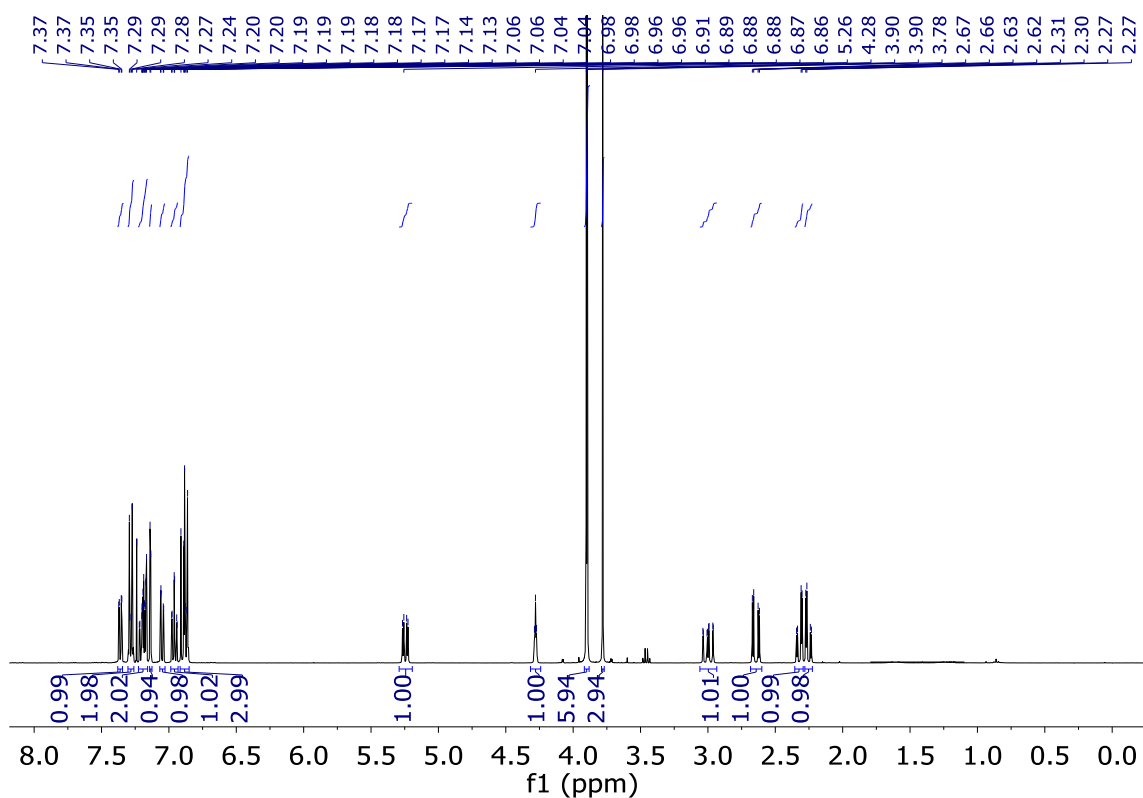

**Figure S55.** <sup>1</sup>H-NMR spectrum of compound **64a** in CDCl<sub>3</sub>

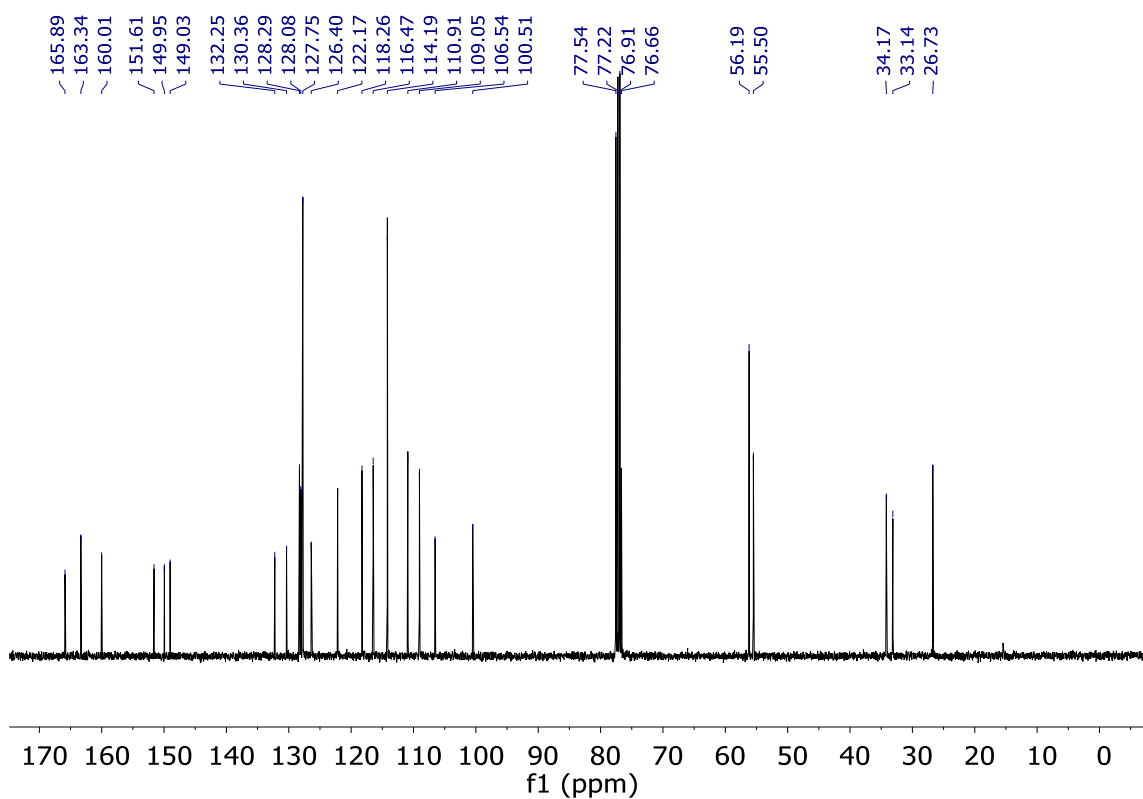

**Figure S56.** <sup>13</sup>C-NMR spectrum of compound **64a** in CDCl<sub>3</sub>

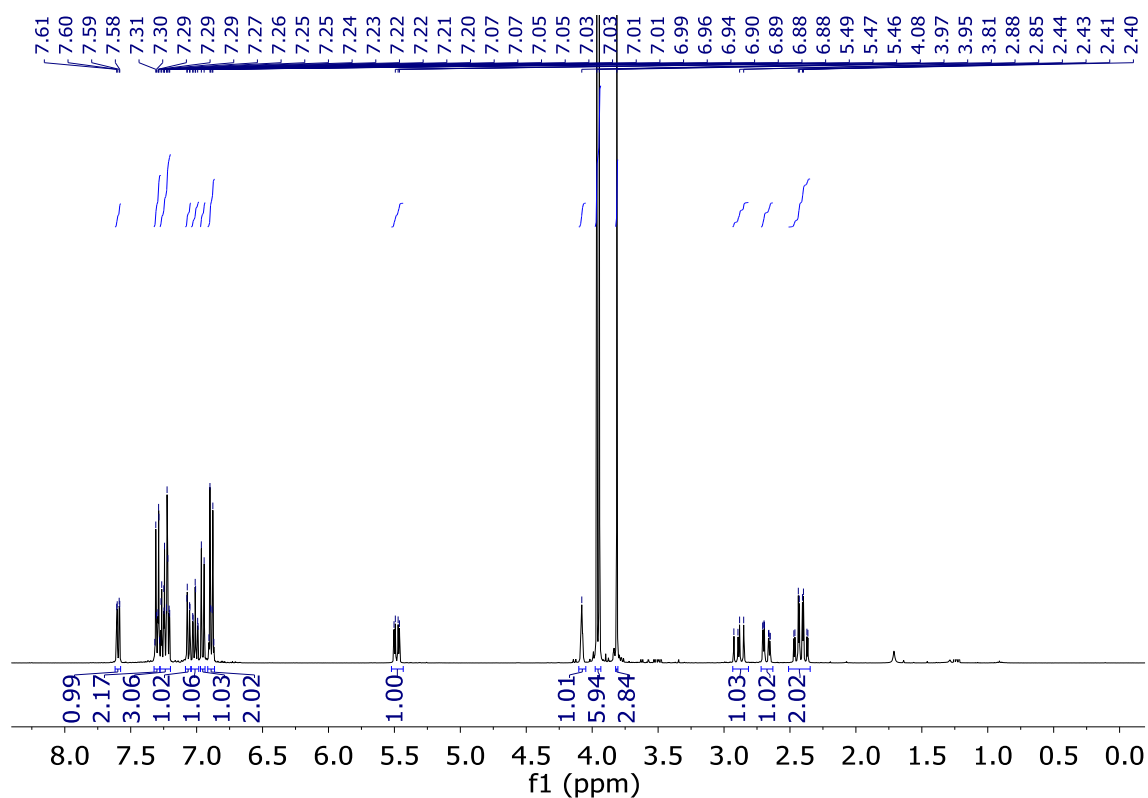

**Figure S57.** <sup>1</sup>H-NMR spectrum of compound **64b** in CDCl<sub>3</sub>

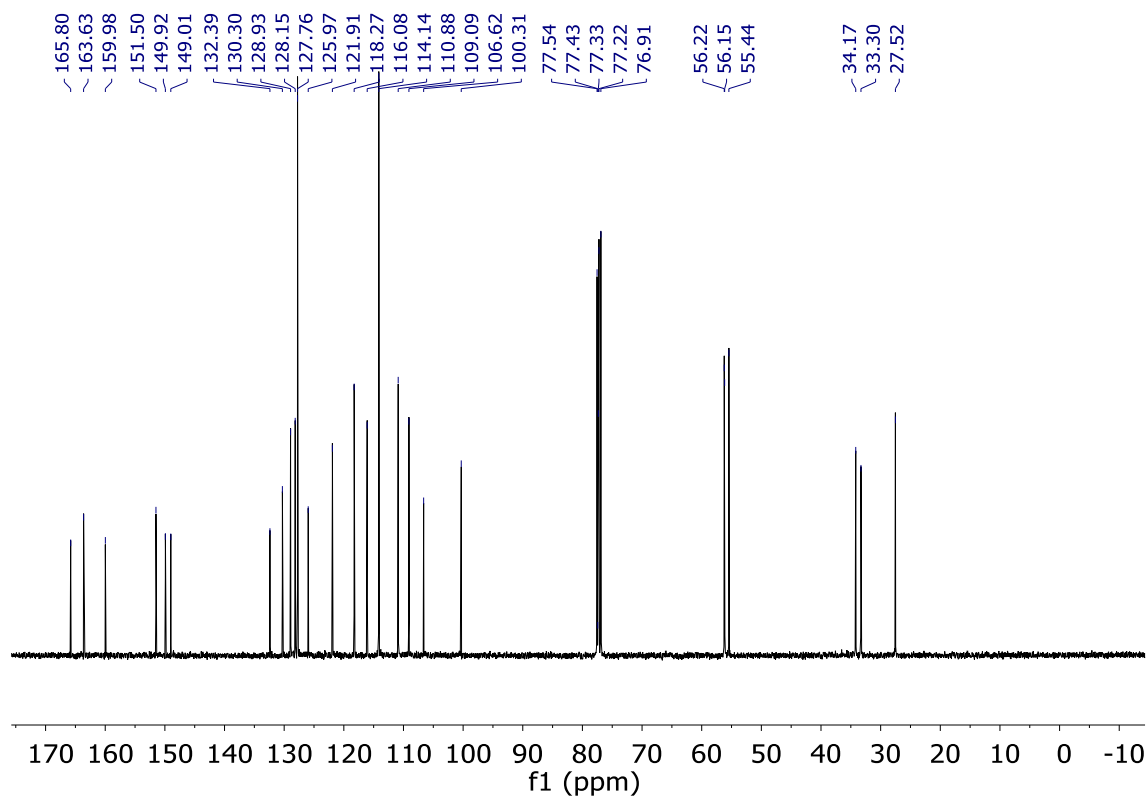

**Figure S58.** <sup>13</sup>C-NMR spectrum of compound **64b** in CDCl<sub>3</sub>

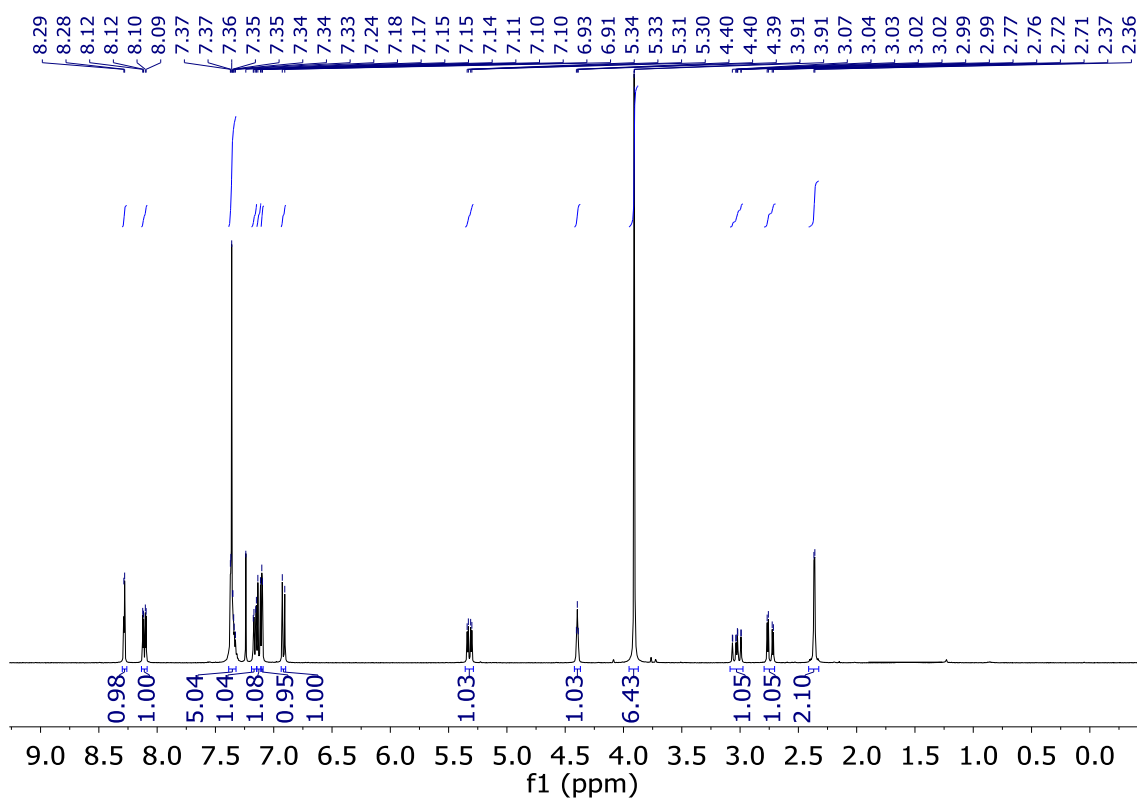

**Figure S59.** <sup>1</sup>H-NMR spectrum of compound **65a** in CDCl<sub>3</sub>

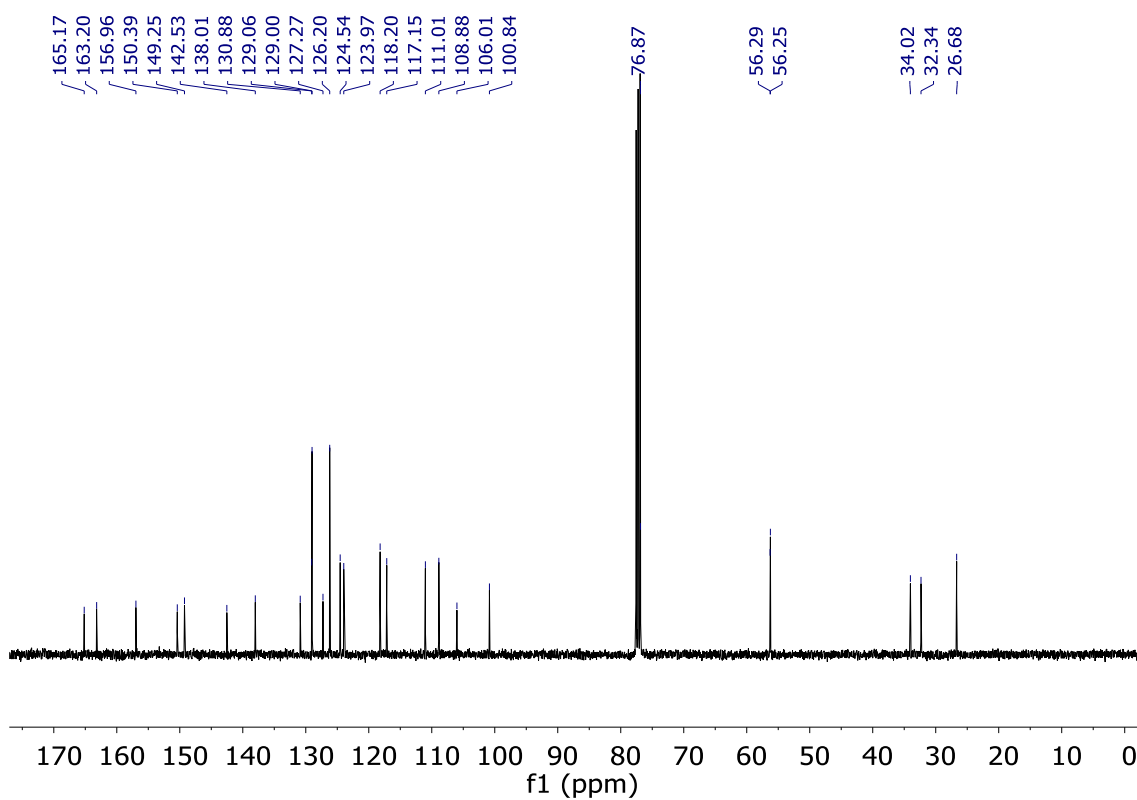

**Figure S60.** <sup>13</sup>C-NMR spectrum of compound **65a** in CDCl<sub>3</sub>

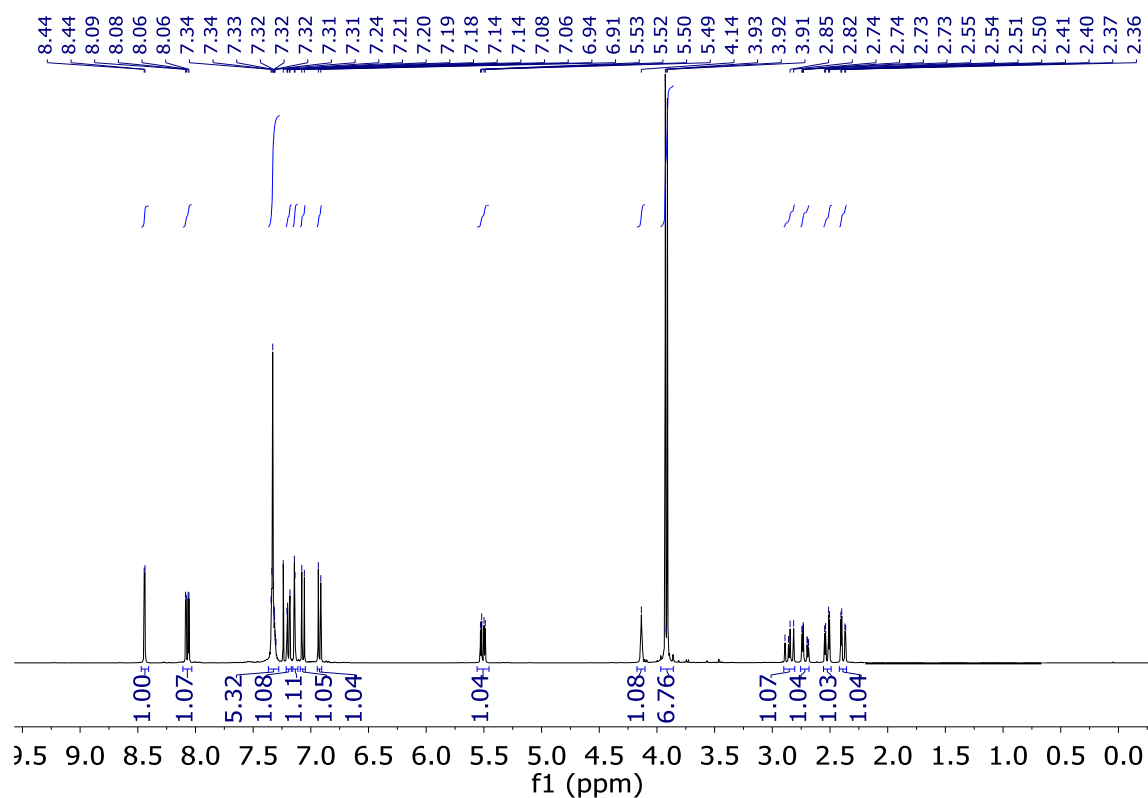

**Figure S61.**  $^1\text{H}$ -NMR spectrum of compound **65b** in  $\text{CDCl}_3$

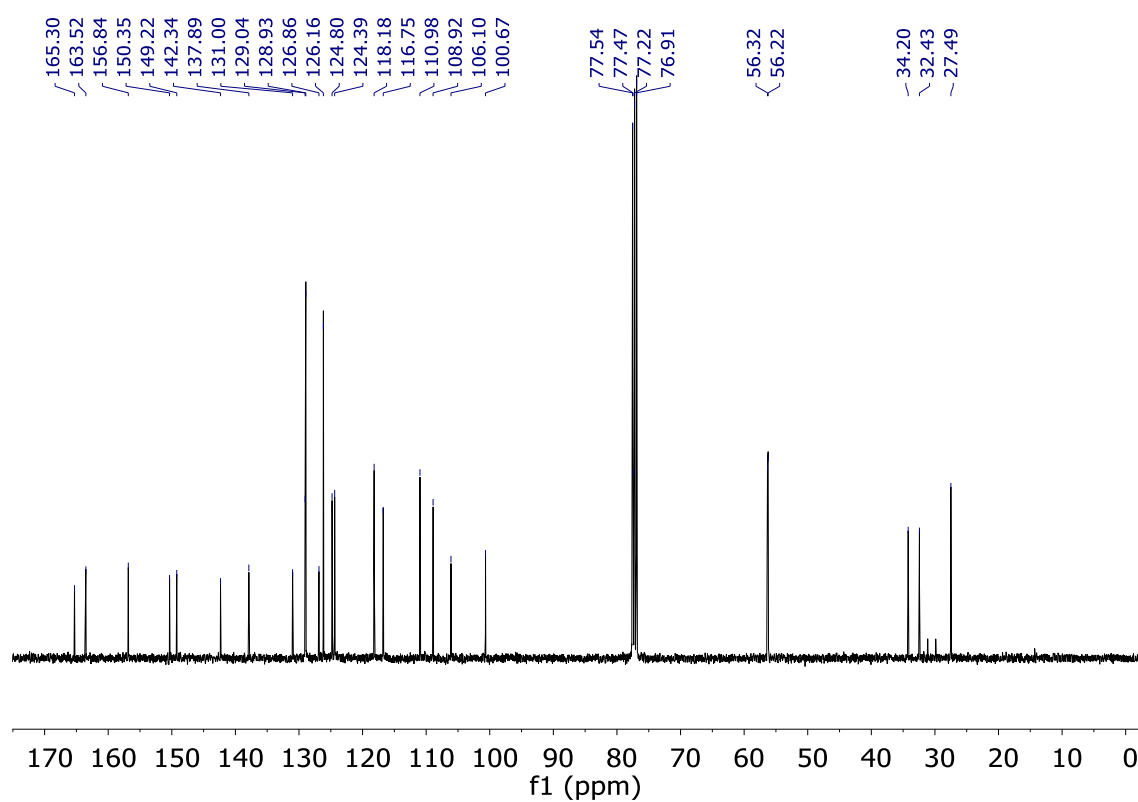

**Figure S62.**  $^{13}\text{C}$ -NMR spectrum of compound **65b** in  $\text{CDCl}_3$

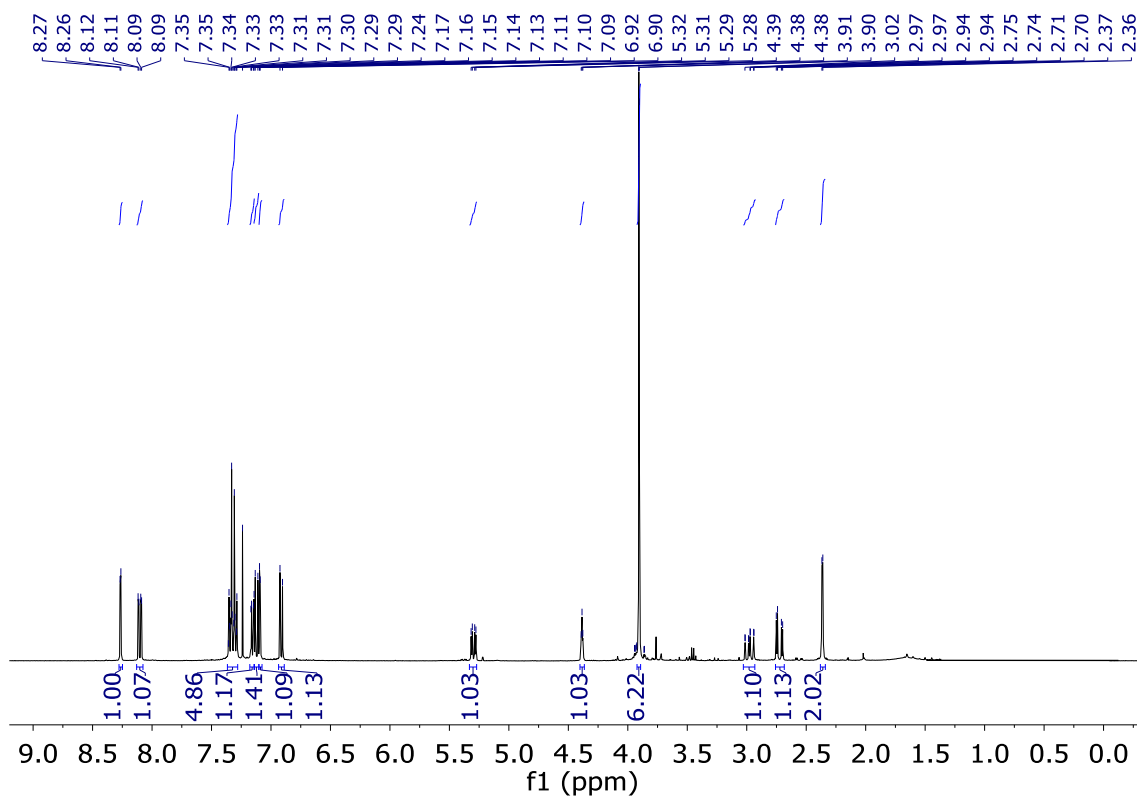

**Figure S63.** <sup>1</sup>H-NMR spectrum of compound **66a** in CDCl<sub>3</sub>

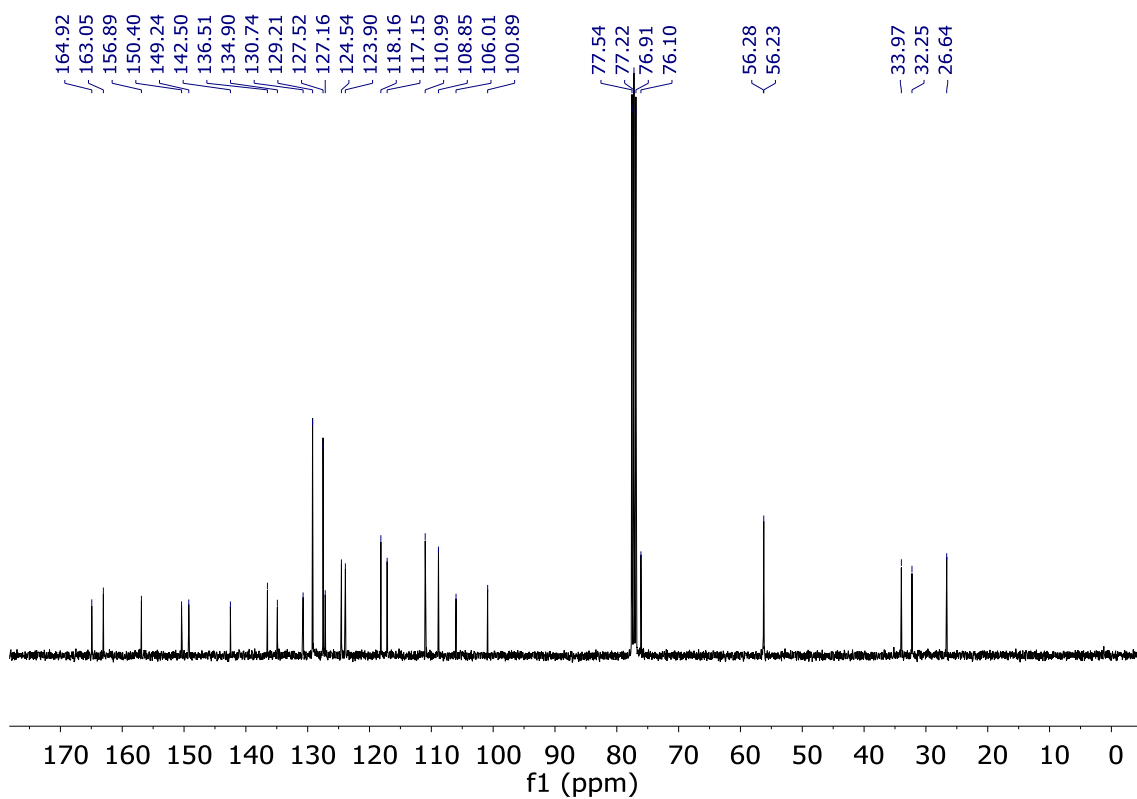

**Figure S64.** <sup>13</sup>C-NMR spectrum of compound **66a** in CDCl<sub>3</sub>

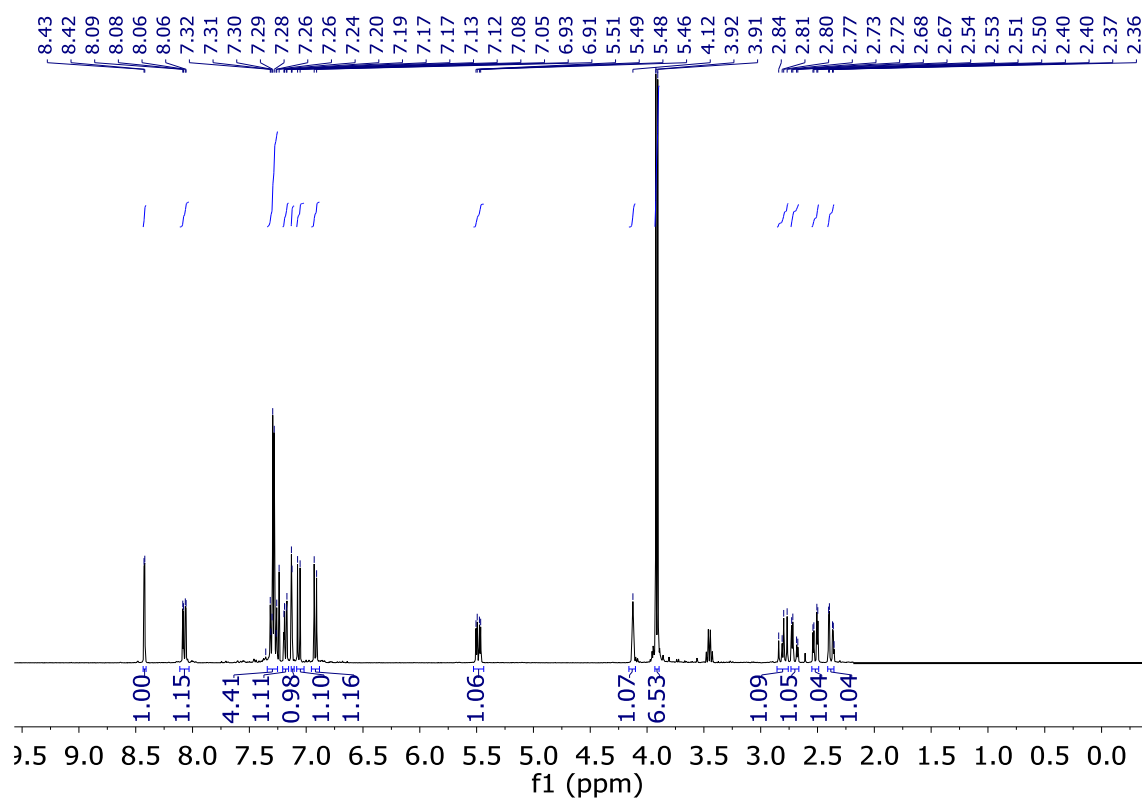

**Figure S65.** <sup>1</sup>H-NMR spectrum of compound **66b** in CDCl<sub>3</sub>

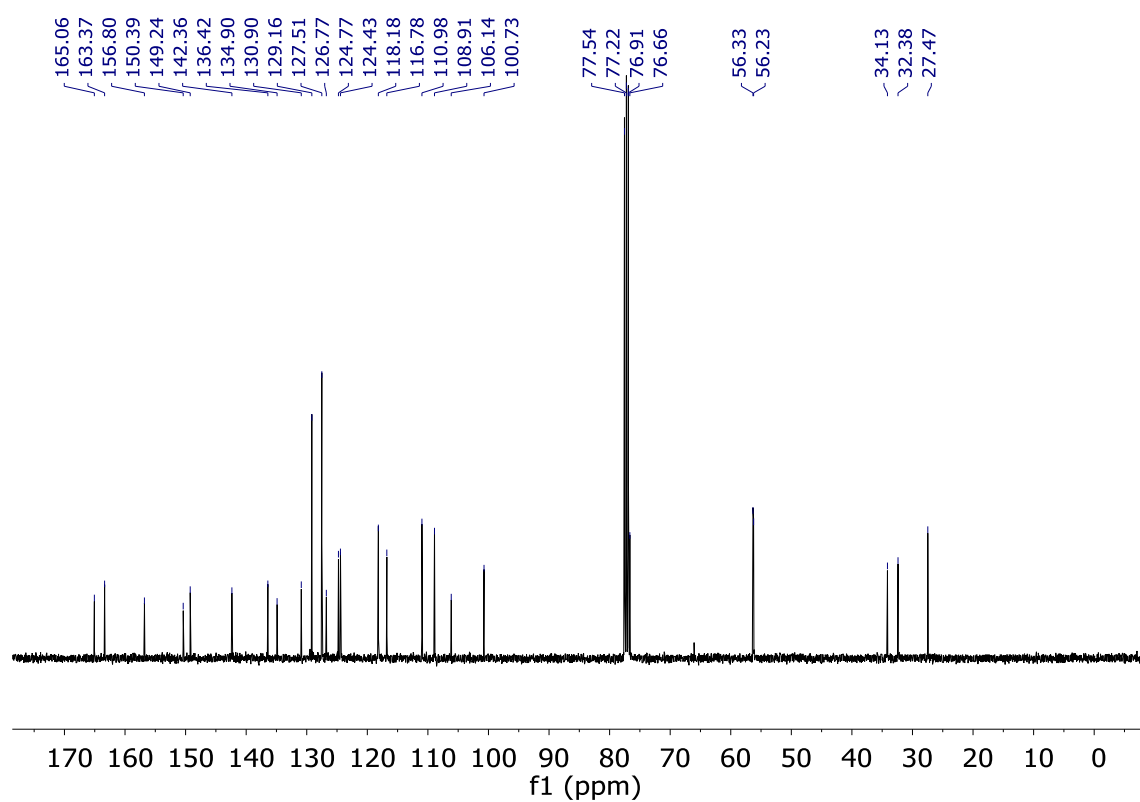

**Figure S66.** <sup>13</sup>C-NMR spectrum of compound **66b** in CDCl<sub>3</sub>

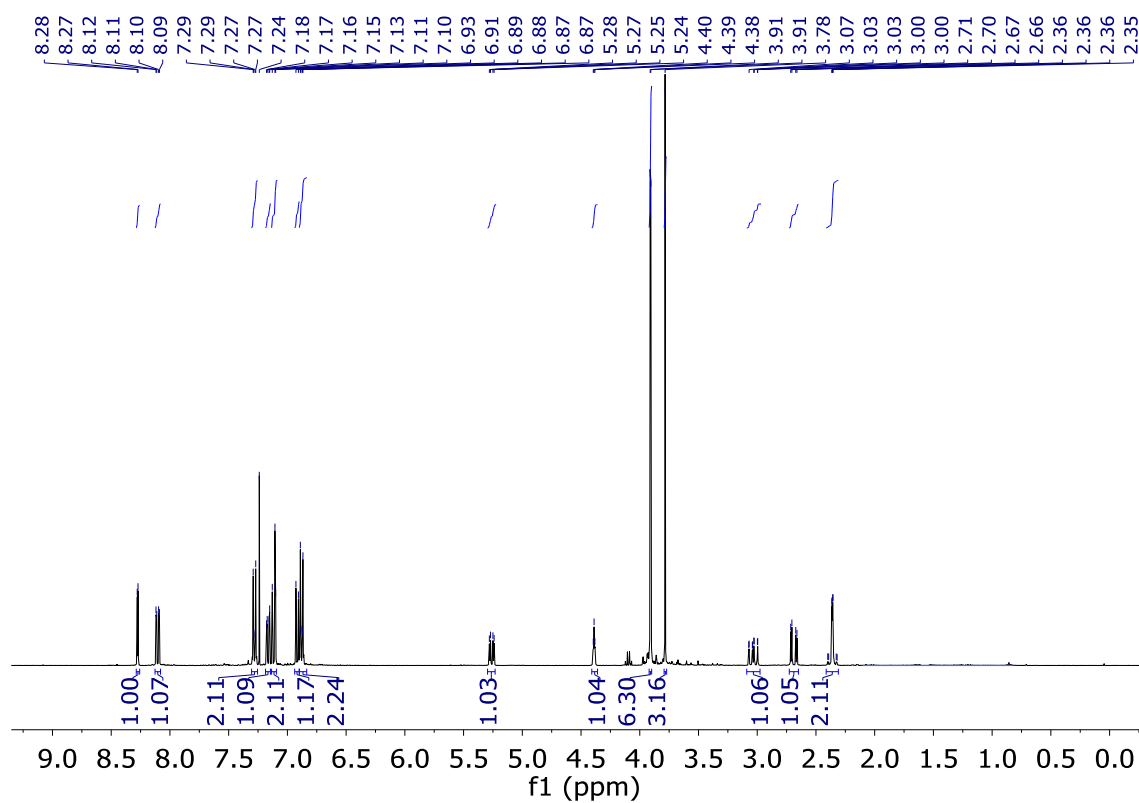

**Figure S67.**  $^1\text{H}$ -NMR spectrum of compound **67a** in  $\text{CDCl}_3$

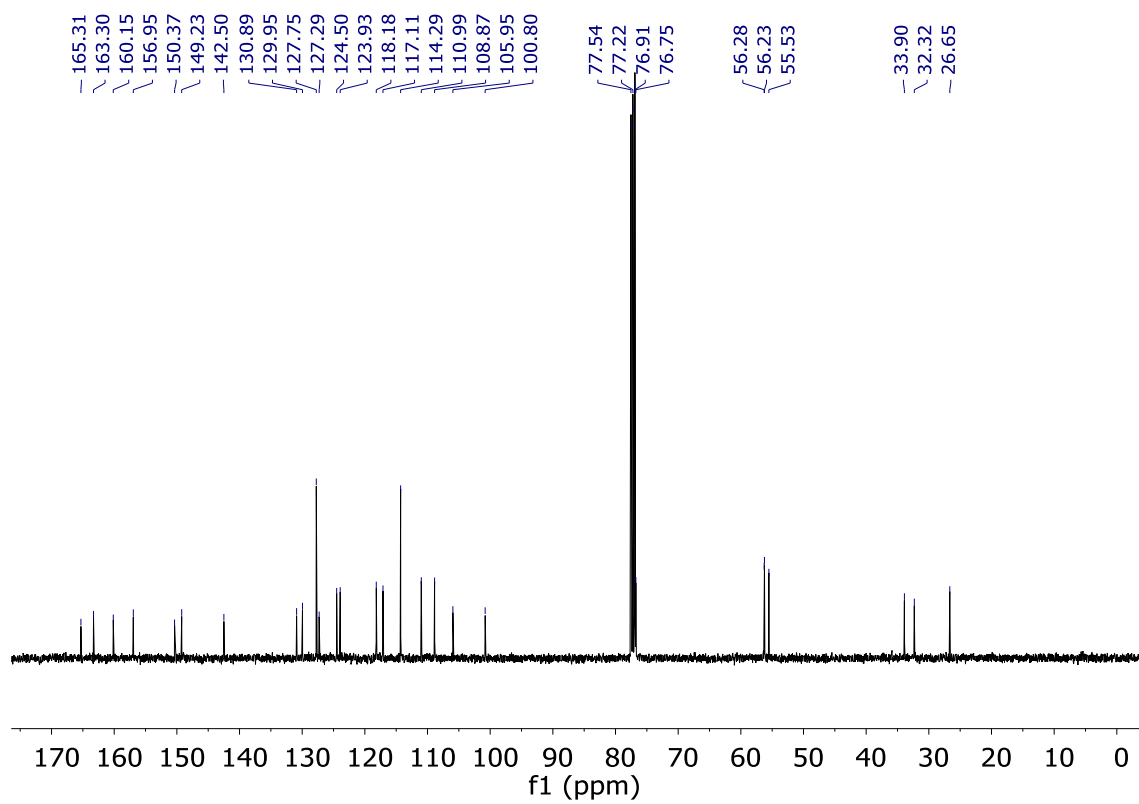

**Figure S68.**  $^{13}\text{C}$ -NMR spectrum of compound **67a** in  $\text{CDCl}_3$

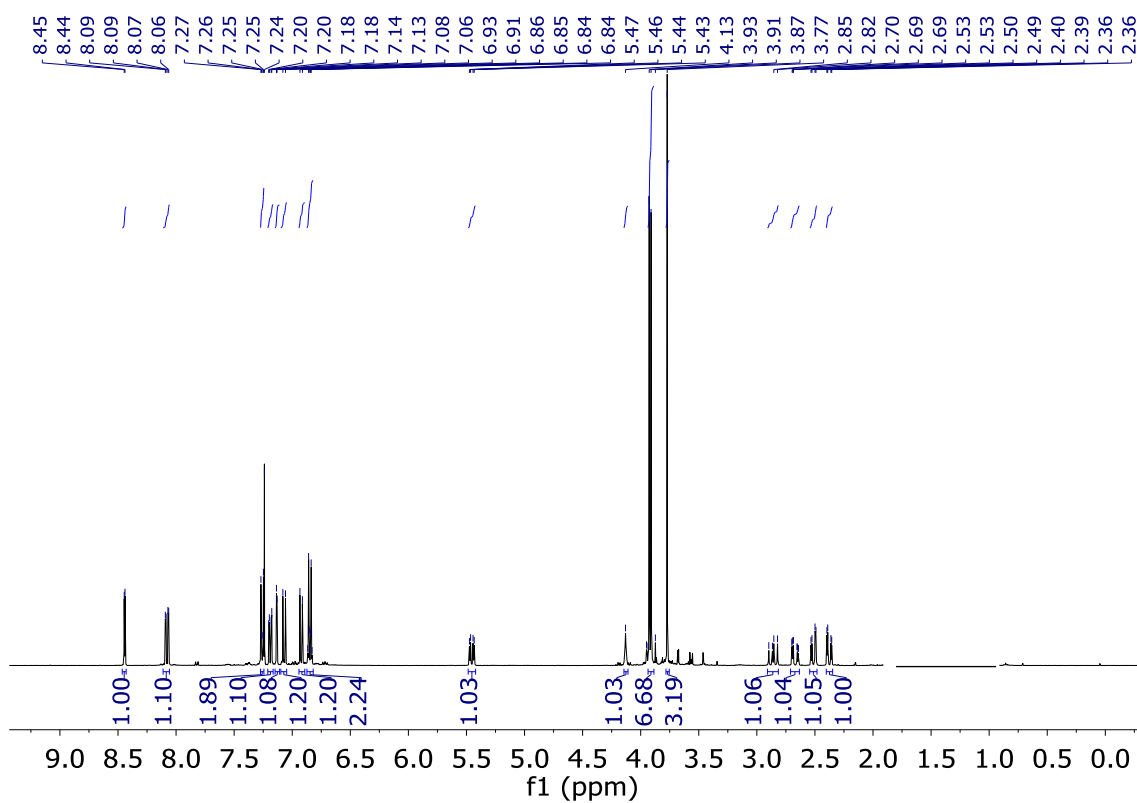

**Figure S69.** <sup>1</sup>H-NMR spectrum of compound **67b** in CDCl<sub>3</sub>

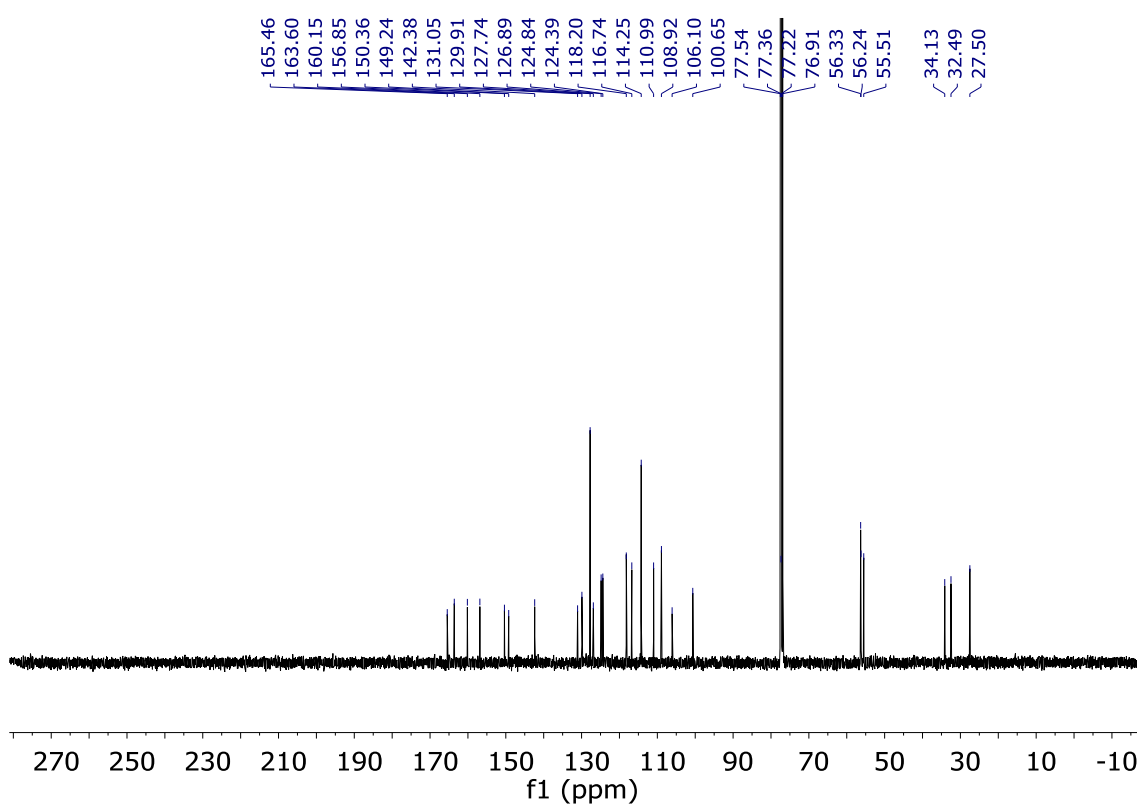

**Figure S70.** <sup>13</sup>C-NMR spectrum of compound **67b** in CDCl<sub>3</sub>



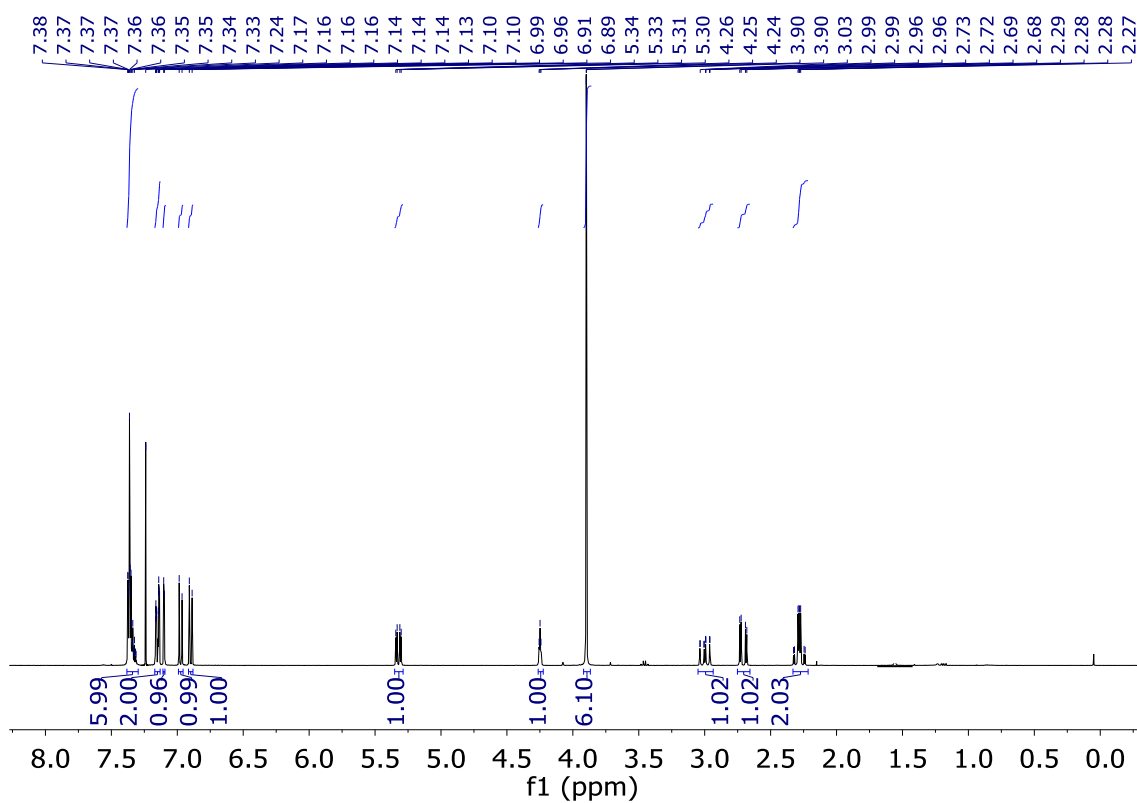

**Figure S71.**  $^1\text{H}$ -NMR spectrum of compound **68a** in  $\text{CDCl}_3$

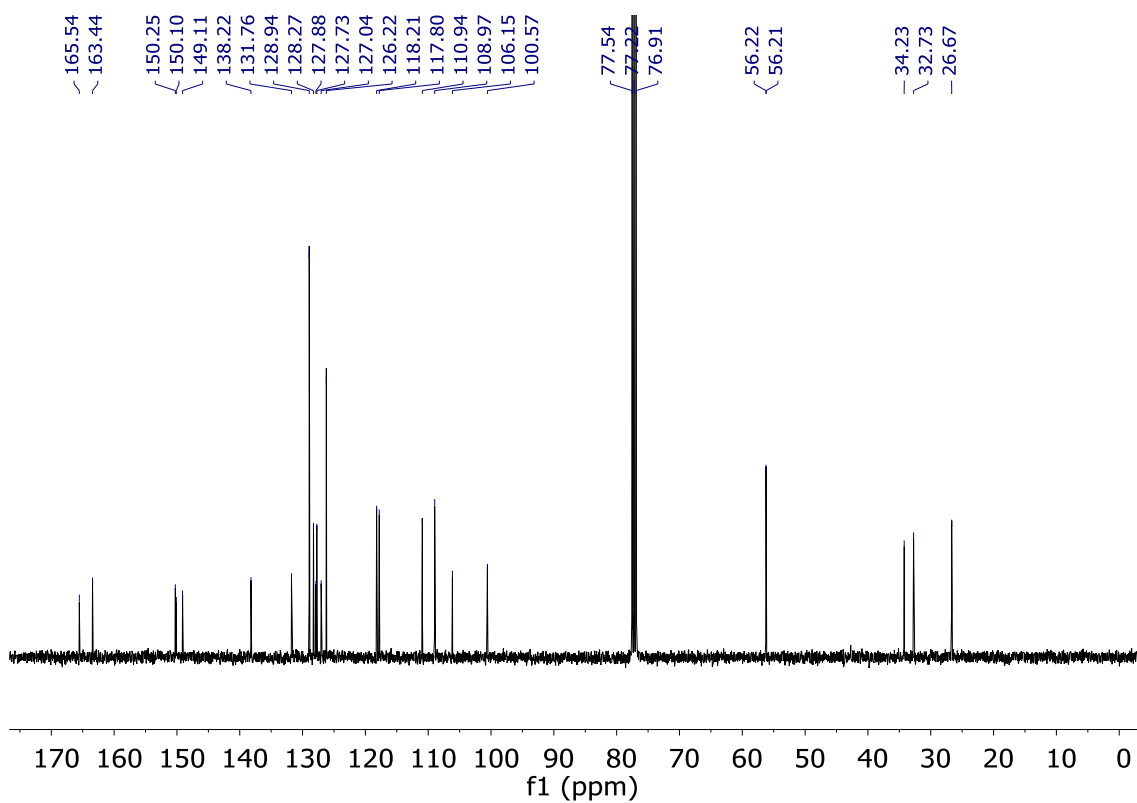

**Figure S72.**  $^{13}\text{C}$ -NMR spectrum of compound **68a** in  $\text{CDCl}_3$

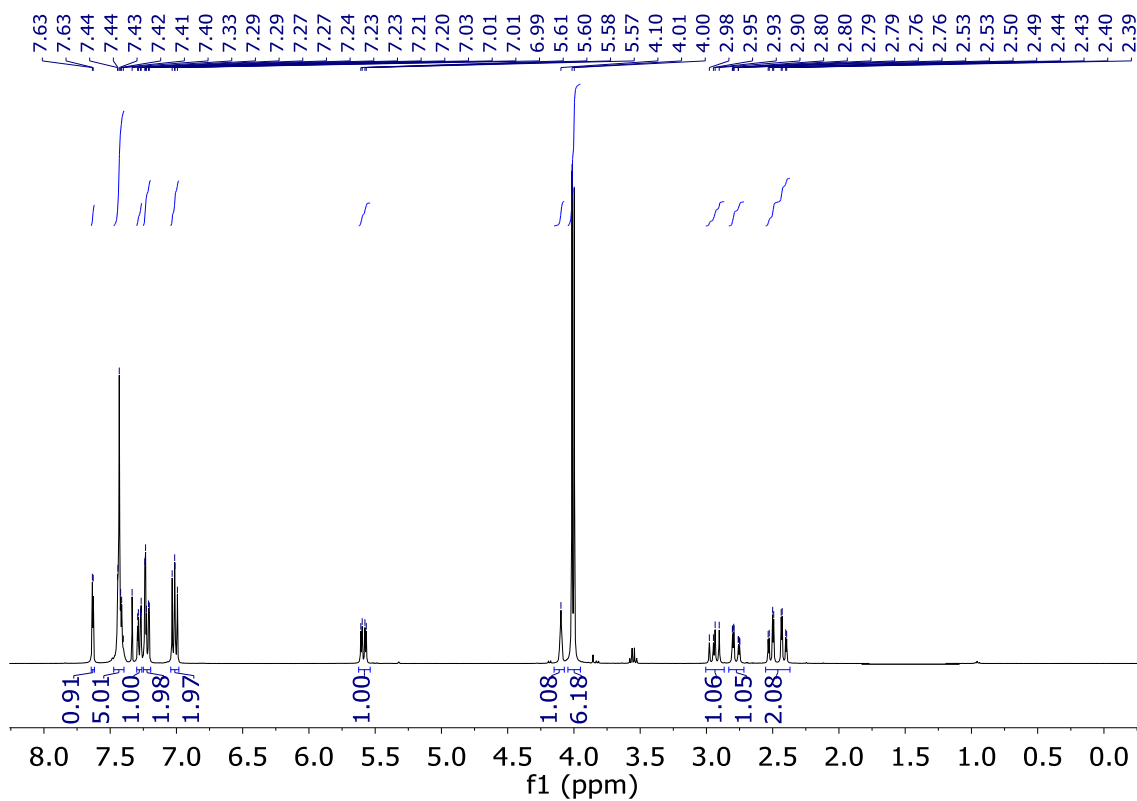

**Figure S73.** <sup>1</sup>H-NMR spectrum of compound **68b** in CDCl<sub>3</sub>

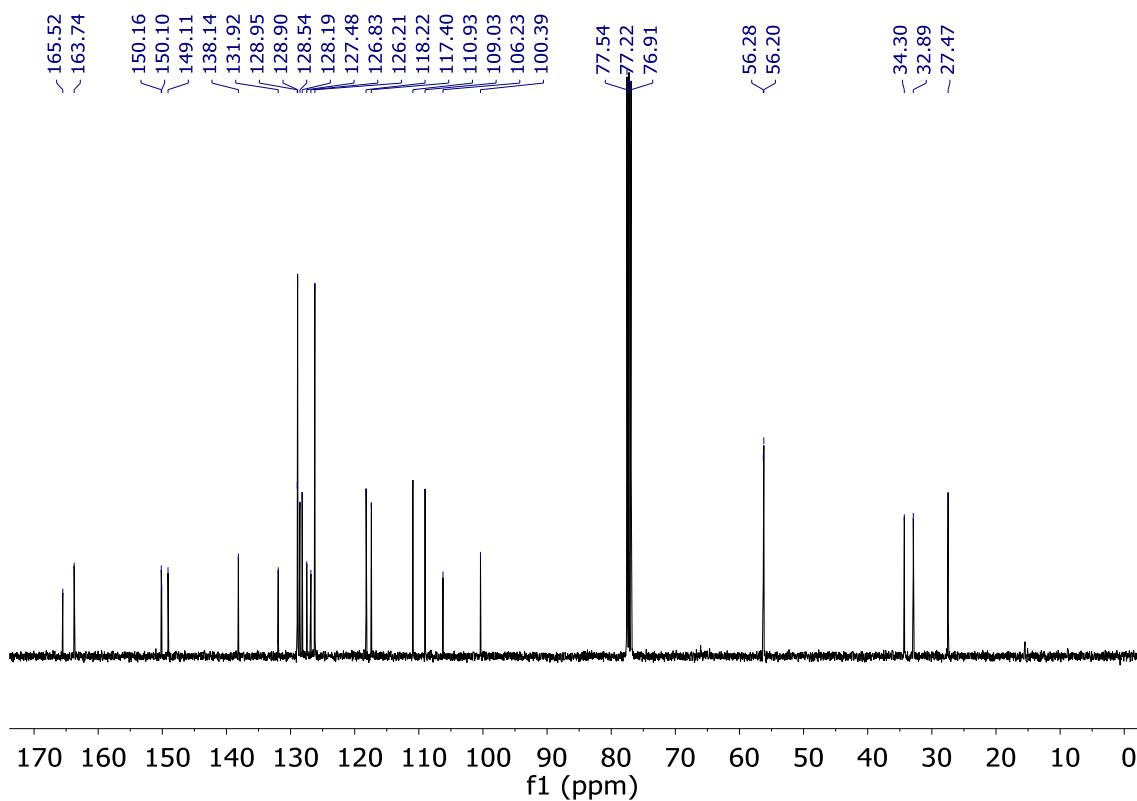

**Figure S74.** <sup>13</sup>C-NMR spectrum of compound **68b** in CDCl<sub>3</sub>

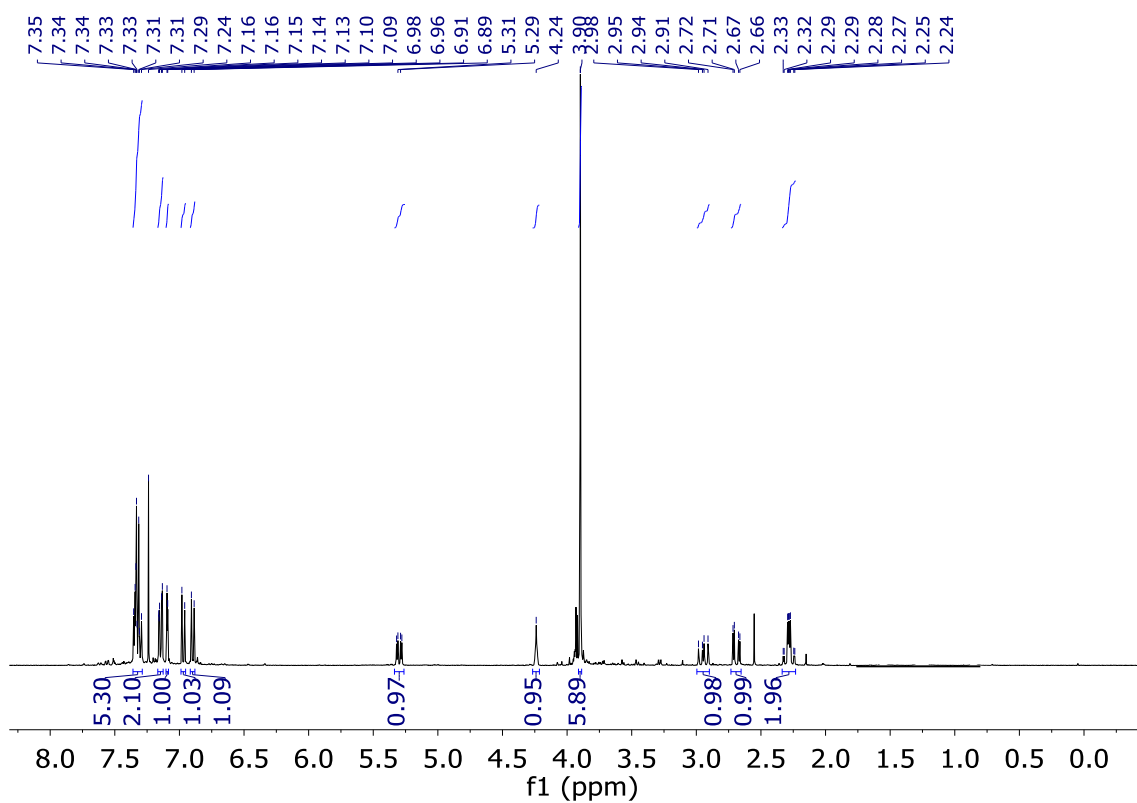

**Figure S75.** <sup>1</sup>H-NMR spectrum of compound **69a** in CDCl<sub>3</sub>

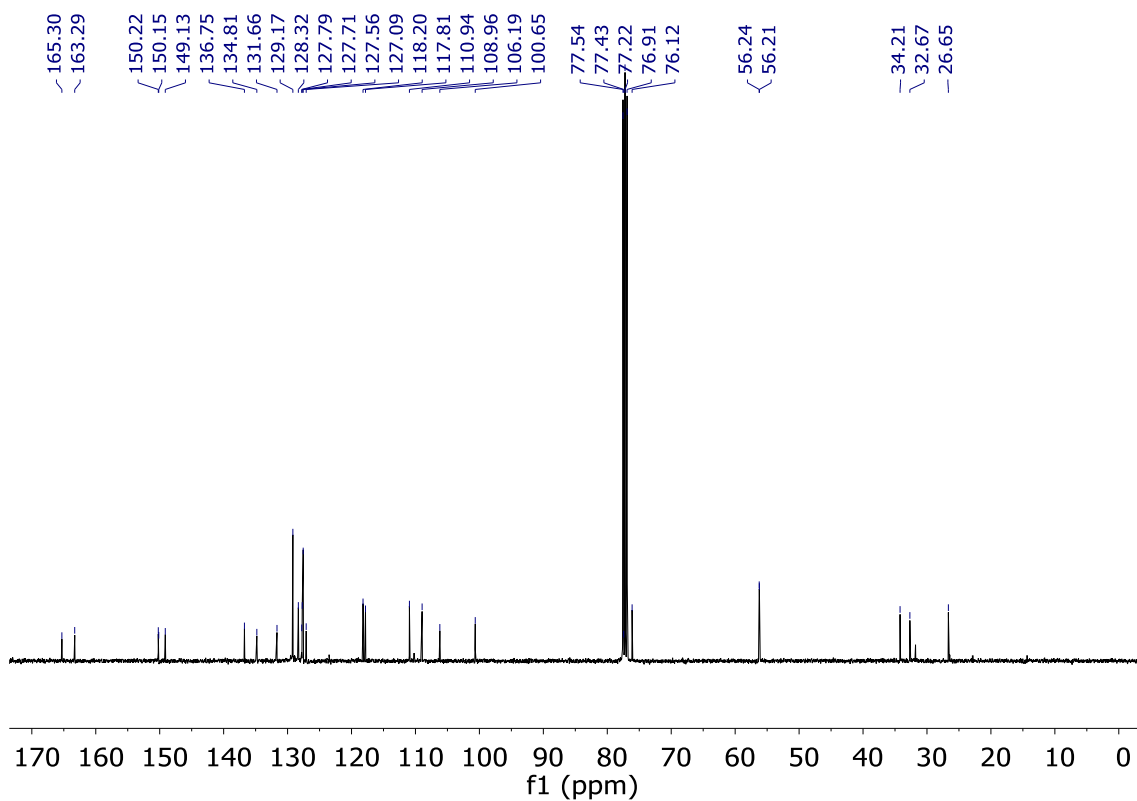

**Figure S76.** <sup>13</sup>C-NMR spectrum of compound **69a** in CDCl<sub>3</sub>

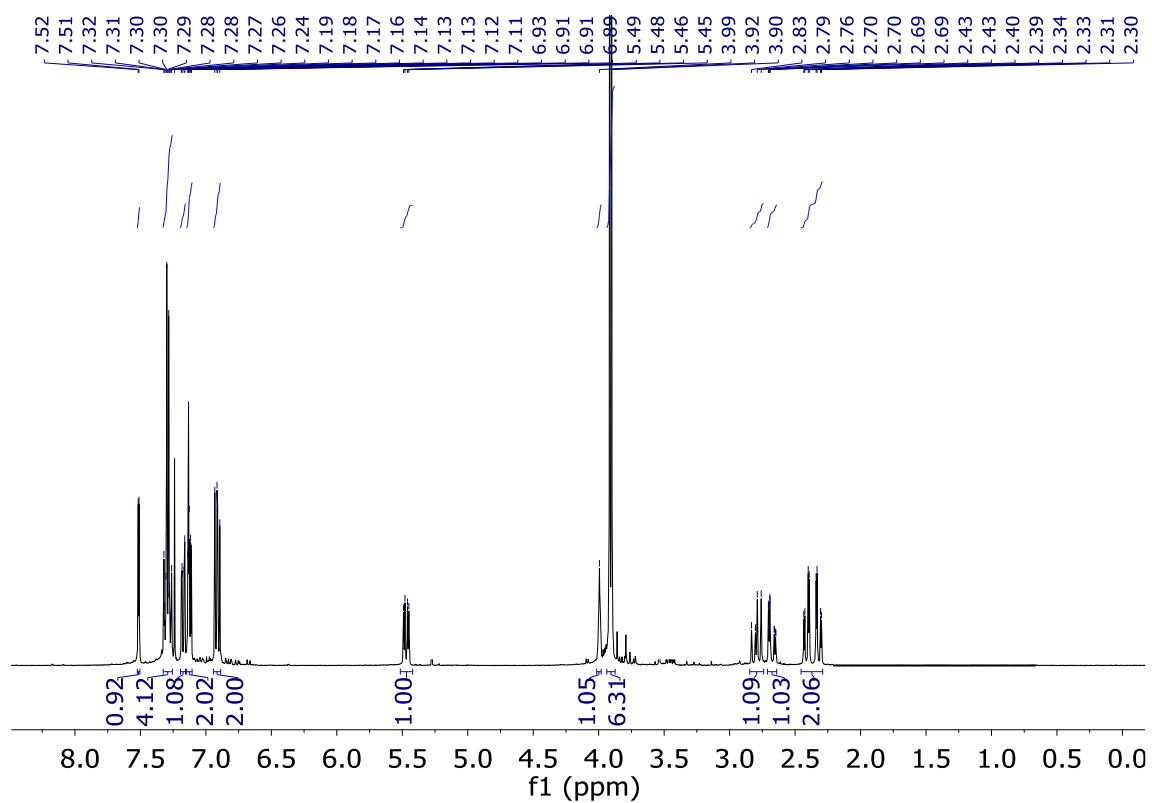

**Figure S77.**  $^1\text{H}$ -NMR spectrum of compound **69b** in  $\text{CDCl}_3$

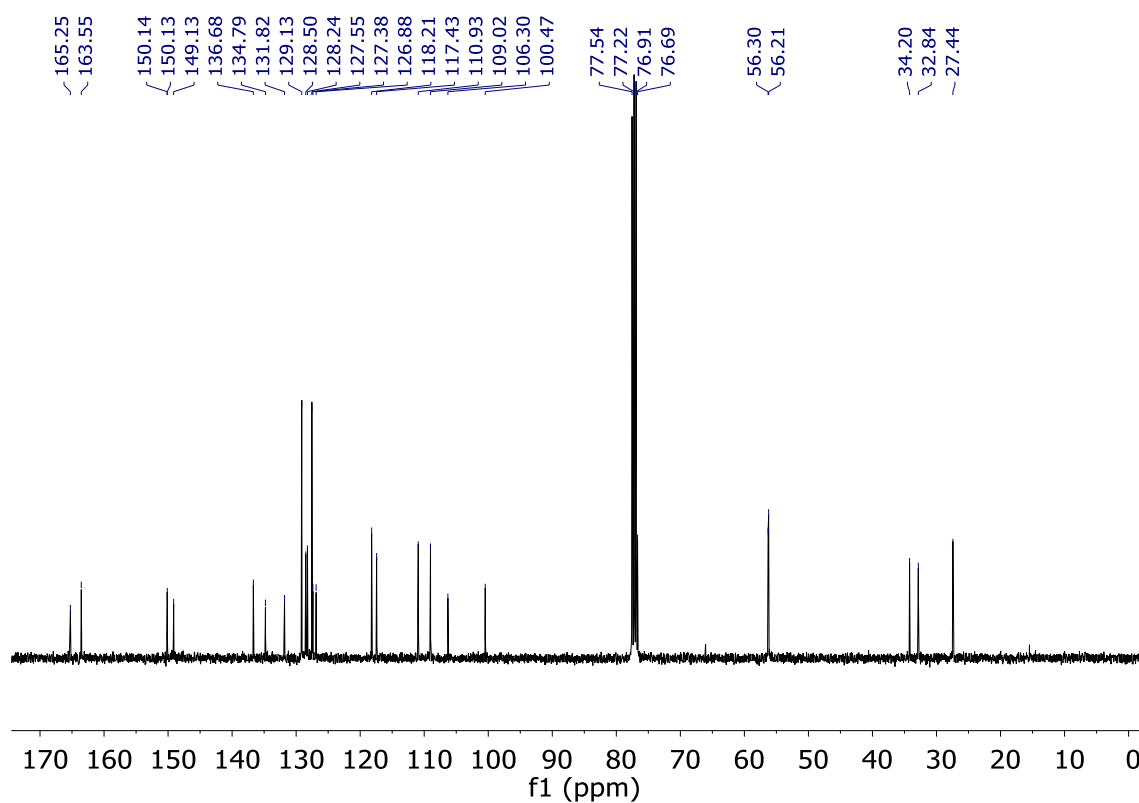

**Figure S78.**  $^{13}\text{C}$ -NMR spectrum of compound **69b** in  $\text{CDCl}_3$

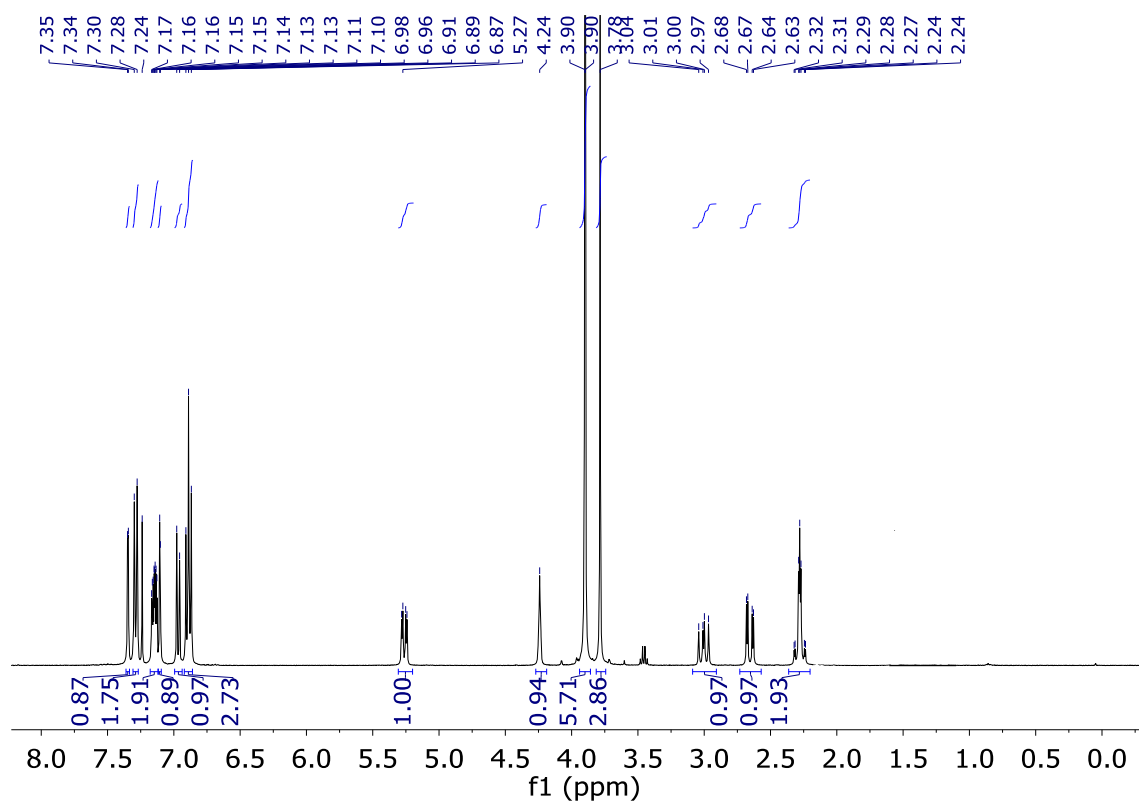

**Figure S79.**  $^1\text{H}$ -NMR spectrum of compound **70a** in  $\text{CDCl}_3$

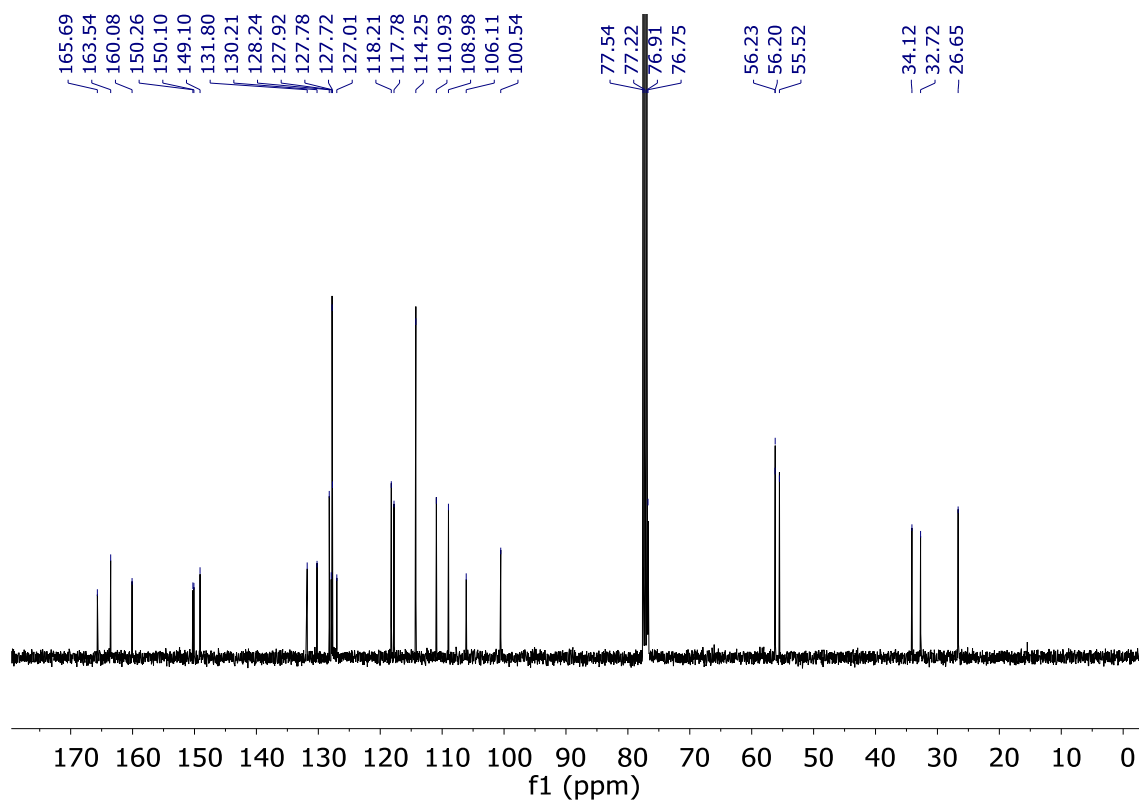

**Figure S80.**  $^{13}\text{C}$ -NMR spectrum of compound **70a** in  $\text{CDCl}_3$

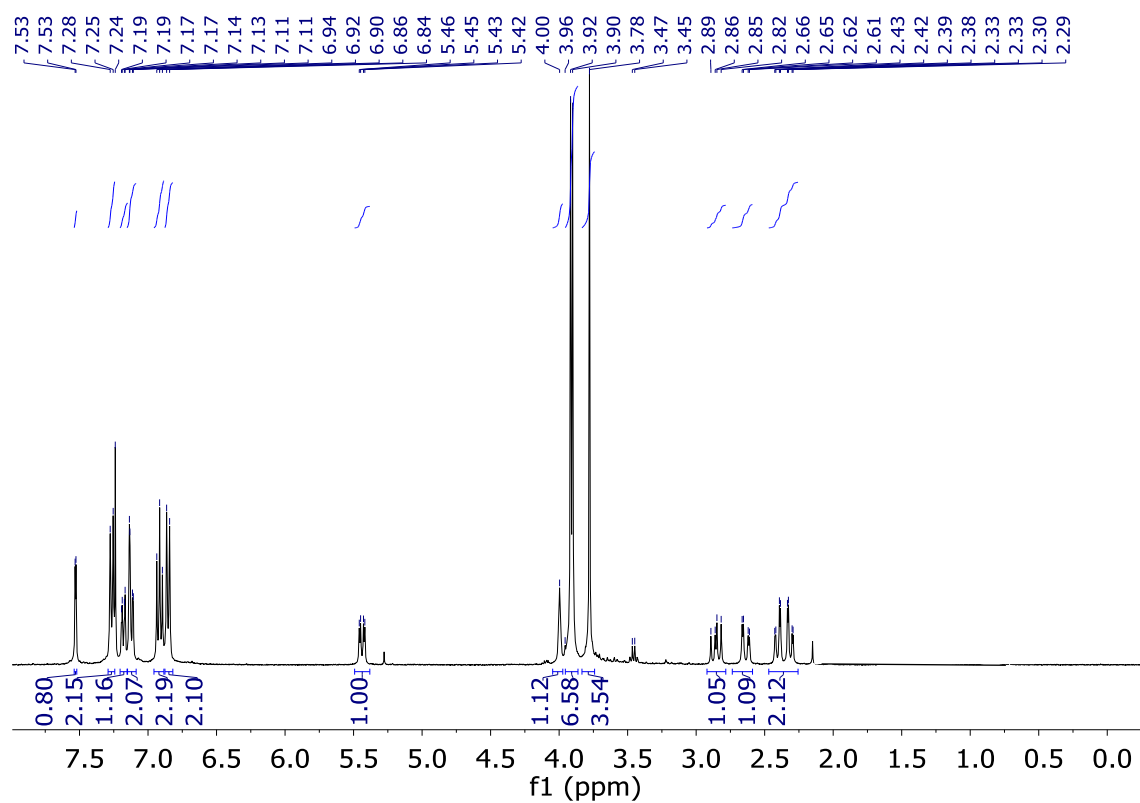

**Figure S81.** <sup>1</sup>H-NMR spectrum of compound **70b** in CDCl<sub>3</sub>

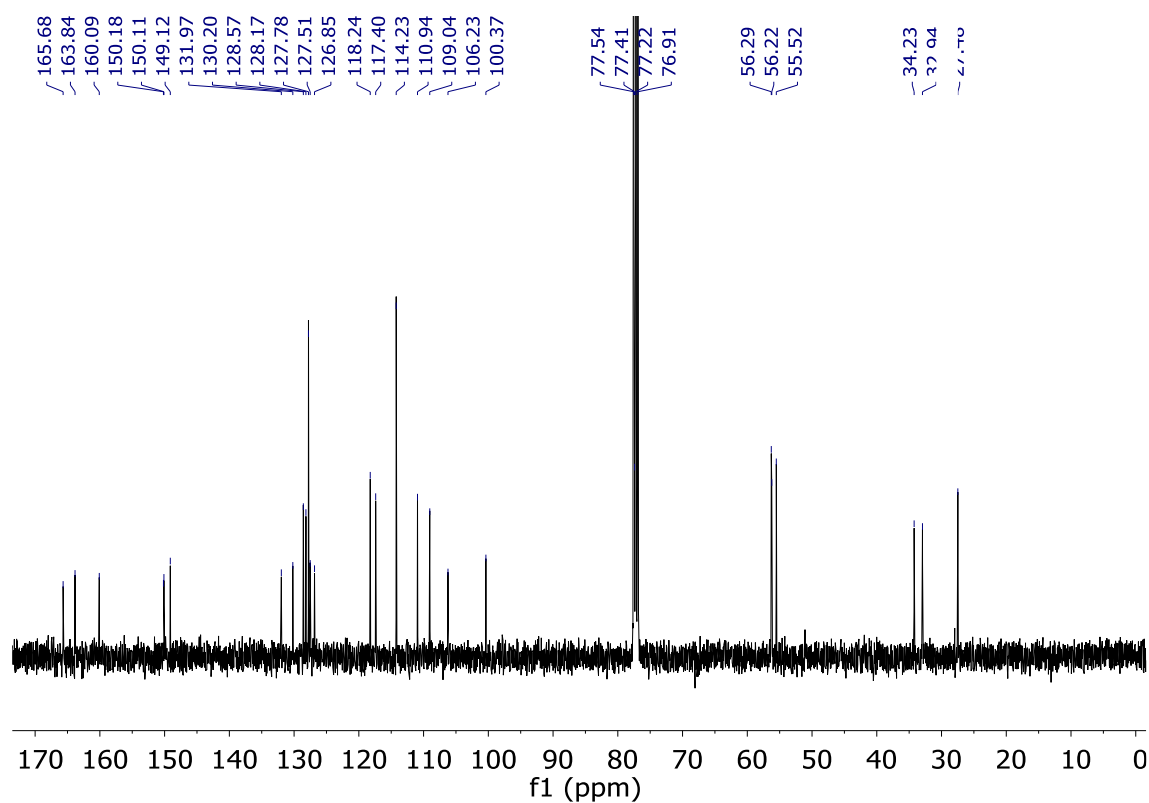

**Figure S82.** <sup>13</sup>C-NMR spectrum of compound **70b** in CDCl<sub>3</sub>

## 2. HPLC chromatograms

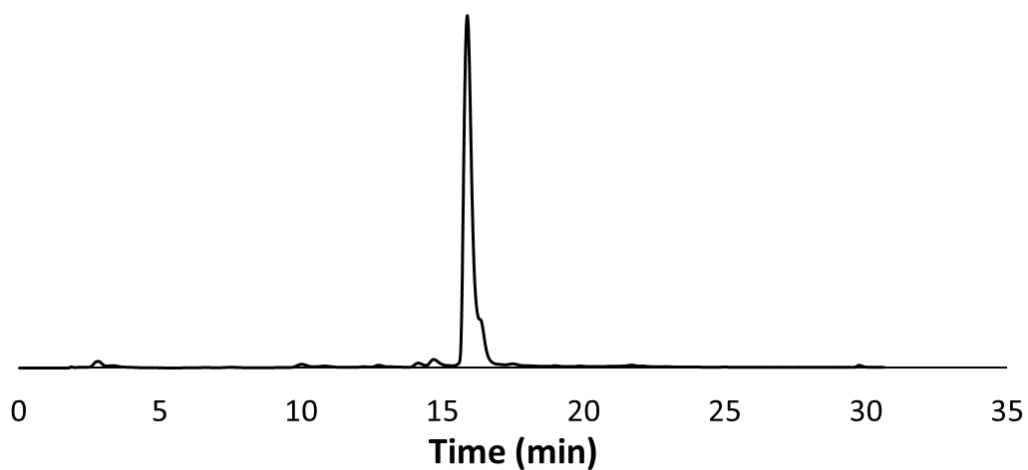

**Figure S83.** HPLC Chromatogram at 280 nm of compound **1** (r.t. = 15.9 min). Purity 98%

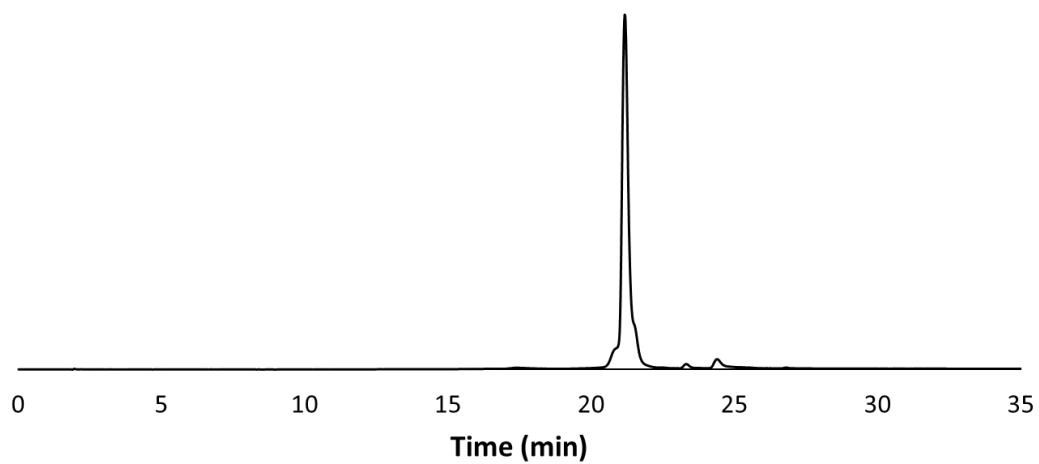

**Figure S84.** HPLC Chromatogram at 280 nm of compound **2** (r.t. = 21.2 min). Purity 97%

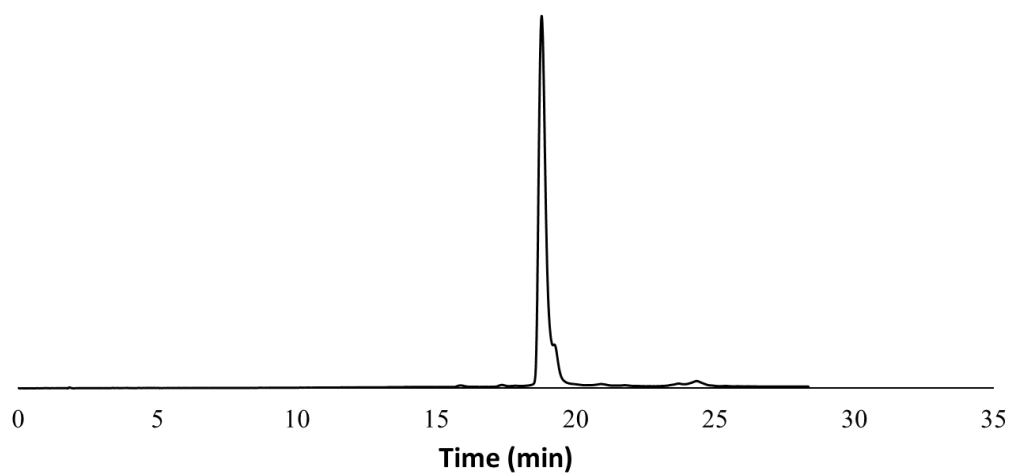

**Figure S85.** HPLC Chromatogram at 280 nm of compound **3** (r.t. = 18.8 min). Purity 98%

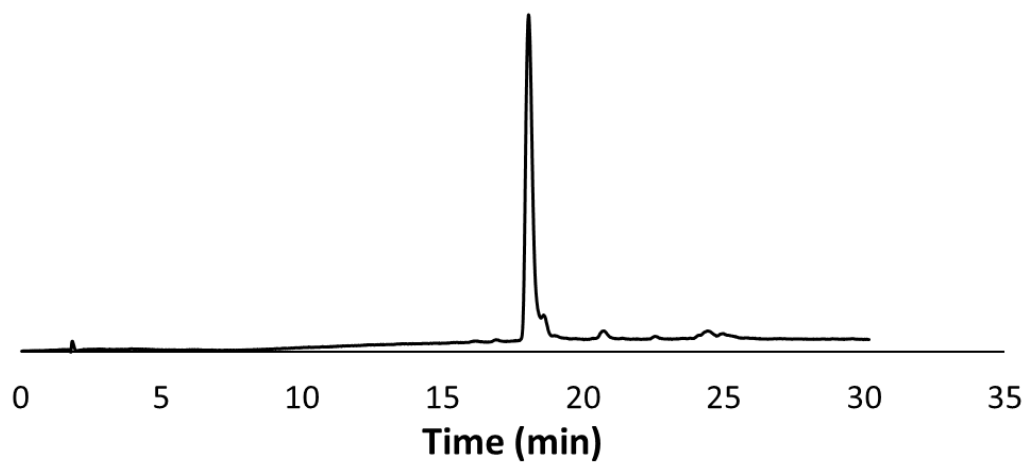

**Figure S86.** HPLC Chromatogram at 280 nm of compound **4** (r.t. = 18.0 min). Purity 97%

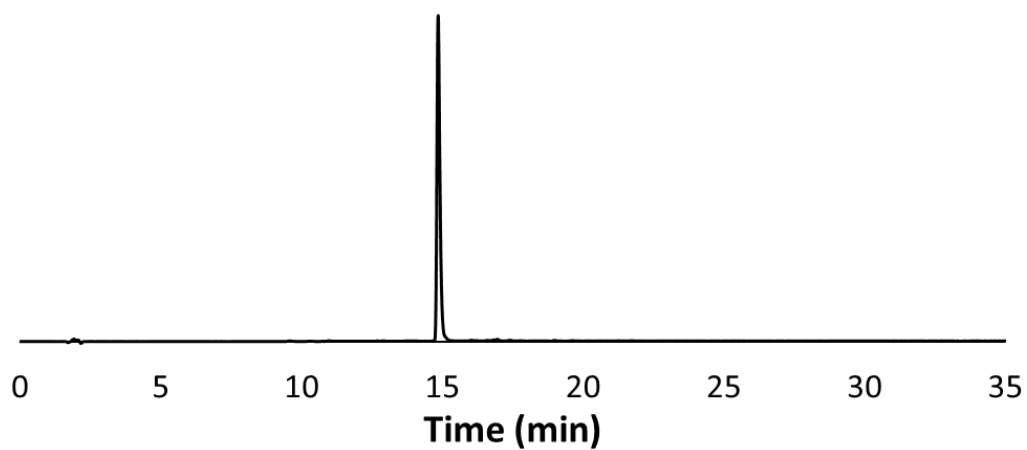

**Figure S87.** HPLC Chromatogram at 280 nm of compound **5** (r.t. = 14.9 min). Purity >99%

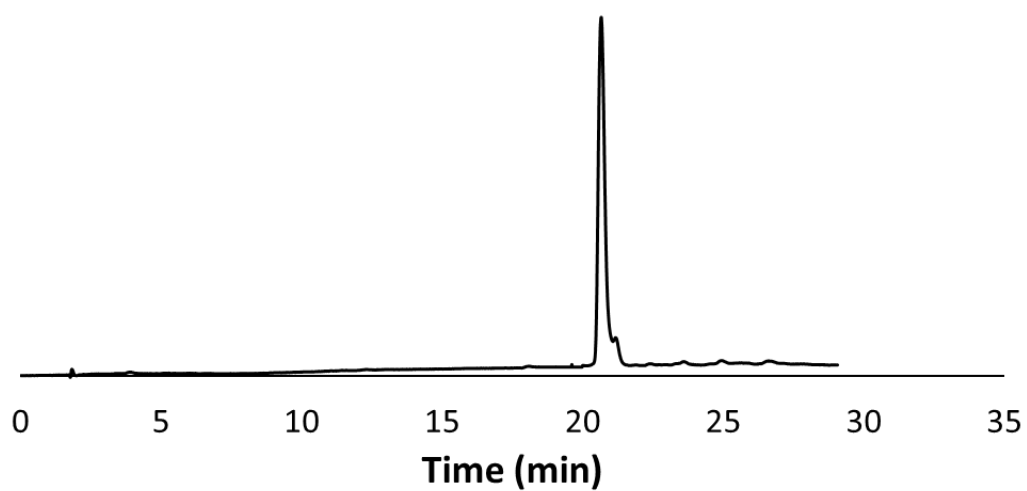

**Figure S88.** HPLC Chromatogram at 280 nm of compound **6** (r.t. = 20.7 min). Purity 98%



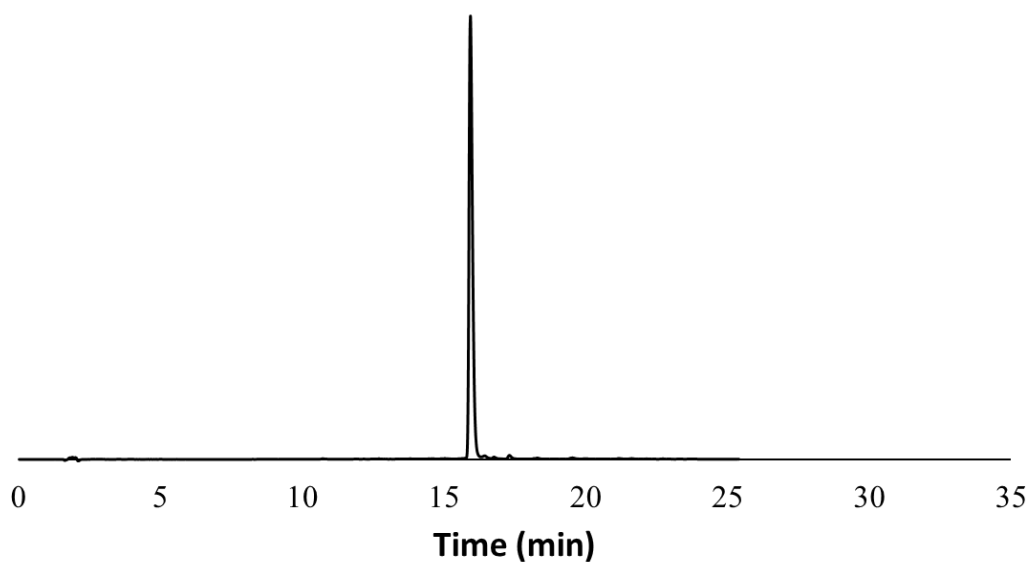

**Figure S89.** HPLC Chromatogram at 280 nm of compound **42** (r.t. = 15.9 min). Purity >99%

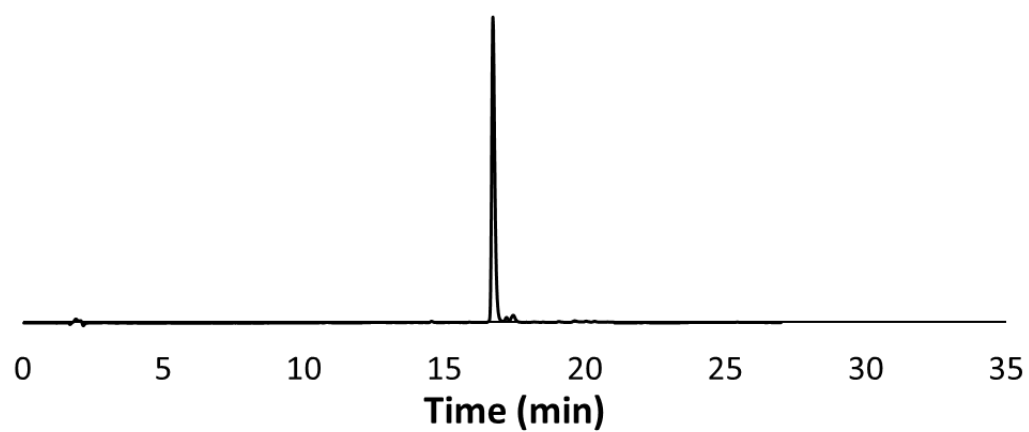

**Figure S90.** HPLC Chromatogram at 280 nm of compound **43** (r.t. = 16.7 min). Purity 98%

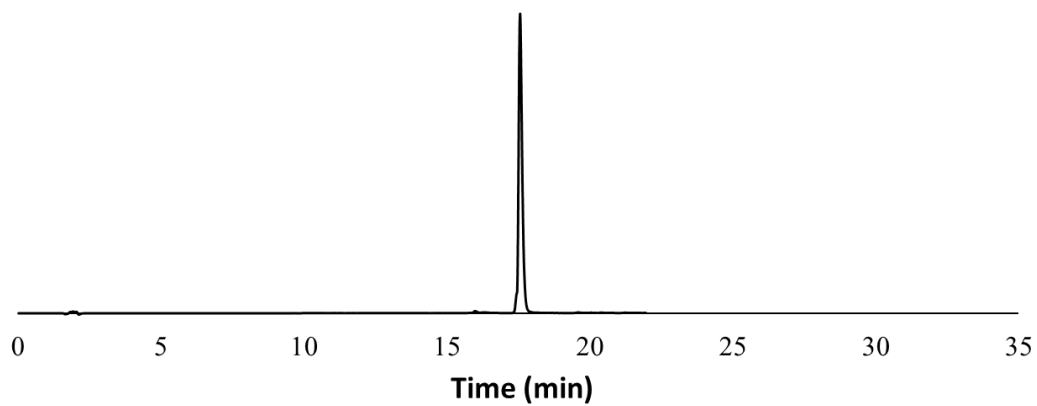

**Figure S91.** HPLC Chromatogram at 280 nm of compound **44** (r.t. = 17.6 min). Purity >99%

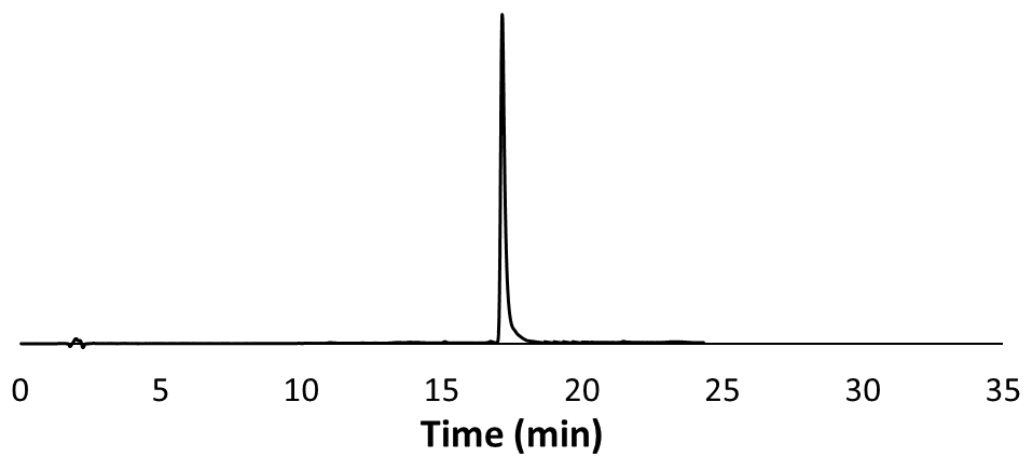

**Figure S92.** HPLC Chromatogram at 280 nm of compound **45** (r.t. = 17.2 min). Purity >99%

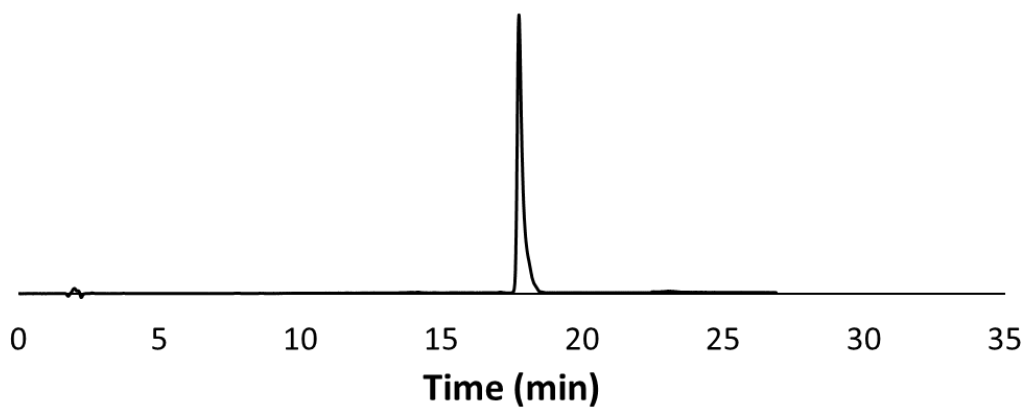

**Figure S93.** HPLC Chromatogram at 280 nm of compound **46** (r.t. = 17.8 min). Purity 99%

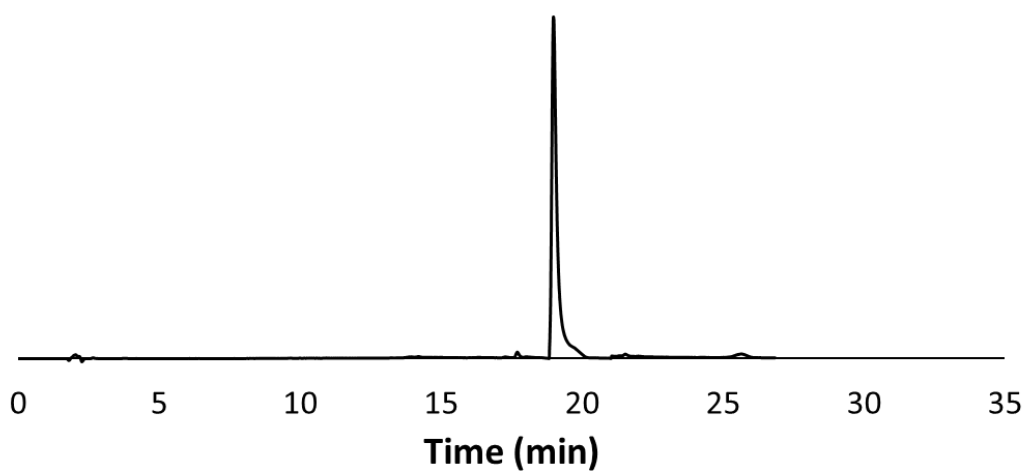

**Figure S94.** HPLC Chromatogram at 280 nm of compound **47** (r.t. = 19.0 min). Purity 98%

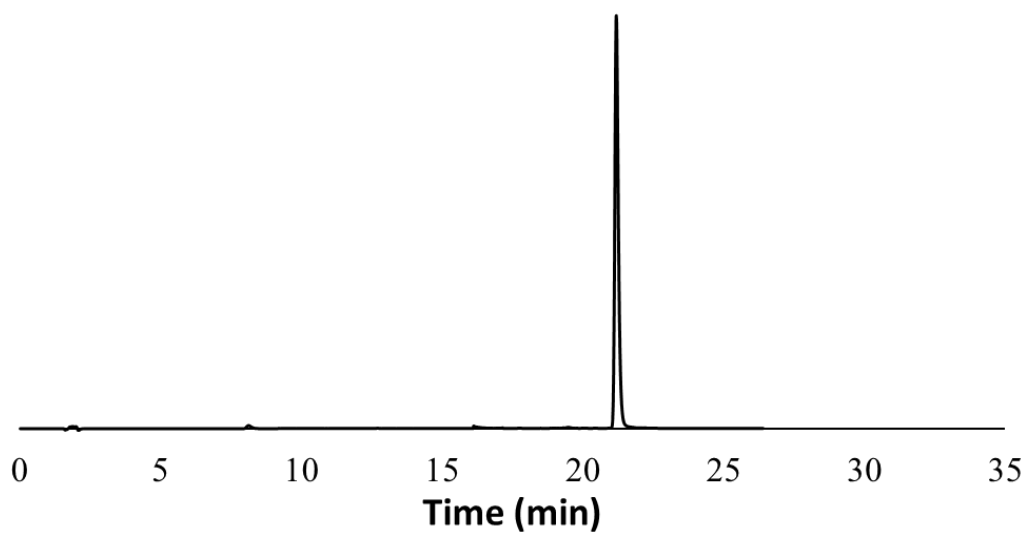

**Figure S95.** HPLC Chromatogram at 280 nm of compound **48** (r.t. = 21.2 min). Purity 98%

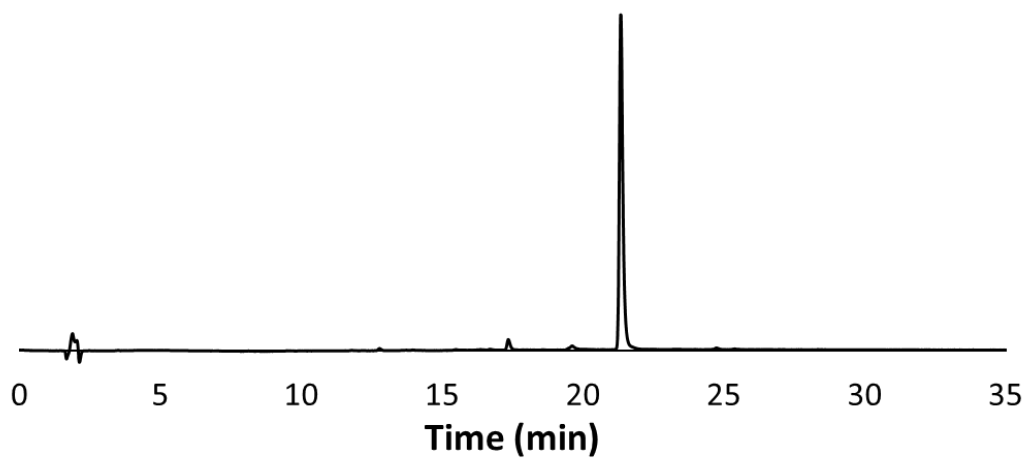

**Figure S96.** HPLC Chromatogram at 280 nm of compound **49** (r.t. = 21.3 min). Purity 97%

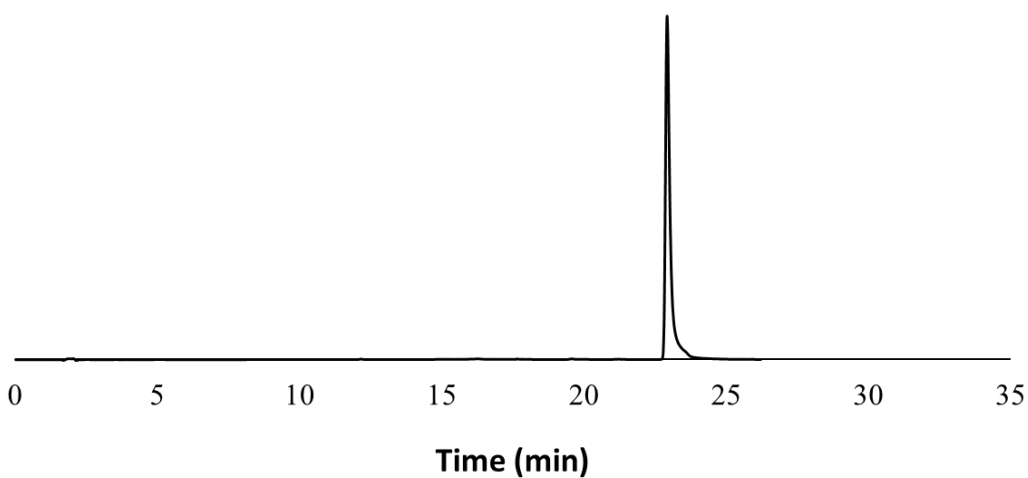

**Figure S97.** HPLC Chromatogram at 280 nm of compound **50** (r.t. = 22.9 min). Purity >99%

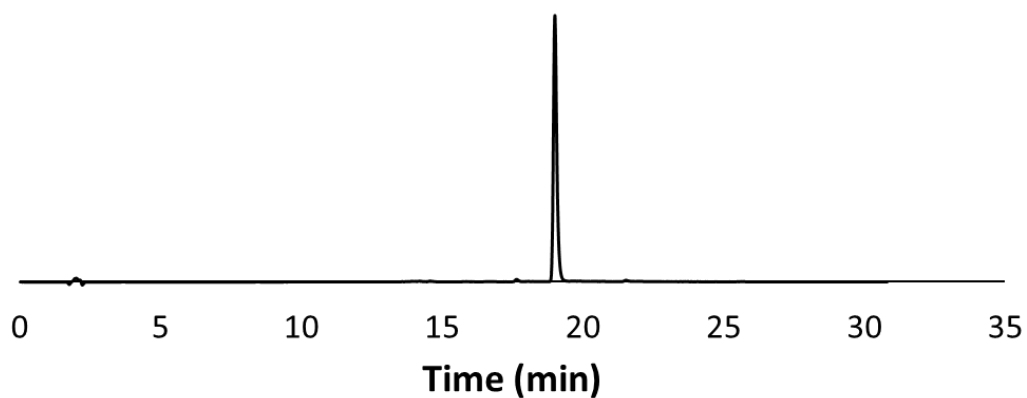

**Figure S98.** HPLC Chromatogram at 280 nm of compound **51** (r.t. = 19.0 min). Purity >99%

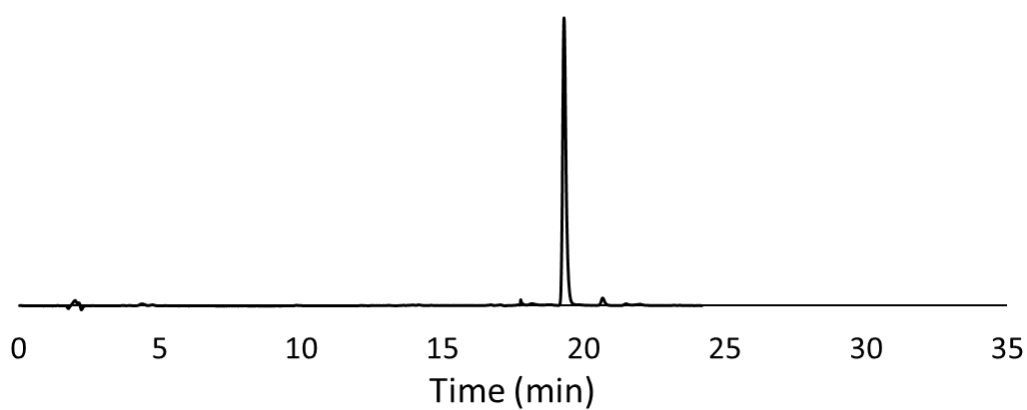

**Figure S99.** HPLC Chromatogram at 280 nm of compound **52** (r.t. = 19.3 min). Purity 98%

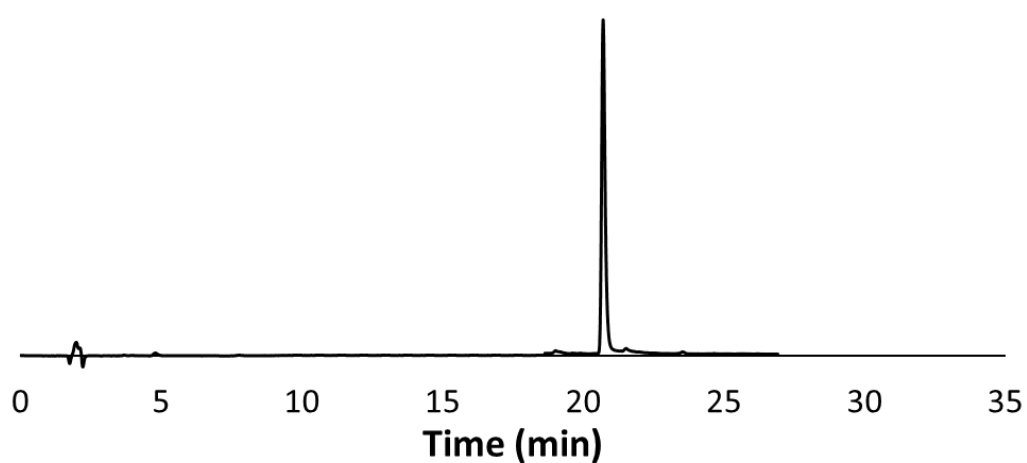

**Figure S100.** HPLC Chromatogram at 280 nm of compound **53** (r.t. = 20.7 min). Purity 98%

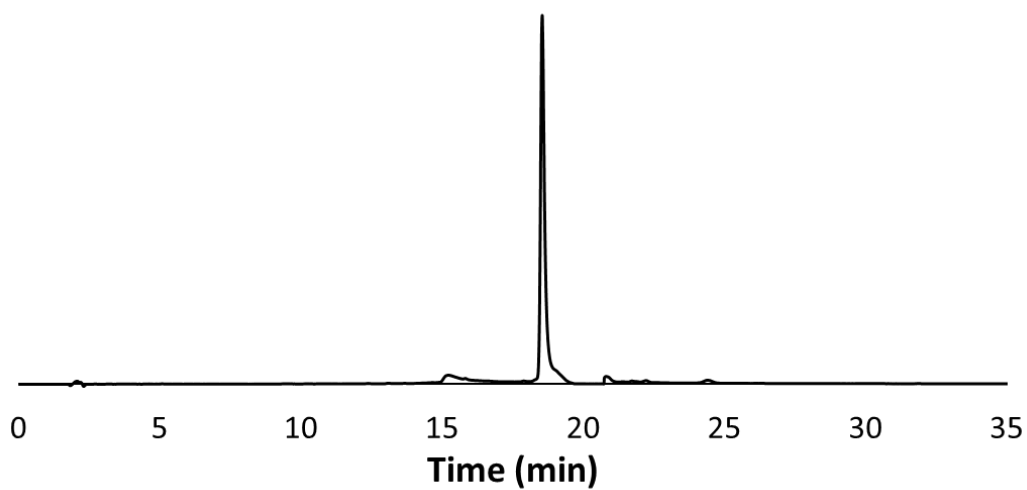

**Figure S101.** HPLC Chromatogram at 280 nm of compound **54** (r.t. = 18.6 min). Purity 97%

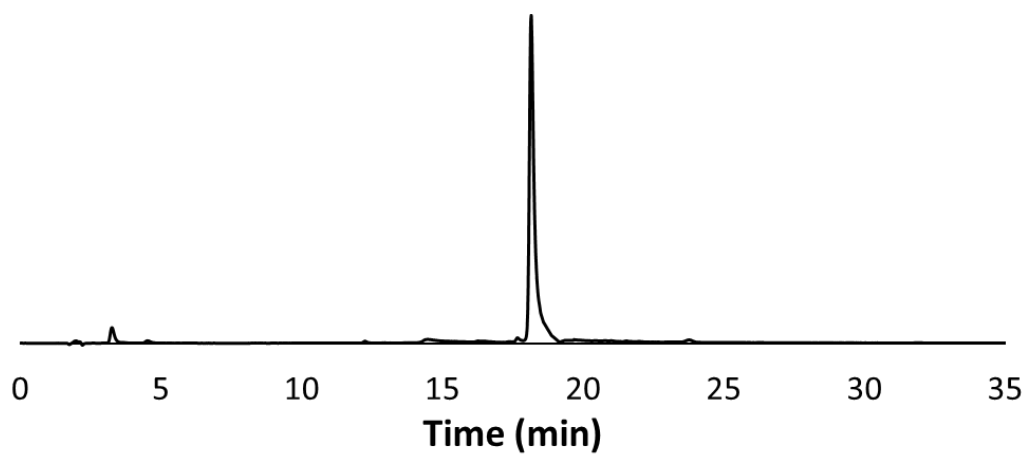

**Figure S102.** HPLC Chromatogram at 280 nm of compound **55** (r.t. = 18.2 min). Purity 98%

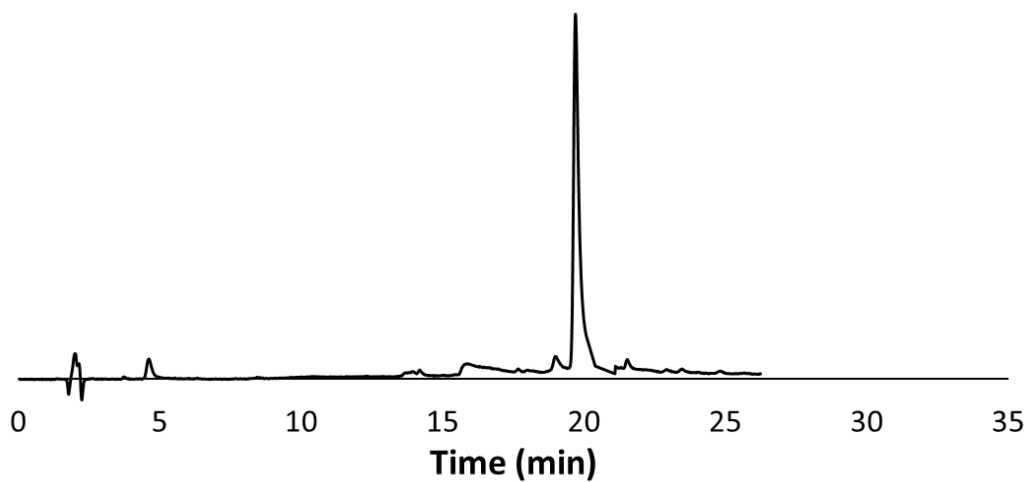

**Figure S103.** HPLC Chromatogram at 280 nm of compound **56** (r.t. = 19.7 min). Purity 95%

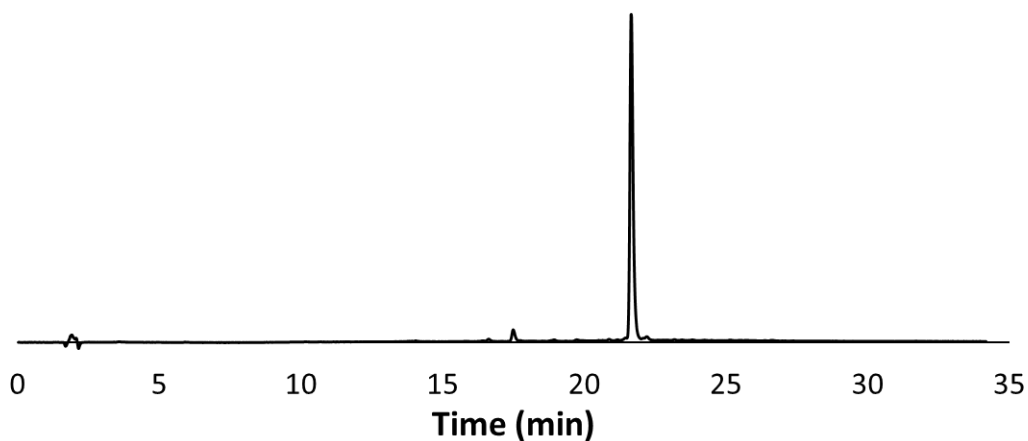

**Figure S104.** HPLC Chromatogram at 280 nm of compound **57** (r.t. = 21.6 min). Purity 97%

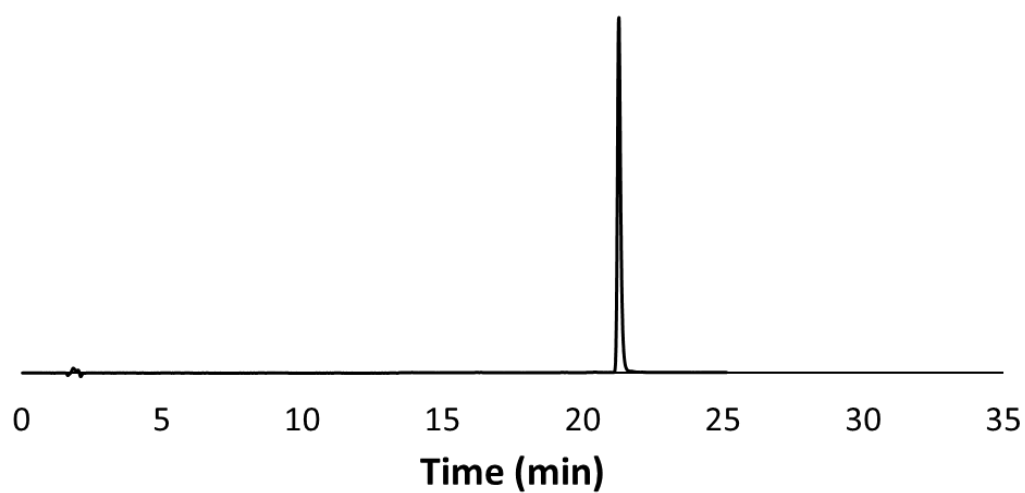

**Figure S105.** HPLC Chromatogram at 280 nm of compound **58** (r.t. = 21.3 min). Purity >99%

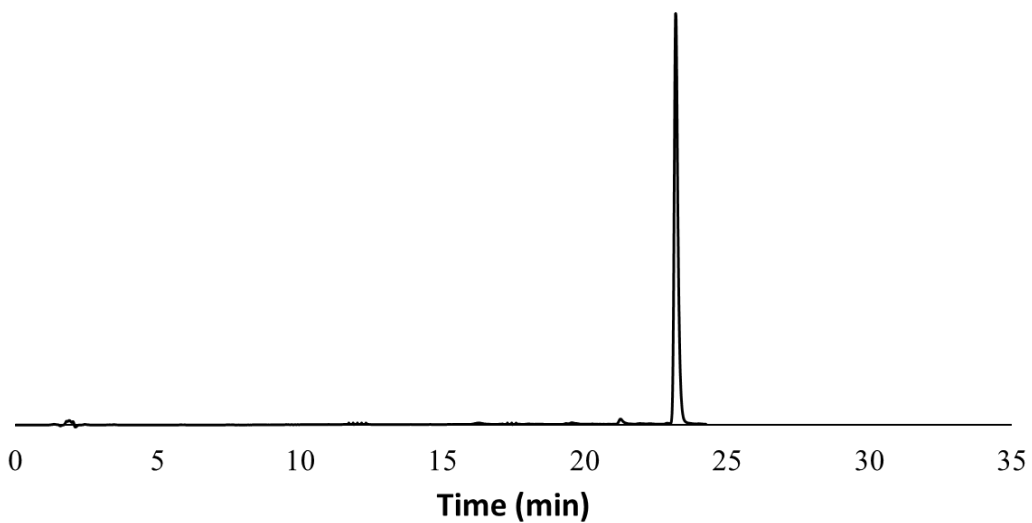

**Figure S106.** HPLC Chromatogram at 280 nm of compound **59** (r.t. = 23.2 min). Purity 98%

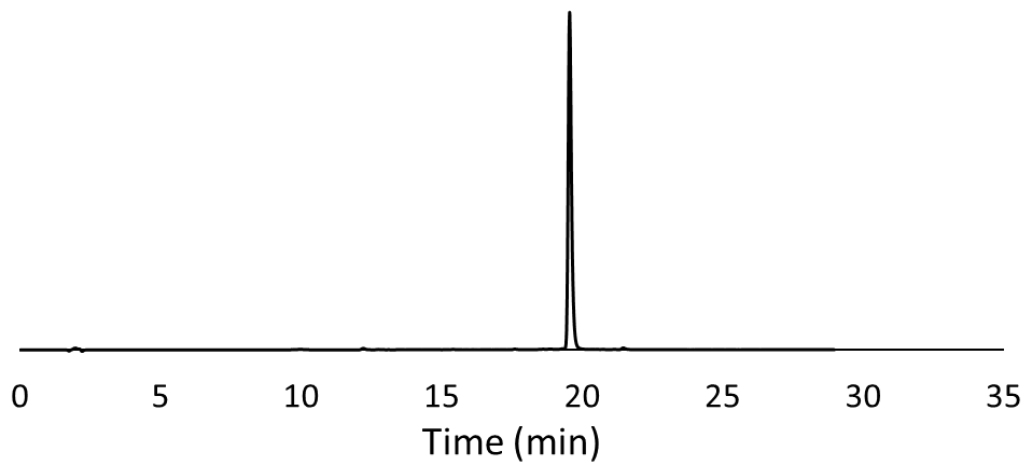

**Figure S107.** HPLC Chromatogram at 280 nm of compound **60** (r.t. = 19.6 min). Purity >99%

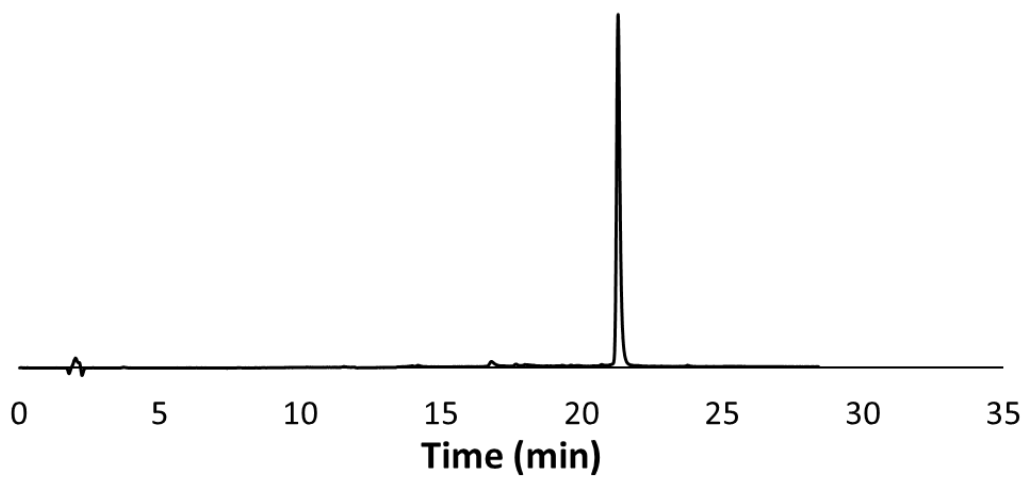

**Figure S108.** HPLC Chromatogram at 280 nm of compound **61** (r.t. = 21.3 min). Purity 99%

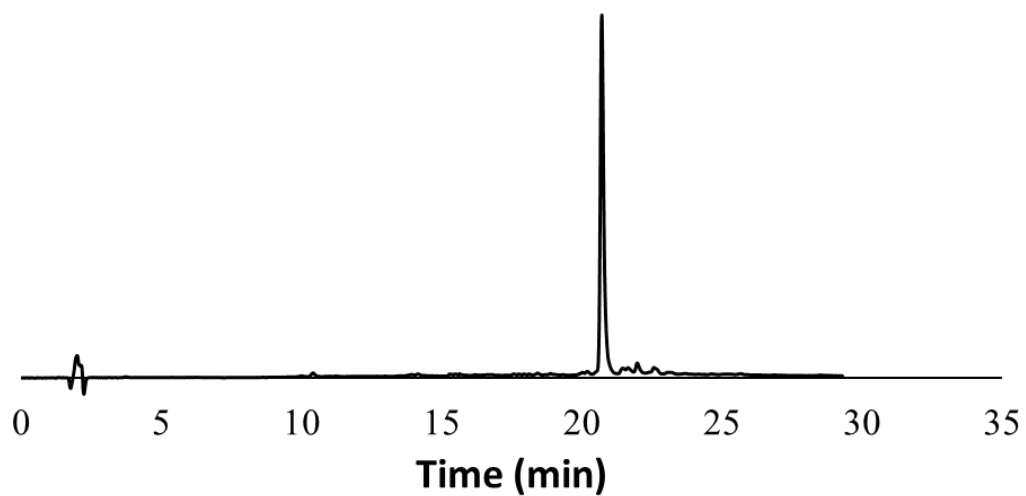

**Figure S109.** HPLC Chromatogram at 280 nm of compound **62a** (r.t. = 20.7 min). Purity 96%

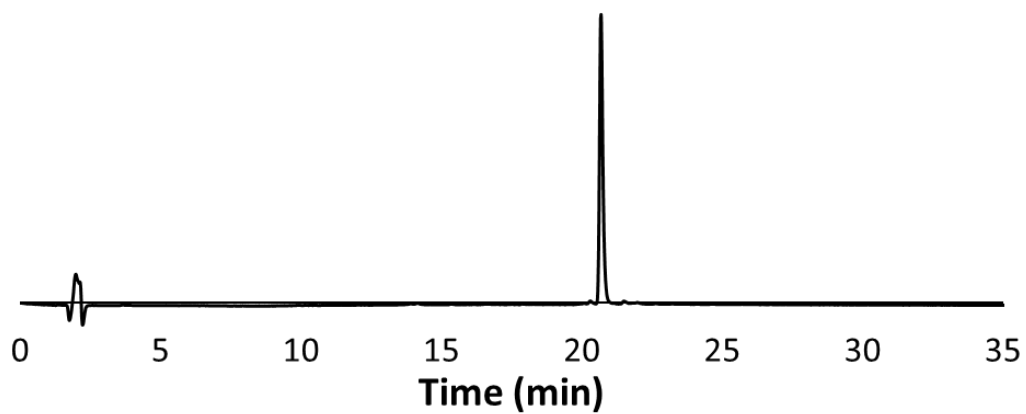

**Figure S110.** HPLC Chromatogram at 280 nm of compound **62b** (r.t. = 20.7 min). Purity >99%

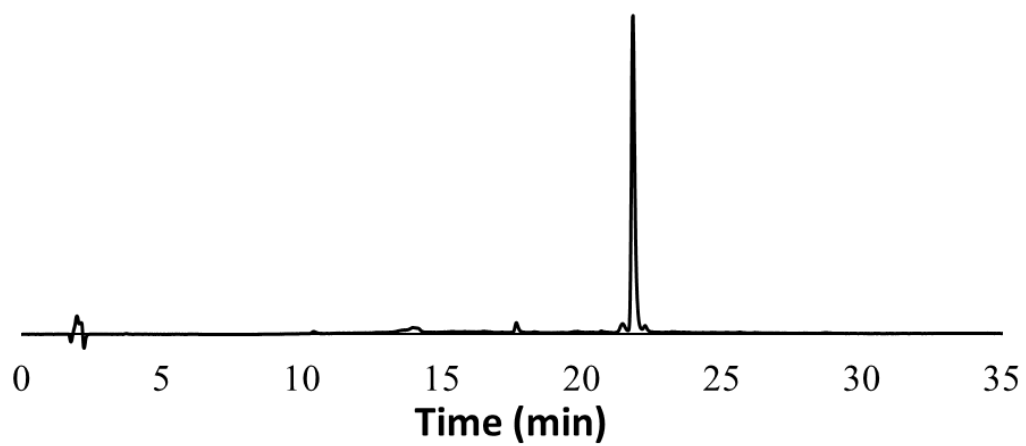

**Figure S111.** HPLC Chromatogram at 280 nm of compound **63a** (r.t. = 21.8 min). Purity 97%

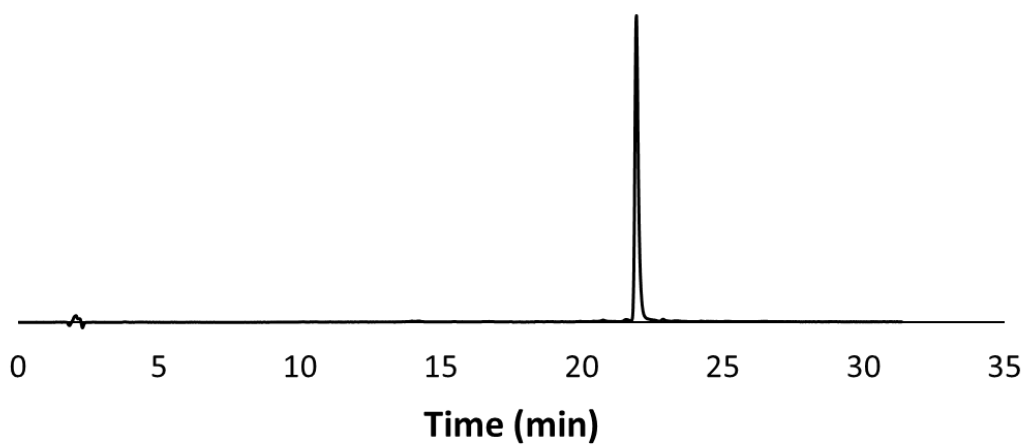

**Figure S112.** HPLC Chromatogram at 280 nm of compound **63b** (r.t. = 21.9 min). Purity >99%



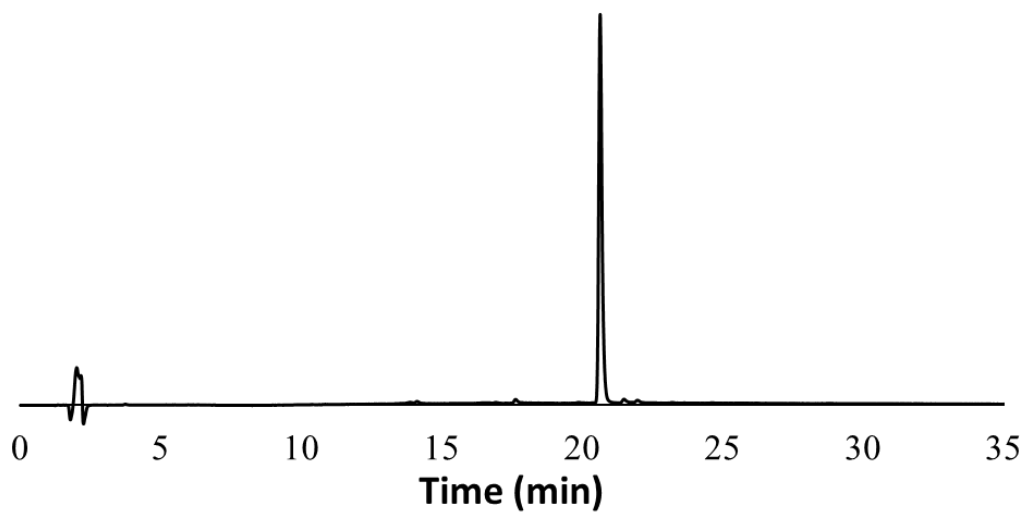

**Figure S113.** HPLC Chromatogram at 280 nm of compound **64a** (r.t. = 20.7 min). Purity 98%

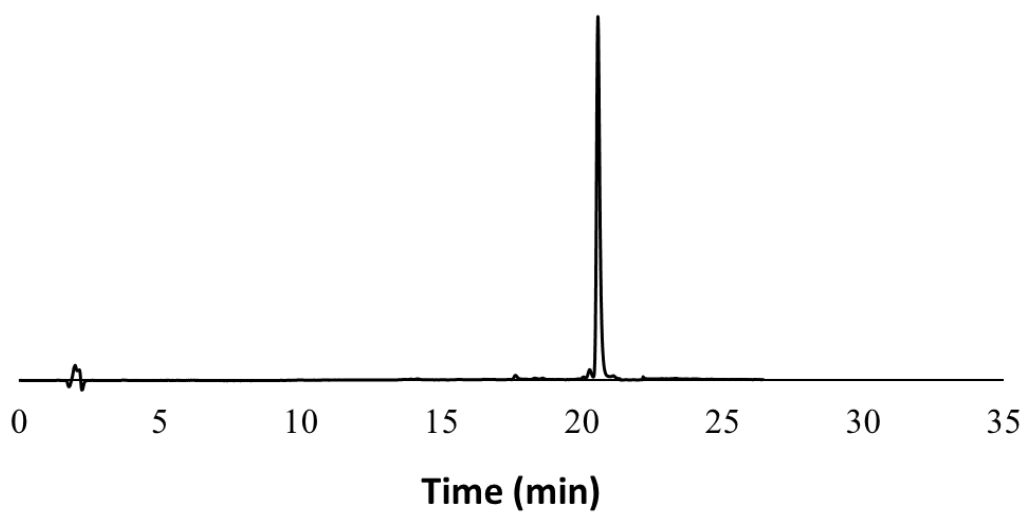

**Figure S114.** HPLC Chromatogram at 280 nm of compound **64b** (r.t. = 20.6 min). Purity 98%

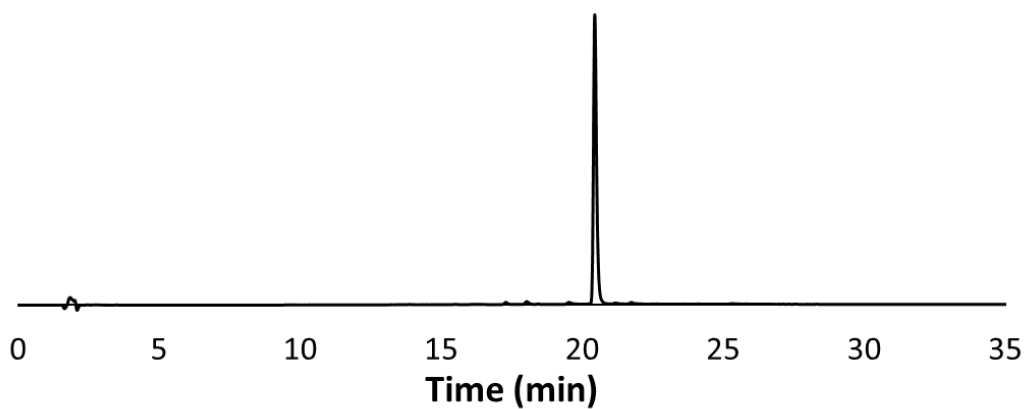

**Figure S115.** HPLC Chromatogram at 280 nm of compound **65a** (r.t. = 20.4 min). Purity 99%

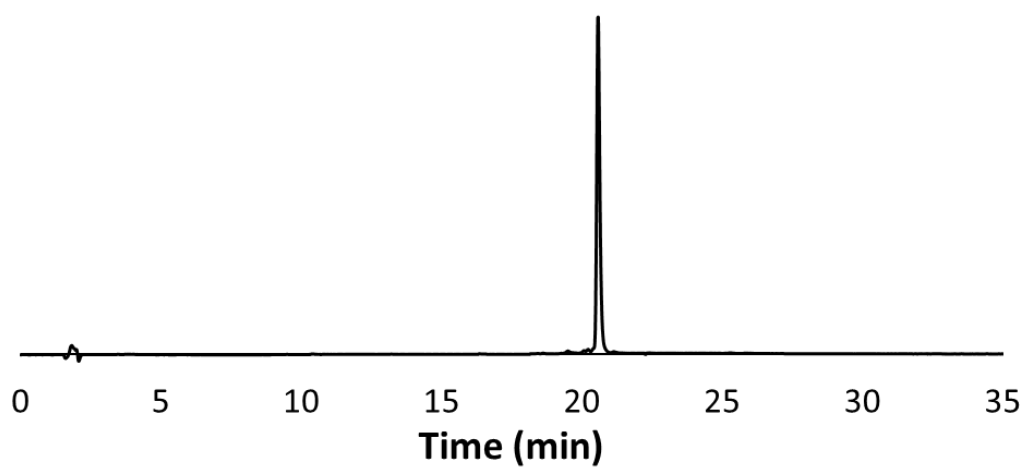

**Figure S116.** HPLC Chromatogram at 280 nm of compound **65b** (r.t. = 20.6 min). Purity >99%

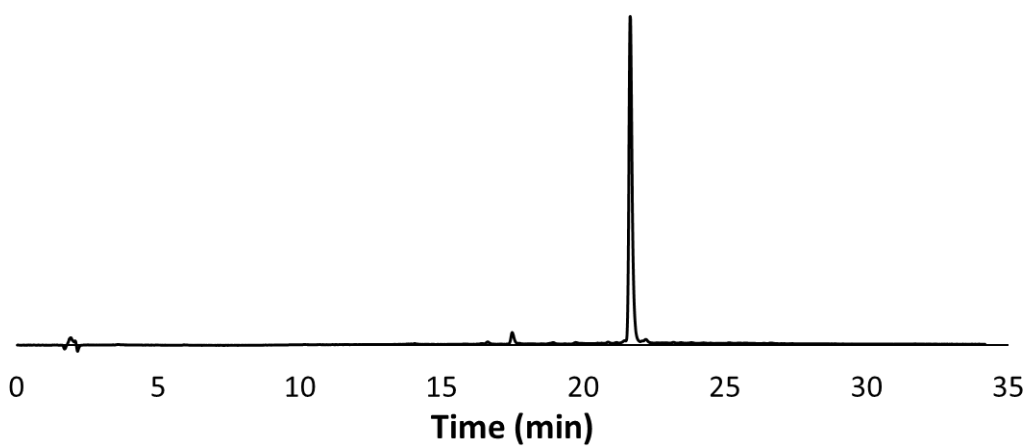

**Figure S117.** HPLC Chromatogram at 280 nm of compound **66a** (r.t. = 21.7 min). Purity 97%

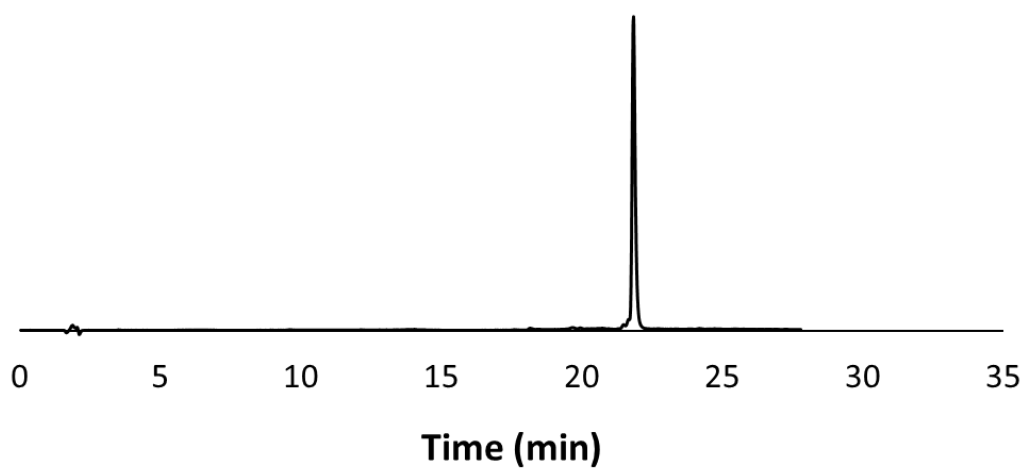

**Figure S118.** HPLC Chromatogram at 280 nm of compound **66b** (r.t. = 21.8 min). Purity >99%

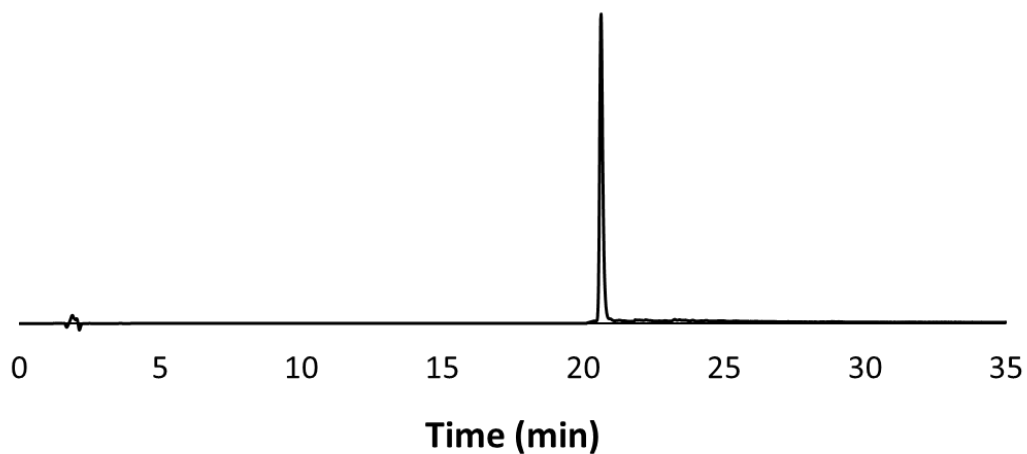

**Figure S119.** HPLC Chromatogram at 280 nm of compound **67a** (r.t. = 20.6 min). Purity >99%

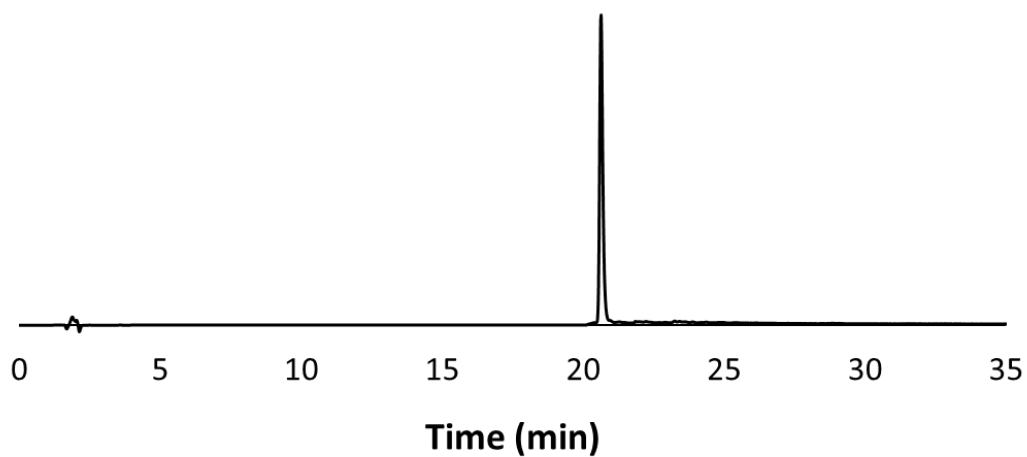

**Figure S120.** HPLC Chromatogram at 280 nm of compound **67b** (r.t. = 20.6 min). Purity >99%

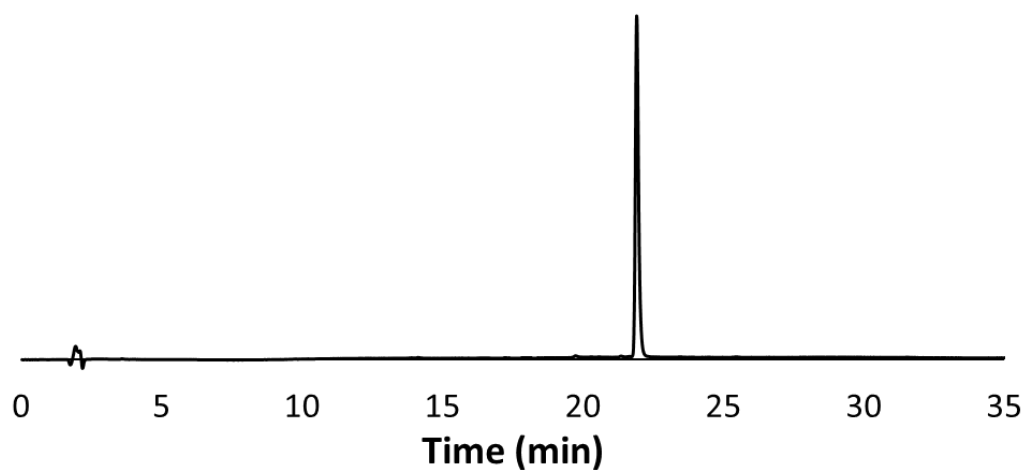

**Figure S121.** HPLC Chromatogram at 280 nm of compound **68a** (r.t. = 21.9 min). Purity >99%

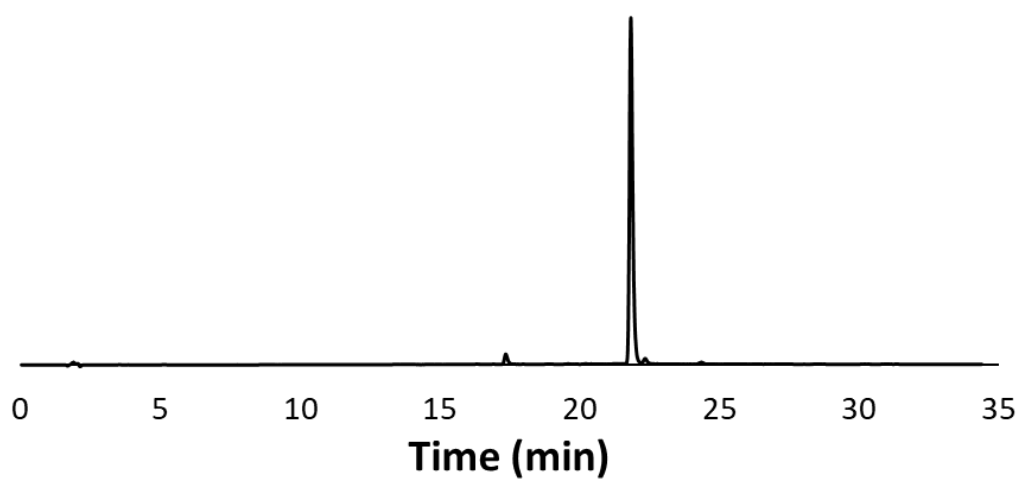

**Figure S122.** HPLC Chromatogram at 280 nm of compound **68b** (r.t. = 21.8 min). Purity 97%

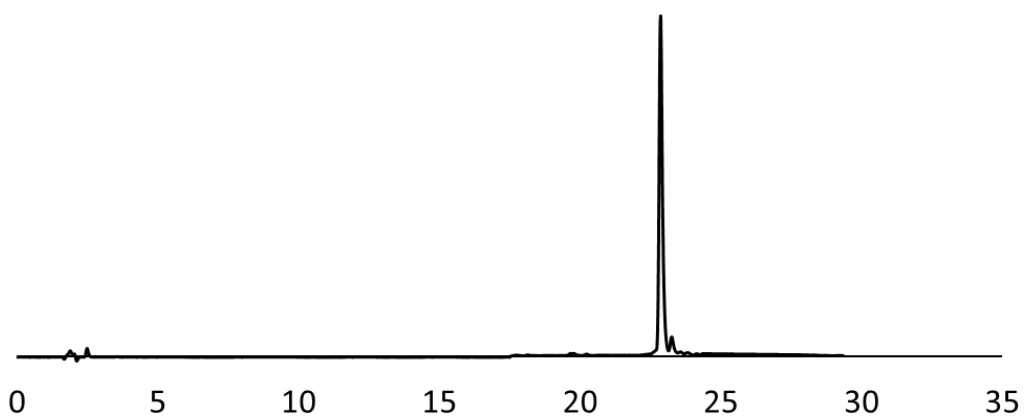

**Figure S123.** HPLC Chromatogram at 280 nm of compound **69a** (r.t. = 22.9 min). Purity 97%

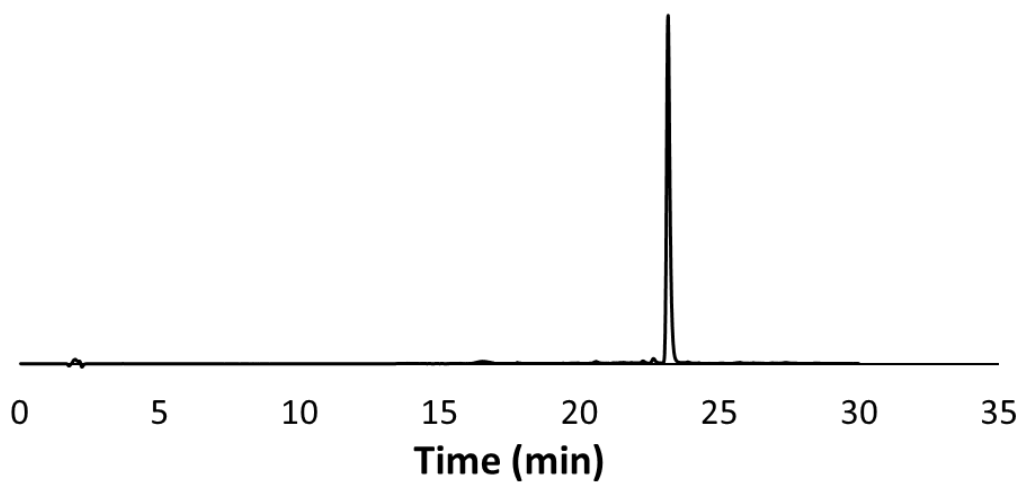

**Figure S124.** HPLC Chromatogram at 280 nm of compound **69b** (r.t. = 23.2 min). Purity 98%

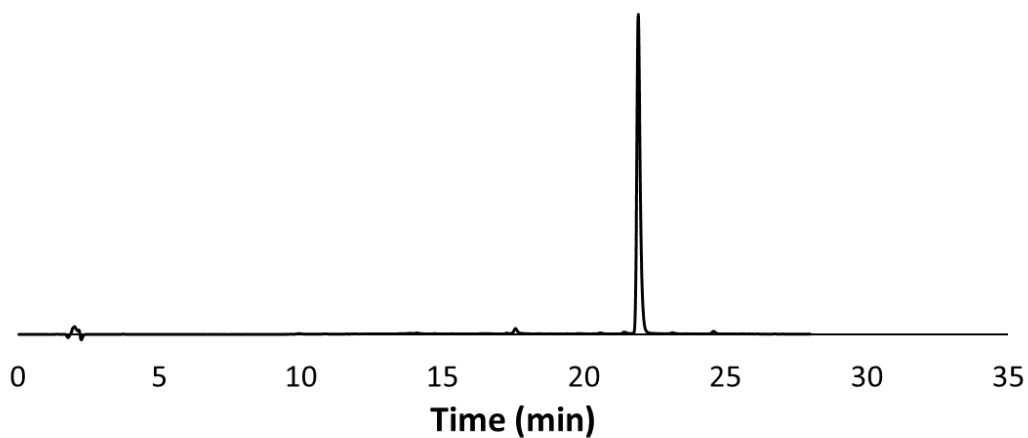

**Figure S125.** HPLC Chromatogram at 280 nm of compound **70a** (r.t. = 21.9 min). Purity 98%

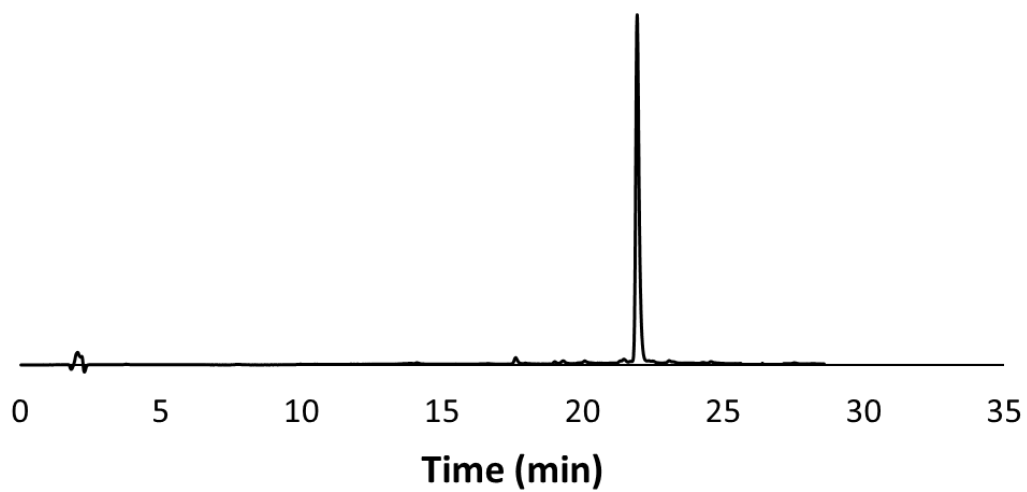

**Figure S126.** HPLC Chromatogram at 280 nm of compound **70b** (r.t. = 21.9 min). Purity 98%

### 3. Quiral HPLC chromatograms

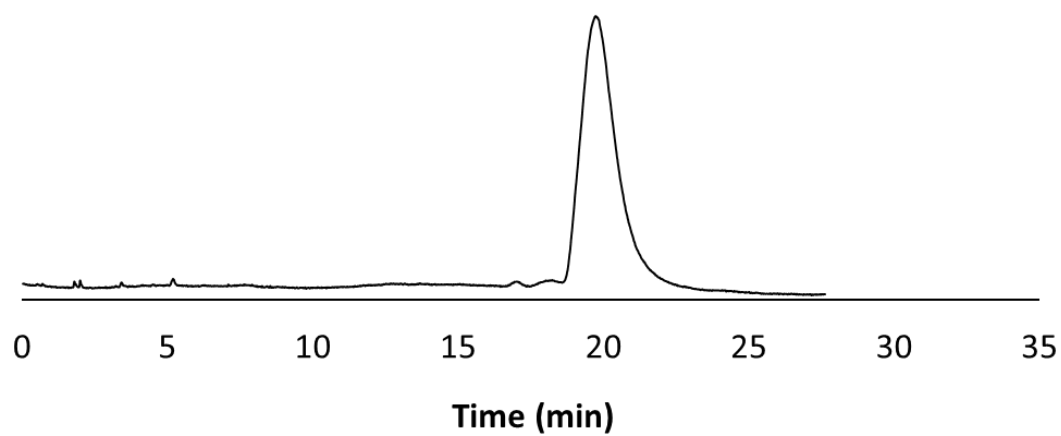

**Figure S127** Quiral HPLC chromatogram at 280 nm of compound (+)-**66a** (r.t. = 19.7 min). Purity > 99%

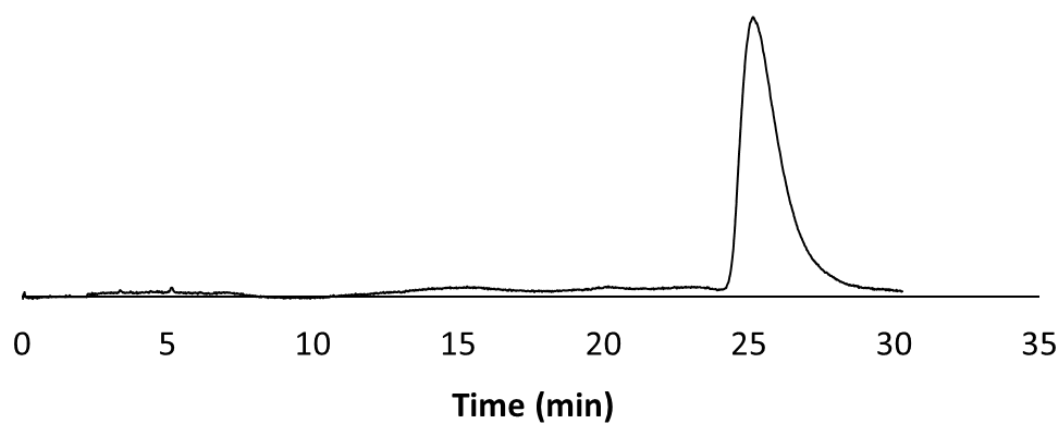

**Figure S128** Quiral HPLC chromatogram at 280 nm of compound (-)-**66a** (r.t. = 25.5 min). Purity > 99%

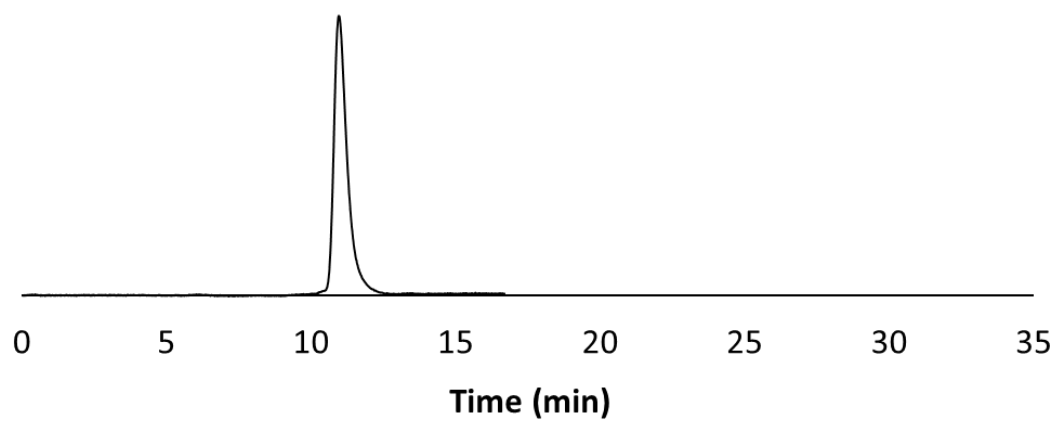

**Figure S129** Quiral HPLC chromatogram at 280 nm of compound (+)-**68a** (r.t. = 10.9 min). Purity > 99%

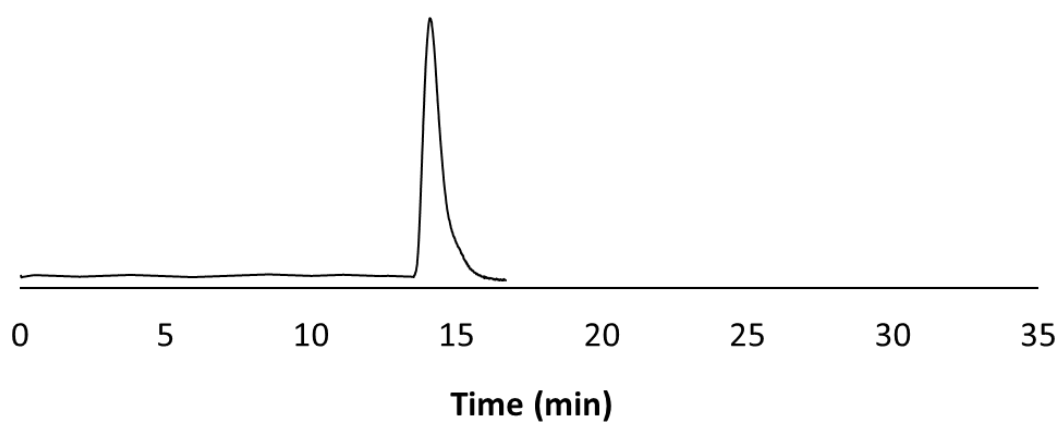

**Figure S130** Quiral HPLC chromatogram at 280 nm of compound (-)-**68a** (r.t. = 14.1 min). Purity > 99%

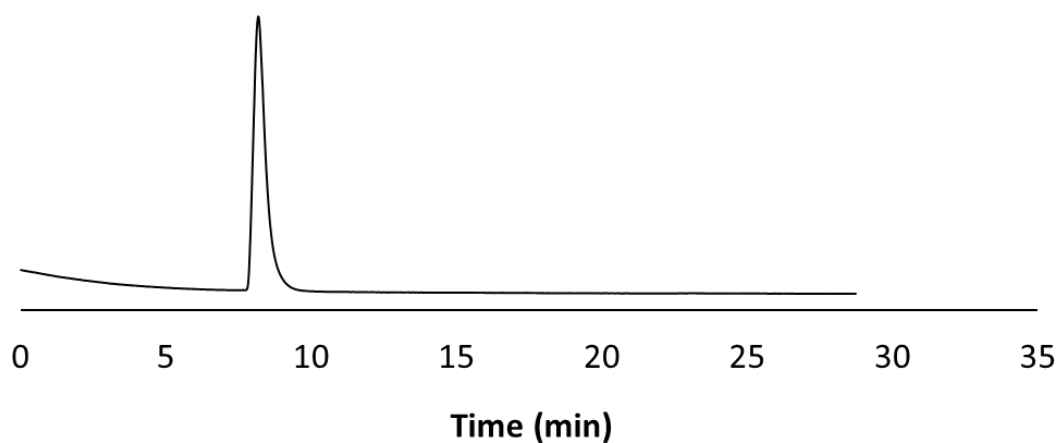

**Figure S131** Quiral HPLC chromatogram at 280 nm of compound (+)-**68b** (r.t. = 8.2 min). Purity > 99%

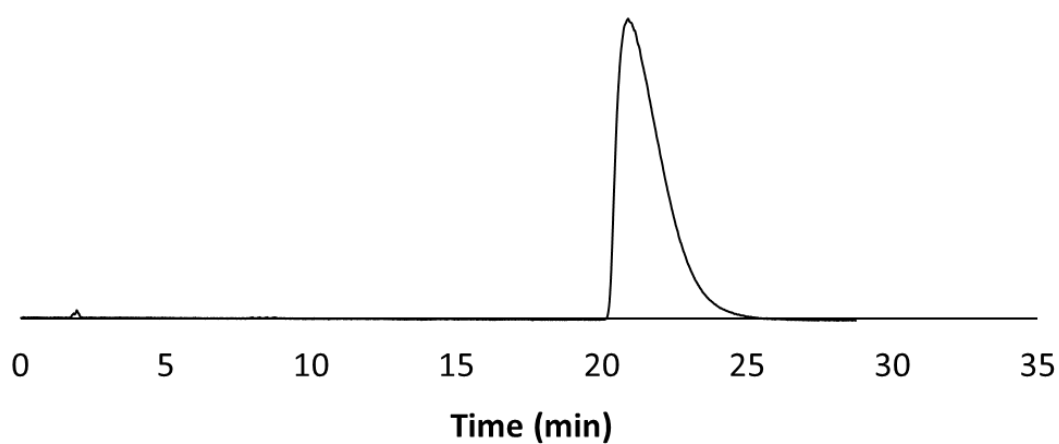

**Figure S132** Quiral HPLC chromatogram at 280 nm of compound (-)-**68b** (r.t. = 20.9 min). Purity > 99%

#### 4. Dose response curves against *h*LDHA and *h*LDHB

### *h*LDHA

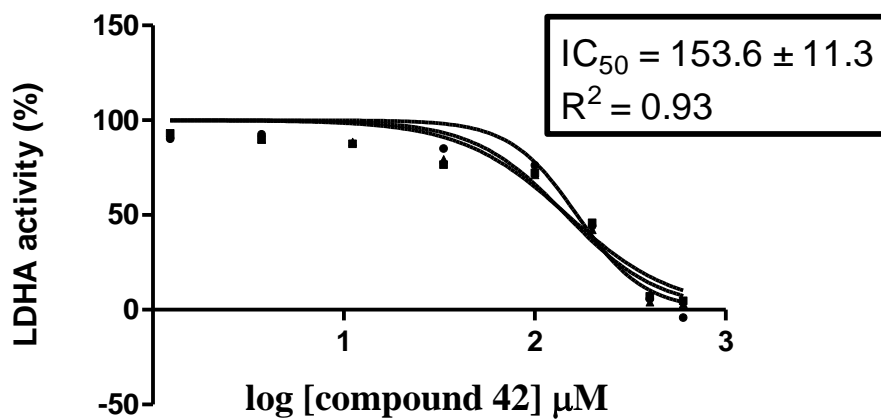

Figure S133. *h*LDHA inhibition curve of compound **42** (mean  $\pm$  SD of  $n = 3$  replicates).

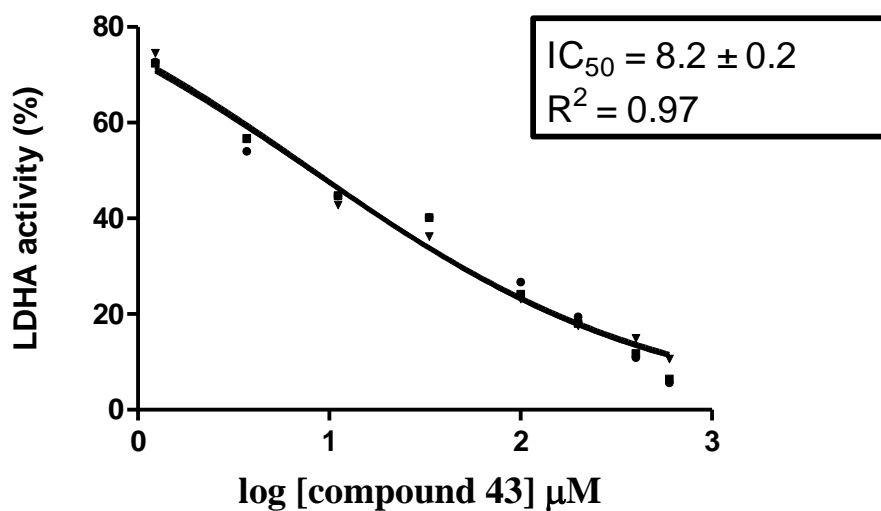

Figure S134. *h*LDHA inhibition curve of compound **43** (mean  $\pm$  SD of  $n = 3$  replicates).



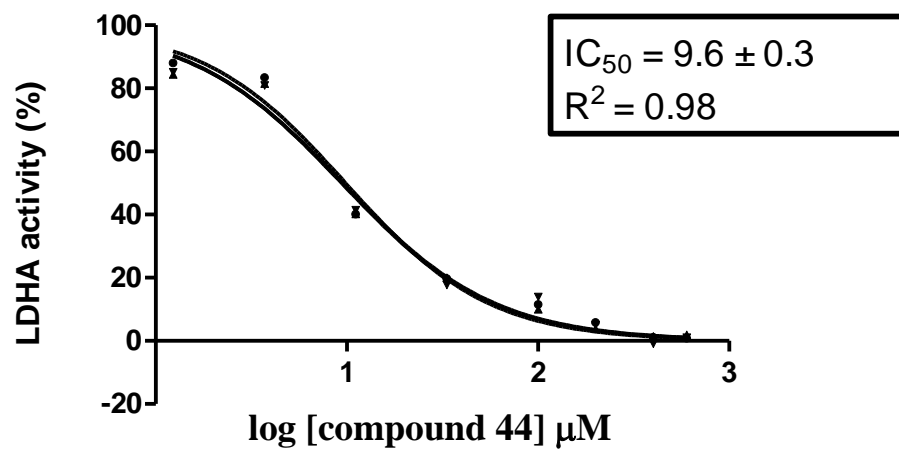

**Figure S135.** *h*LDHA inhibition curve of compound **44** (mean  $\pm$  SD of  $n = 3$  replicates).

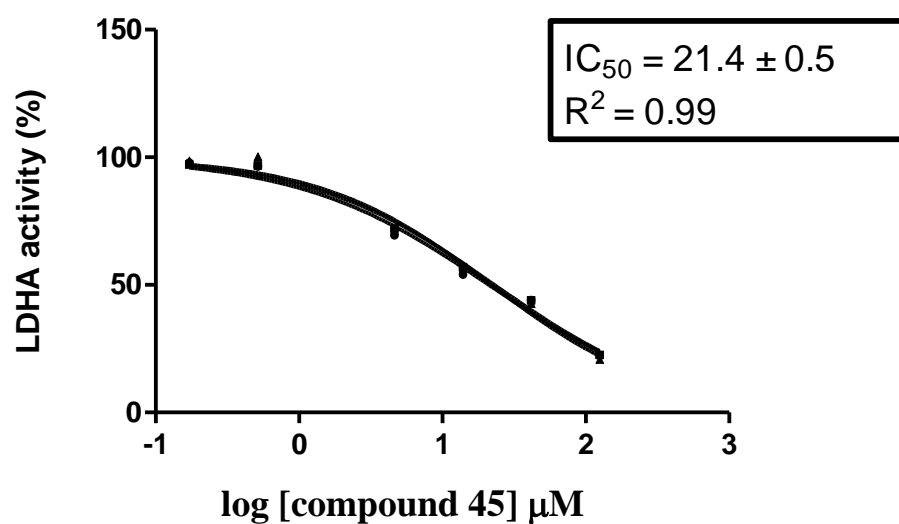

**Figure S136.** *h*LDHA inhibition curve of compound **45** (mean  $\pm$  SD of  $n = 3$  replicates).

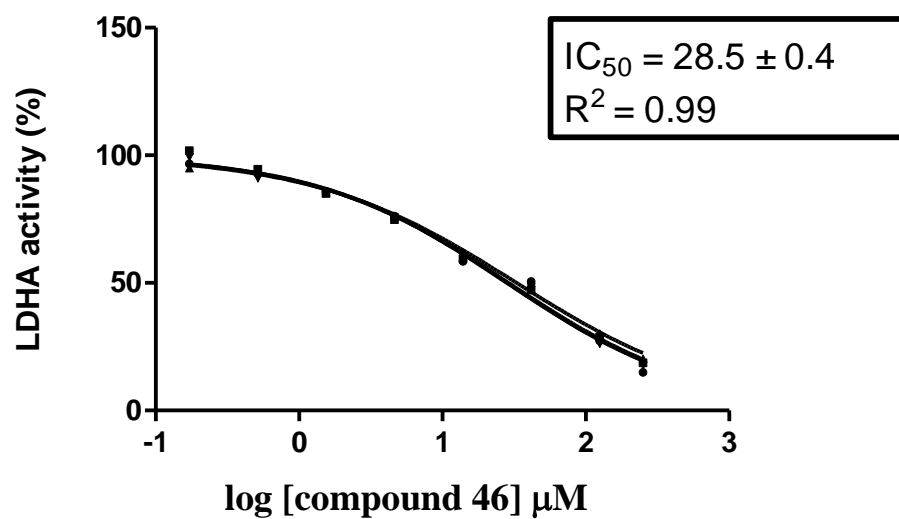

**Figure S137.** *h*LDHA inhibition curve of compound **46** (mean  $\pm$  SD of  $n = 3$  replicates).

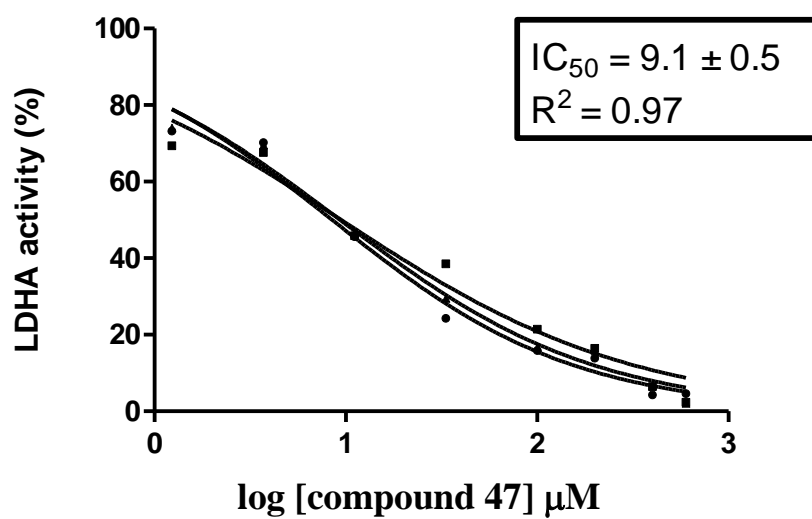

**Figure S138.** *h*LDHA inhibition curve of compound **47** (mean  $\pm$  SD of  $n = 3$  replicates).

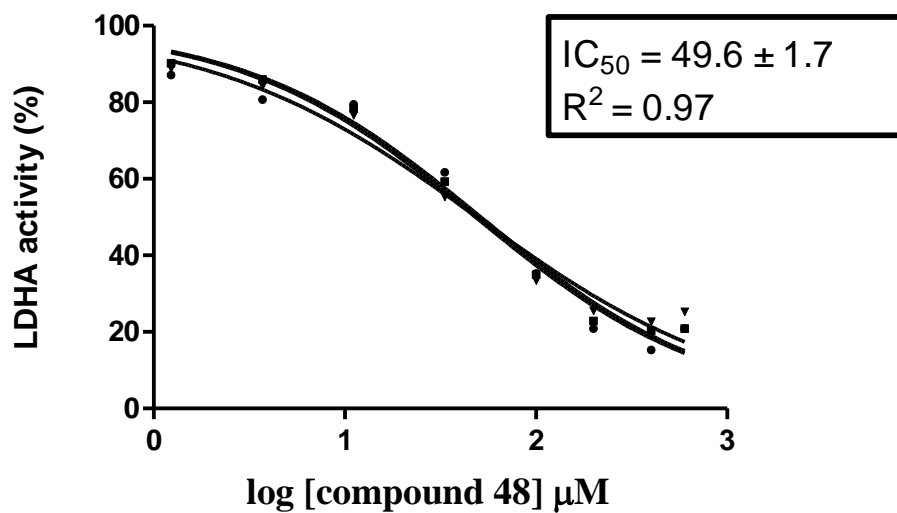

**Figure S139.** *h*LDHA inhibition curve of compound **48** (mean  $\pm$  SD of  $n = 3$  replicates).

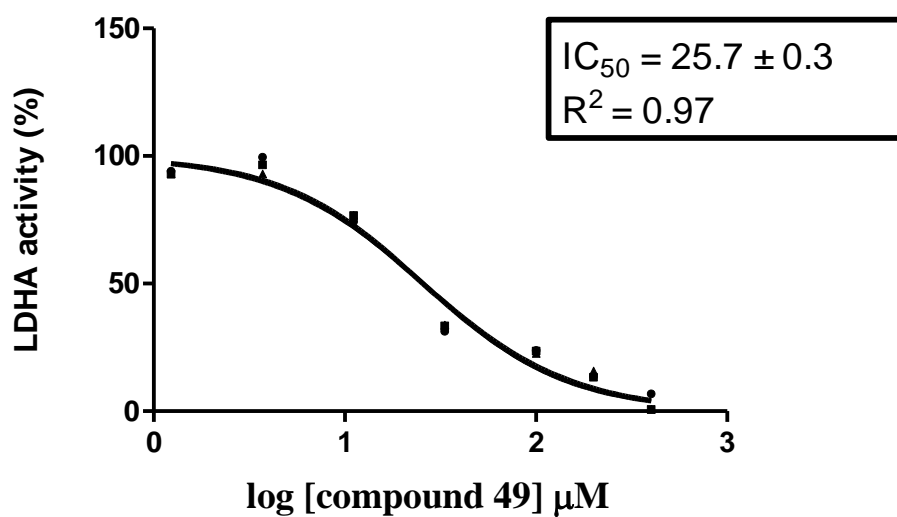

**Figure S140.** *h*LDHA inhibition curve of compound **49** (mean  $\pm$  SD of  $n = 3$  replicates).

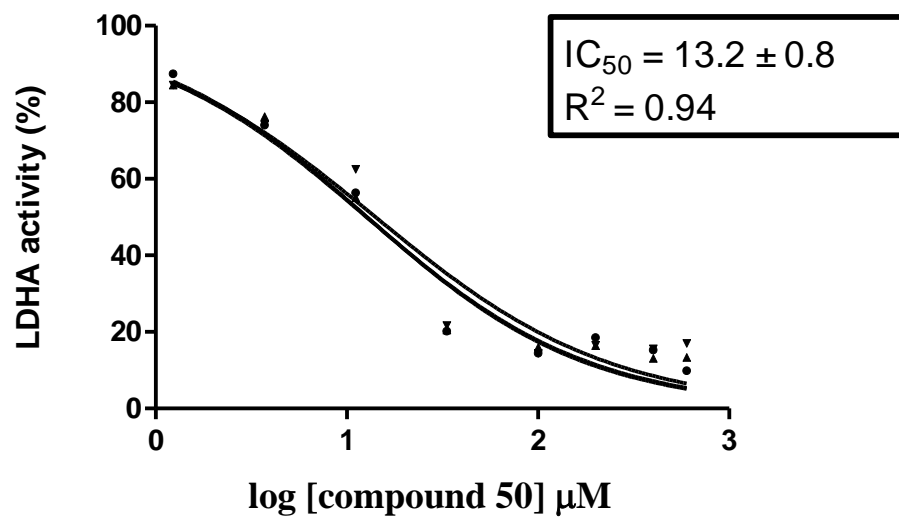

**Figure S141.** *h*LDHA inhibition curve of compound **50** (mean  $\pm$  SD of  $n = 3$  replicates).

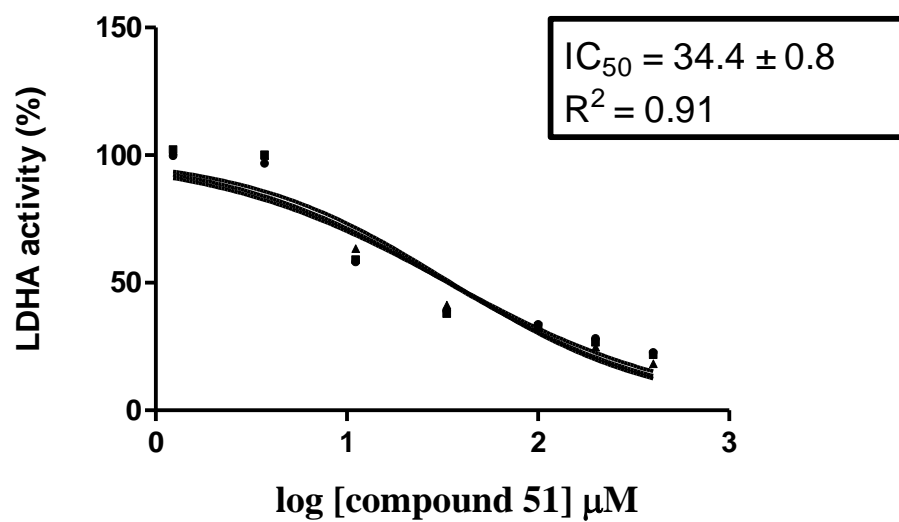

**Figure S142.** *h*LDHA inhibition curve of compound **51** (mean  $\pm$  SD of  $n = 3$  replicates).

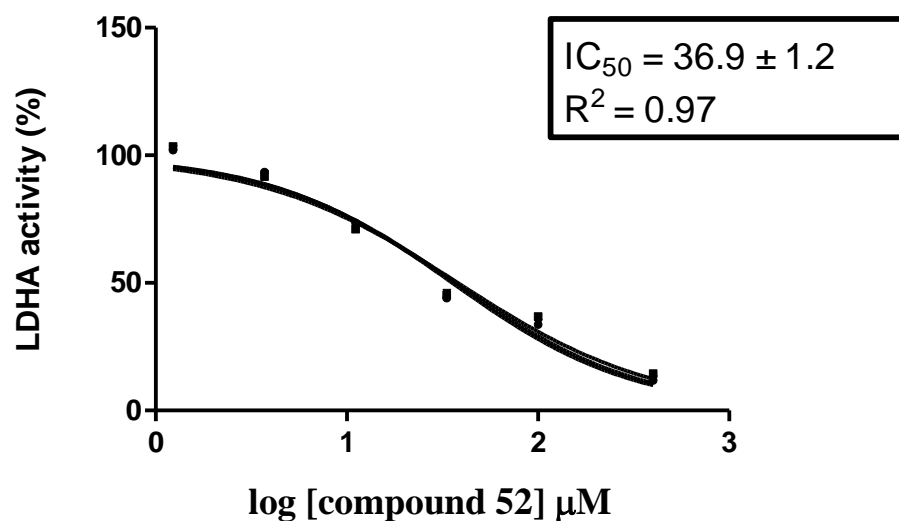

**Figure S143.** *h*LDHA inhibition curve of compound **52** (mean  $\pm$  SD of  $n = 3$  replicates).

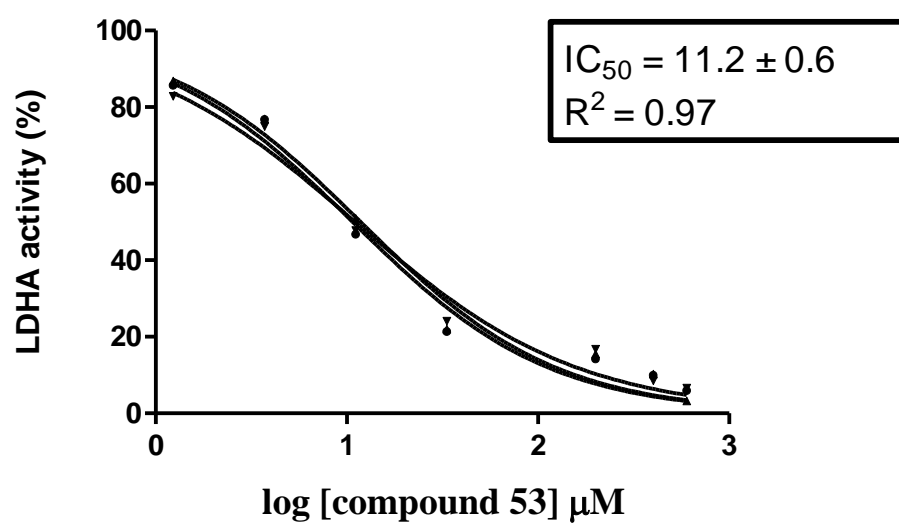

**Figure S144.** *h*LDHA inhibition curve of compound **53** (mean  $\pm$  SD of  $n = 3$  replicates).

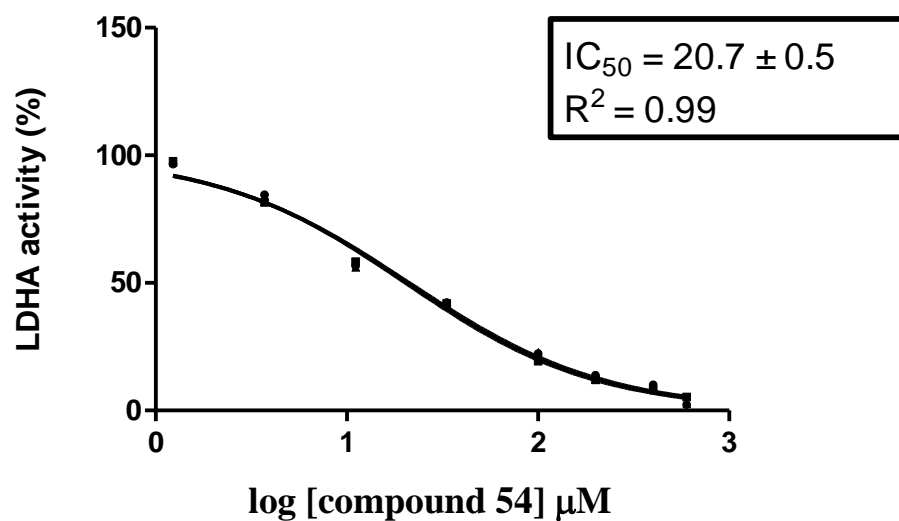

**Figure S145.** *h*LDHA inhibition curve of compound **54** (mean  $\pm$  SD of  $n = 3$  replicates).

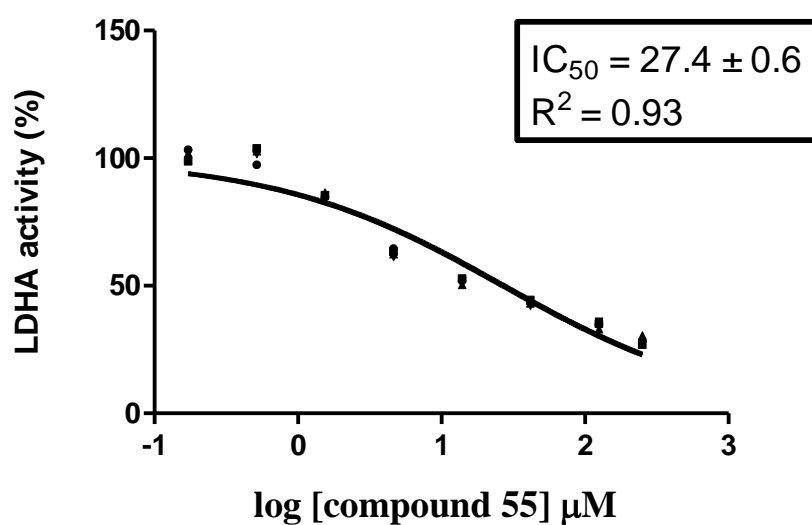

**Figure S146.** *h*LDHA inhibition curve of compound **55** (mean  $\pm$  SD of  $n = 3$  replicates).

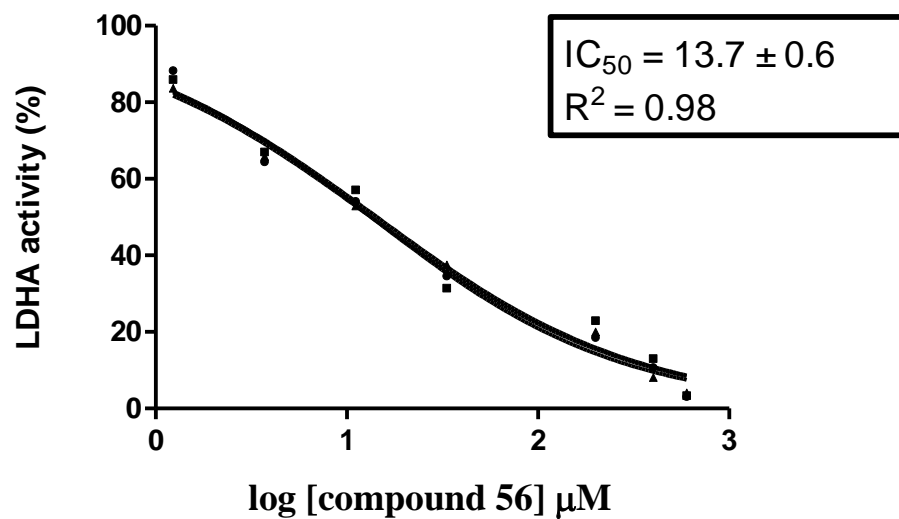

**Figure S147.** *h*LDHA inhibition curve of compound **56** (mean  $\pm$  SD of  $n = 3$  replicates).

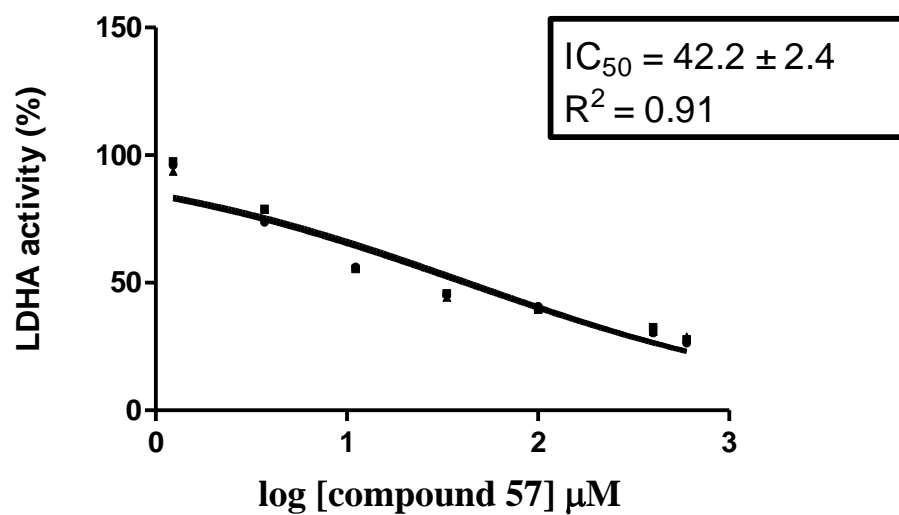

**Figure S148.** *h*LDHA inhibition curve of compound **57** (mean  $\pm$  SD of  $n = 3$  replicates).

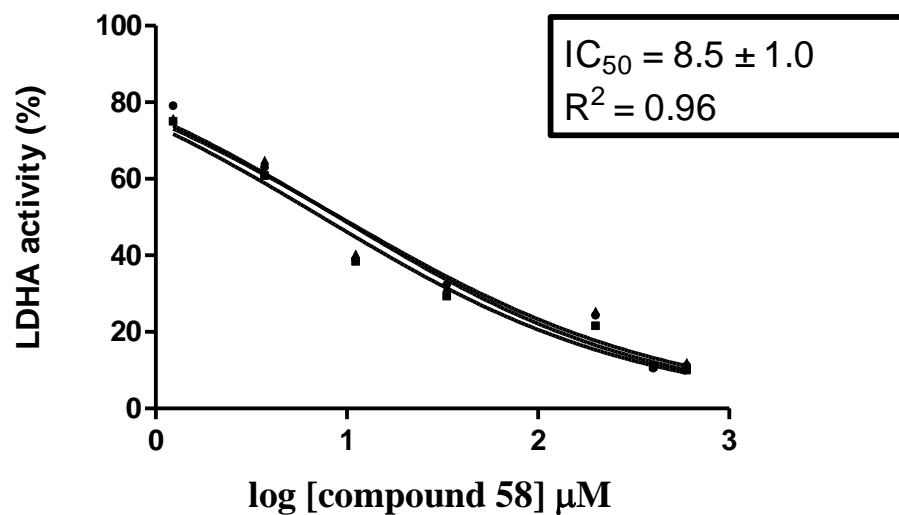

**Figure S149.** *h*LDHA inhibition curve of compound **58** (mean  $\pm$  SD of  $n = 3$  replicates).

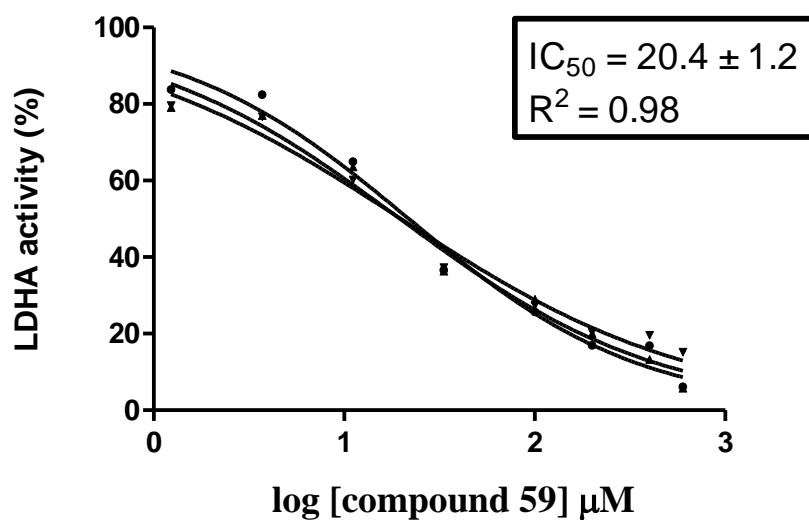

**Figure S150.** *h*LDHA inhibition curve of compound **59** (mean  $\pm$  SD of  $n = 3$  replicates).



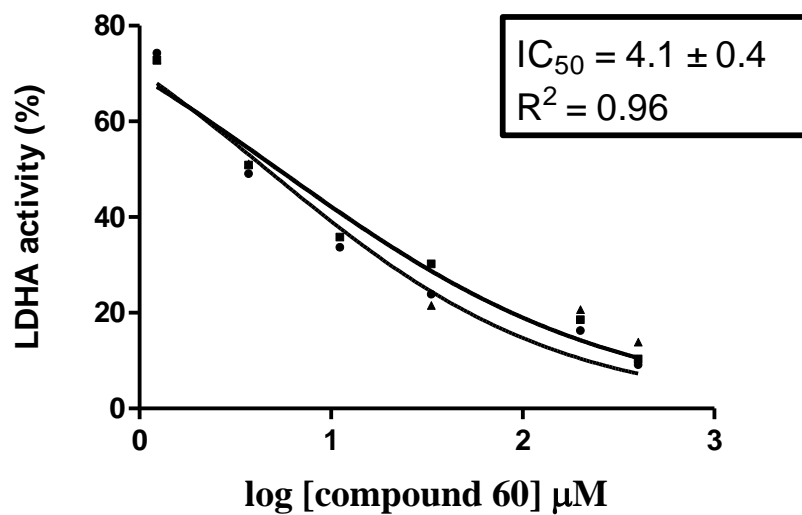

**Figure S151.** *h*LDHA inhibition curve of compound **60** (mean  $\pm$  SD of  $n = 3$  replicates).

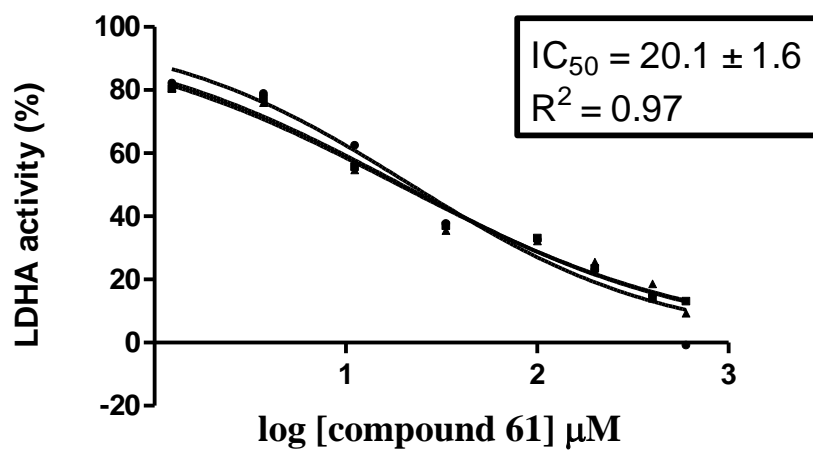

**Figure S152.** *h*LDHA inhibition curve of compound **61** (mean  $\pm$  SD of  $n = 3$  replicates).

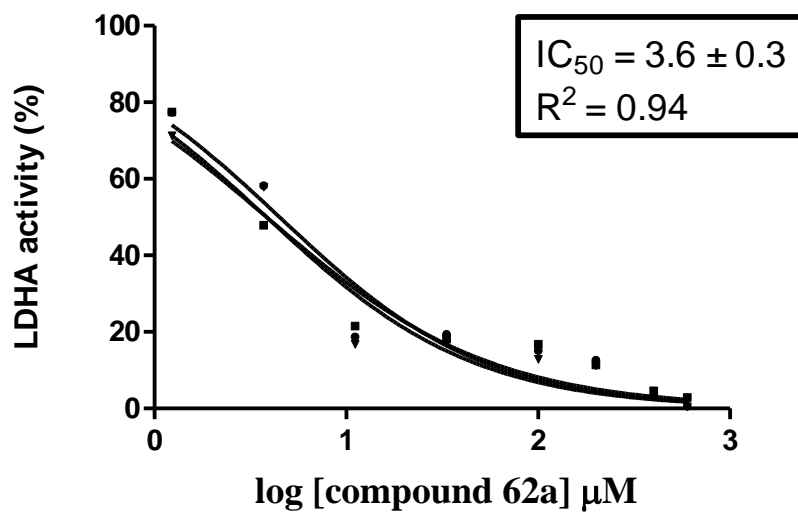

**Figure S153.** *h*LDHA inhibition curve of compound **62a** (mean  $\pm$  SD of  $n = 3$  replicates).

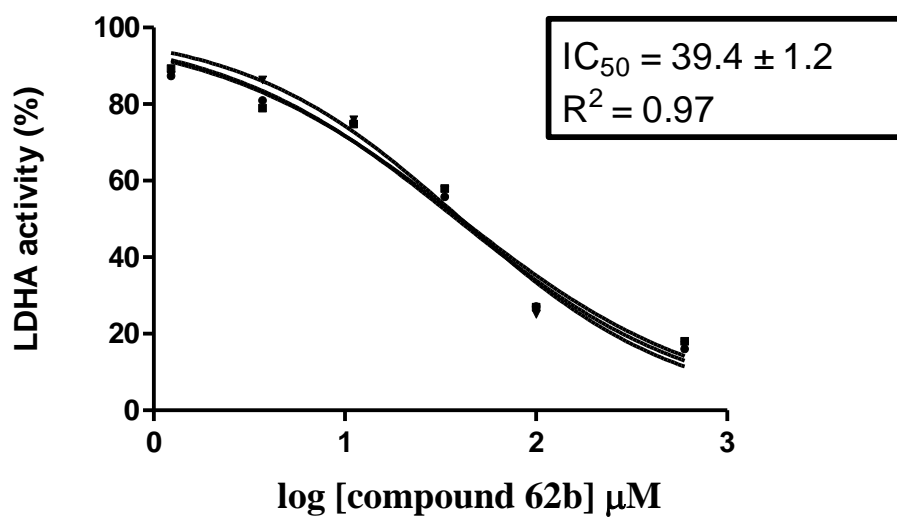

**Figure S154.** *h*LDHA inhibition curve of compound **62b** (mean  $\pm$  SD of  $n = 3$  replicates).

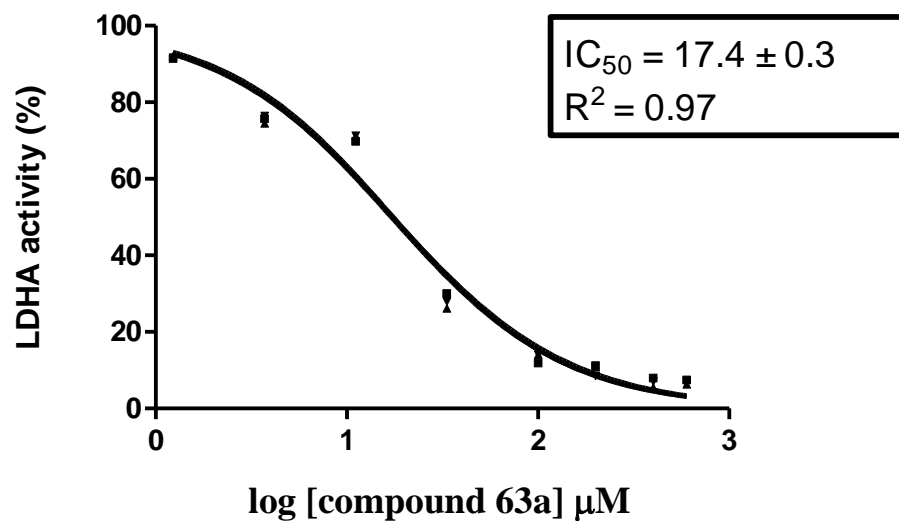

**Figure S155.** *h*LDHA inhibition curve of compound **63a** (mean  $\pm$  SD of  $n = 3$  replicates).

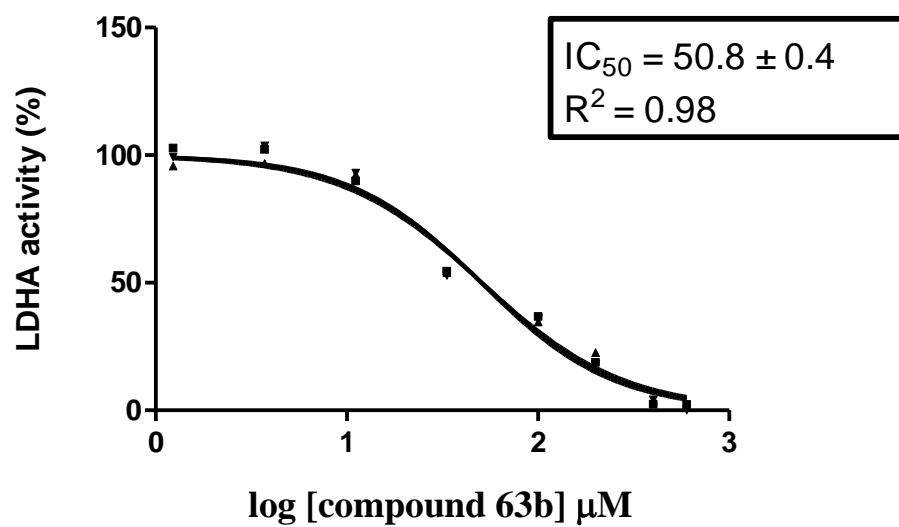

**Figure S156.** *h*LDHA inhibition curve of compound **63b** (mean  $\pm$  SD of  $n = 3$  replicates).

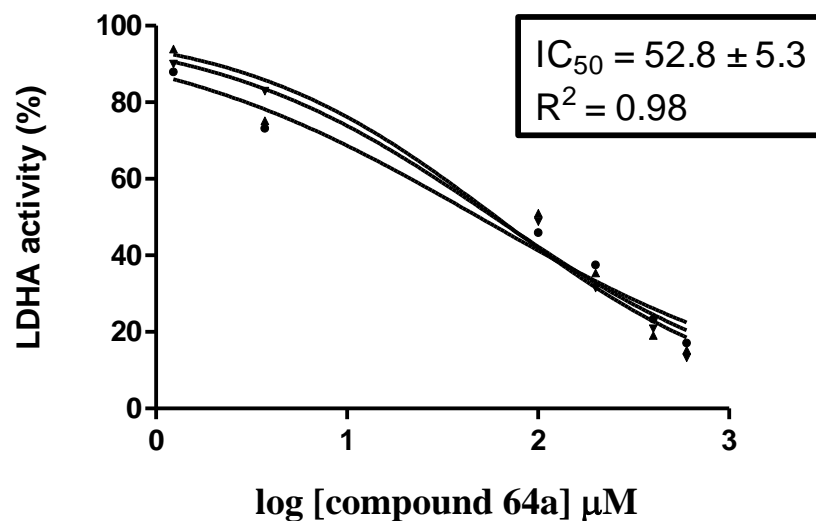

**Figure S157.** *h*LDHA inhibition curve of compound **64a** (mean  $\pm$  SD of  $n = 3$  replicates).

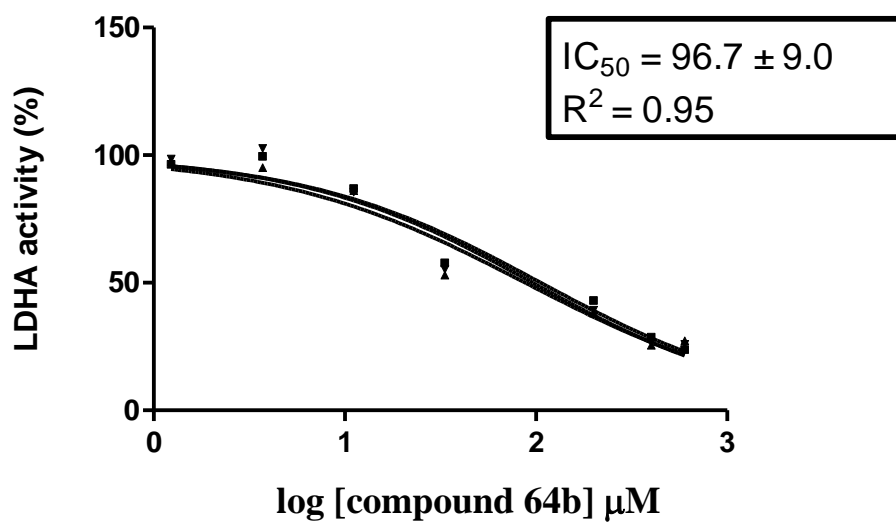

**Figure S158.** *h*LDHA inhibition curve of compound **64b** (mean  $\pm$  SD of  $n = 3$  replicates).

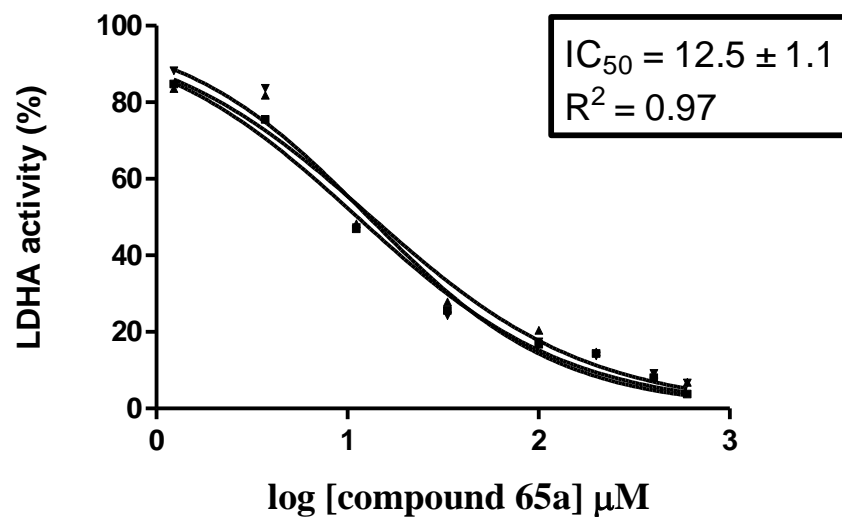

**Figure S159.** *h*LDHA inhibition curve of compound **65a** (mean  $\pm$  SD of  $n = 3$  replicates).

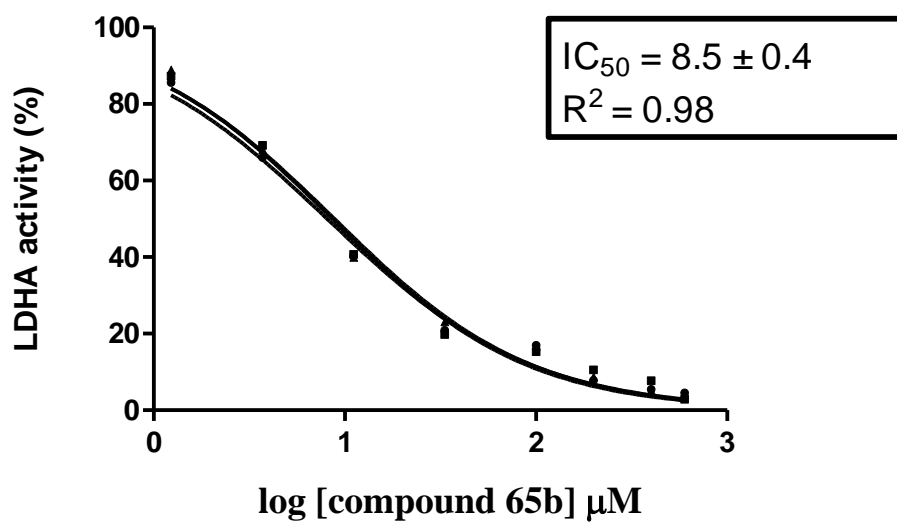

**Figure S160.** *h*LDHA inhibition curve of compound **65b** (mean  $\pm$  SD of  $n = 3$  replicates).

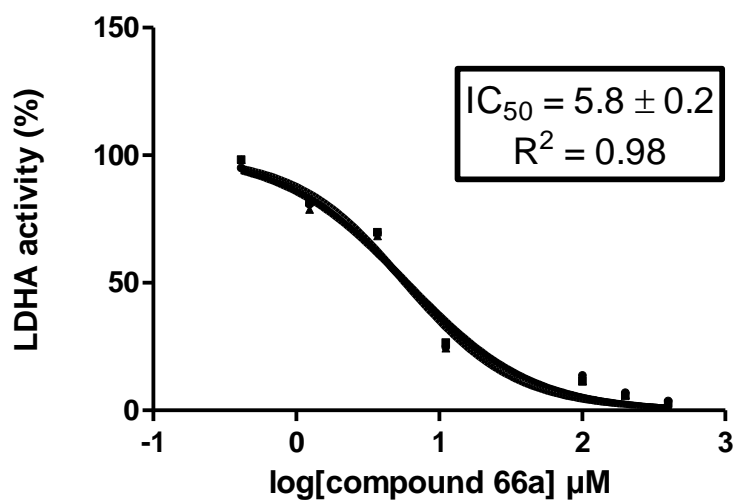

**Figure S161.** *h*LDHA inhibition curve of compound **66a** (mean  $\pm$  SD of  $n = 3$  replicates).

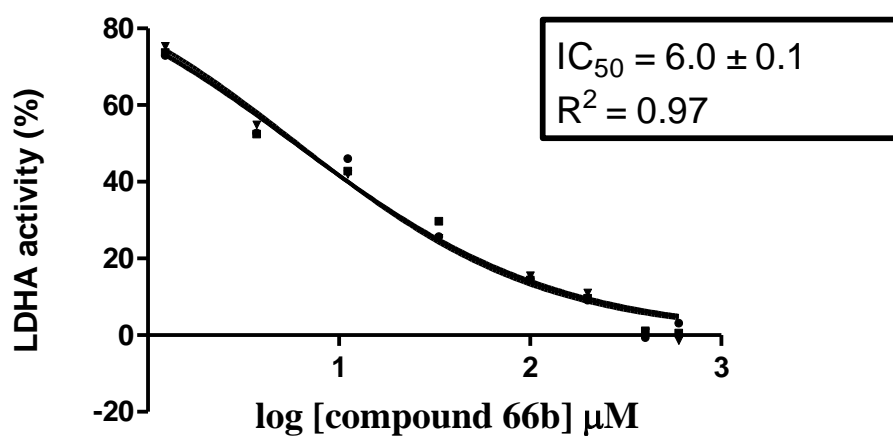

**Figure S162.** *h*LDHA inhibition curve of compound **66b** (mean  $\pm$  SD of  $n = 3$  replicates).

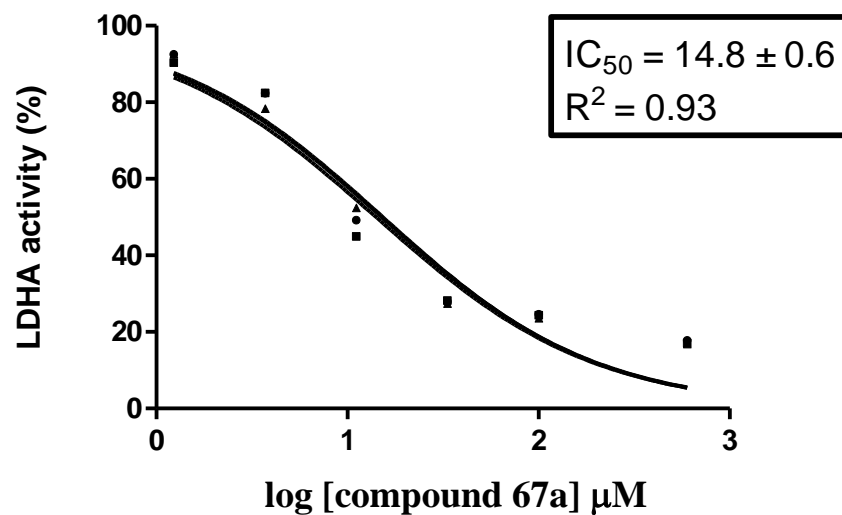

**Figure S163.** *h*LDHA inhibition curve of compound **67a** (mean  $\pm$  SD of  $n = 3$  replicates).

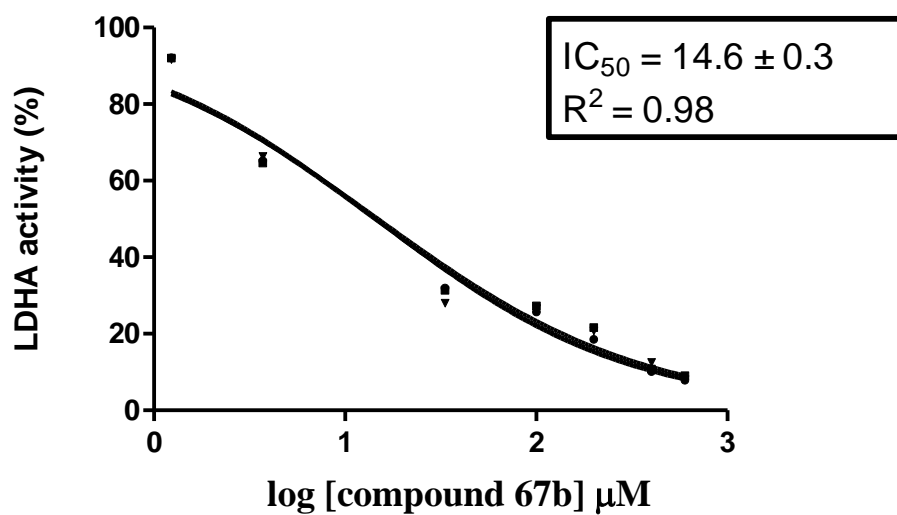

**Figure S164.** *h*LDHA inhibition curve of compound **67b** (mean  $\pm$  SD of  $n = 3$  replicates).

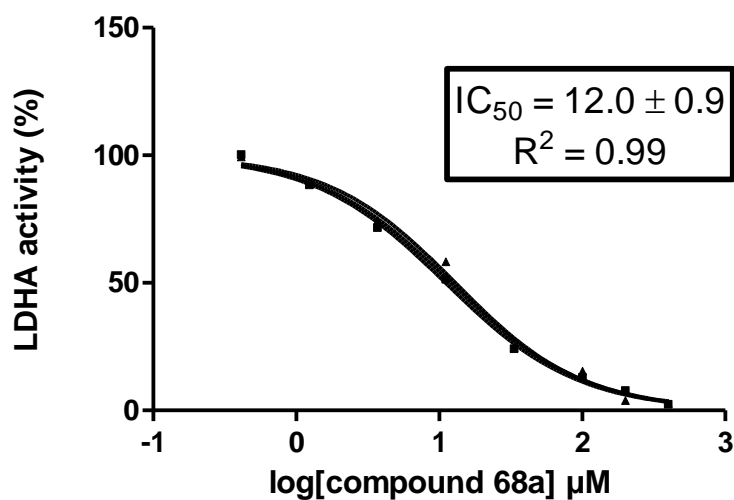

**Figure S165.** *h*LDHA inhibition curve of compound **68a** (mean  $\pm$  SD of  $n = 3$  replicates).

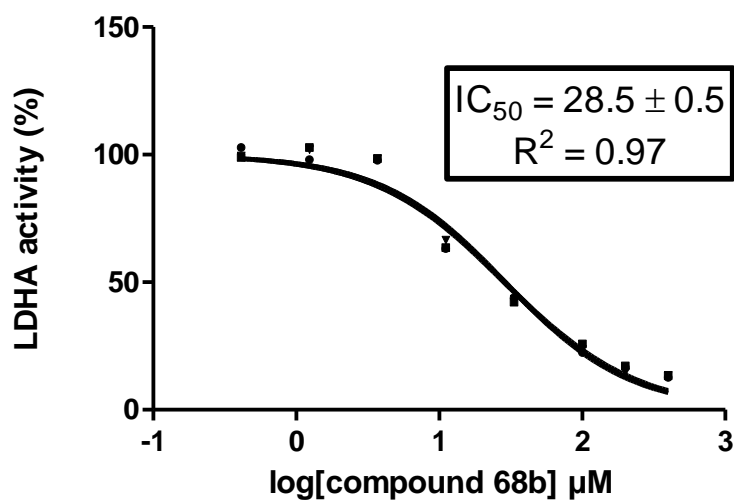

**Figure S166.** *h*LDHA inhibition curve of compound **68b** (mean  $\pm$  SD of  $n = 3$  replicates).



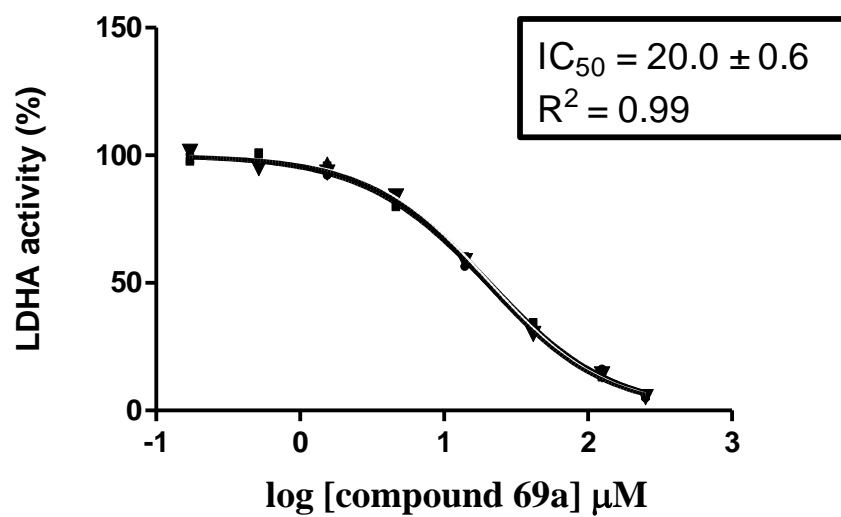

**Figure S167.** *h*LDHA inhibition curve of compound **69a** (mean  $\pm$  SD of  $n = 3$  replicates).

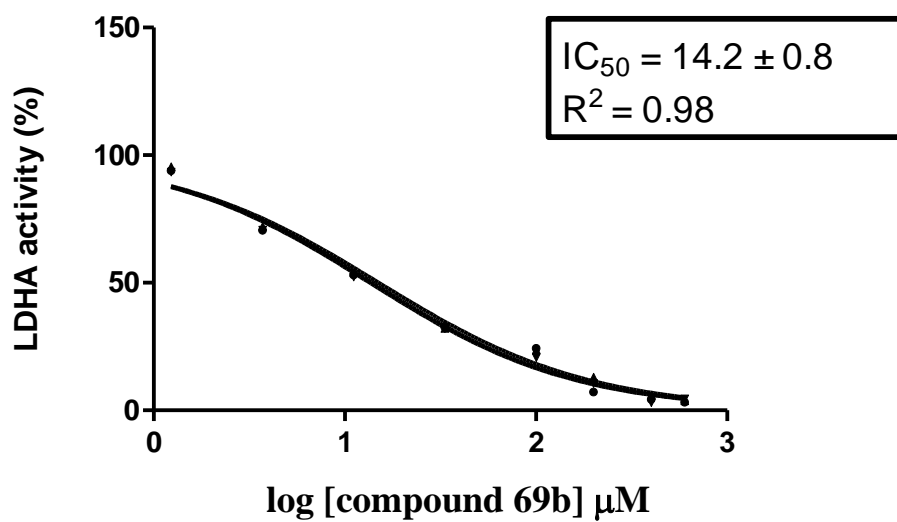

**Figure S168.** *h*LDHA inhibition curve of compound **69b** (mean  $\pm$  SD of  $n = 3$  replicates).

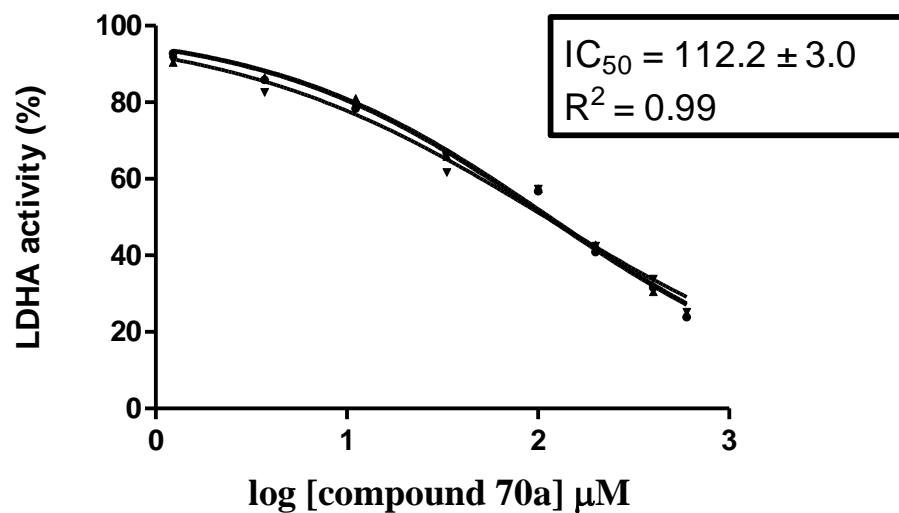

**Figure S169.** *h*LDHA inhibition curve of compound **70a** (mean  $\pm$  SD of  $n = 3$  replicates).

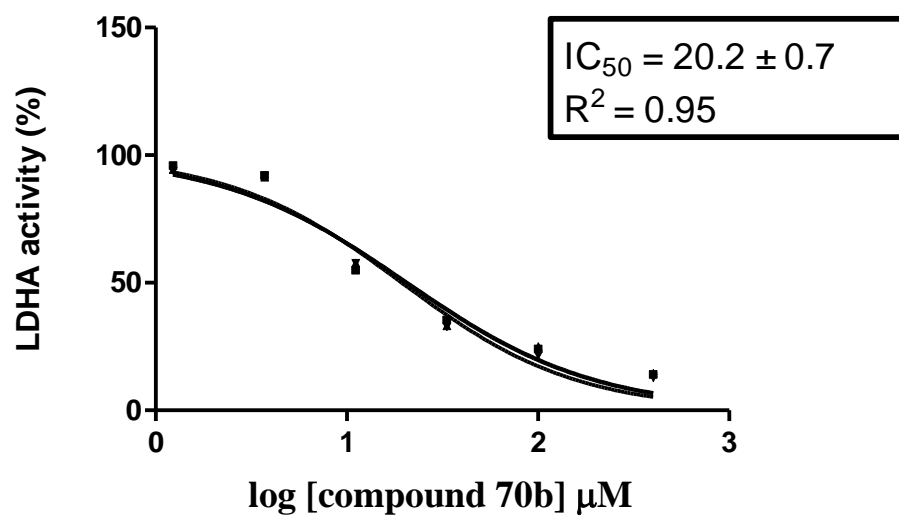

**Figure S170.** *h*LDHA inhibition curve of compound **70b** (mean  $\pm$  SD of  $n = 3$  replicates).

## *h*LDHB

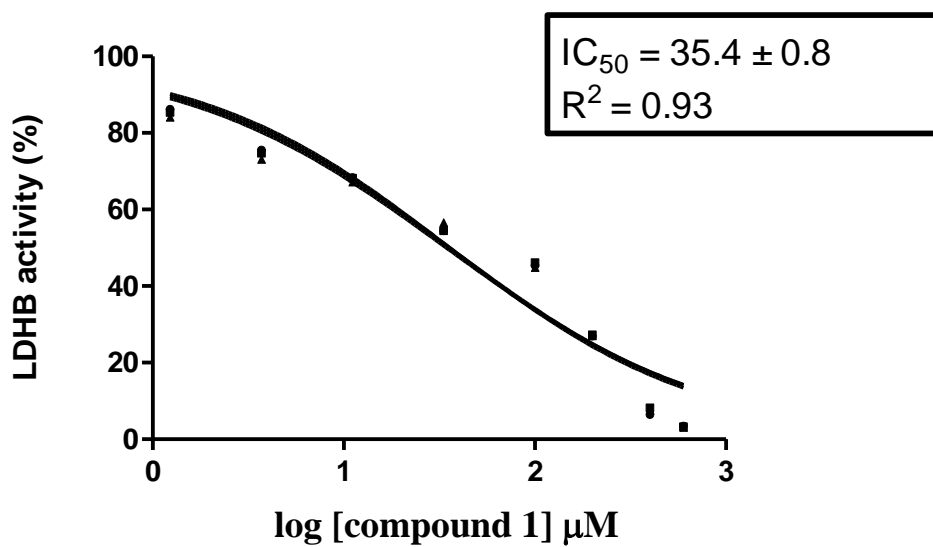

**Figure S171.** *h*LDHB inhibition curve of compound **1** (mean  $\pm$  SD of  $n = 3$  replicates).

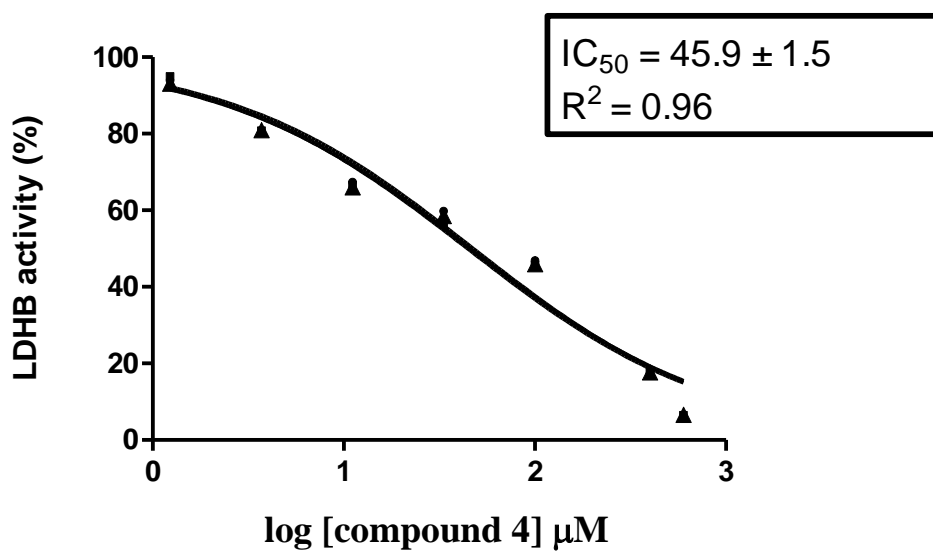

**Figure S172.** *h*LDHB inhibition curve of compound **4** (mean  $\pm$  SD of  $n = 3$  replicates).

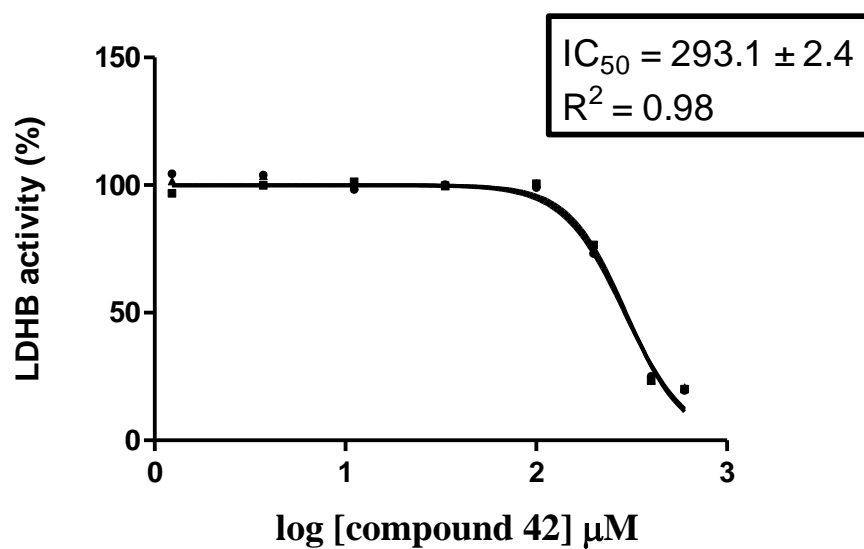

**Figure S173.** *h*LDHB inhibition curve of compound **42** (mean  $\pm$  SD of  $n = 3$  replicates).

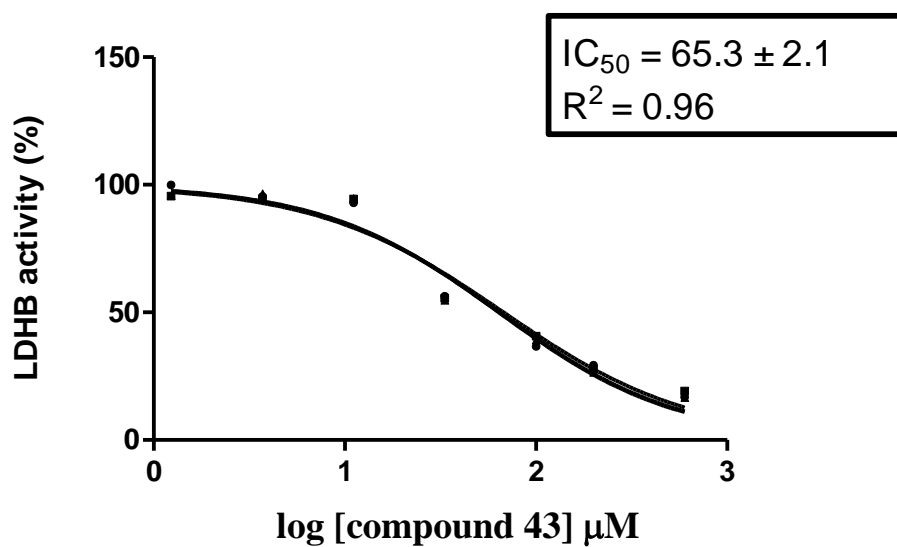

**Figure S174.** *h*LDHB inhibition curve of compound **43** (mean  $\pm$  SD of  $n = 3$  replicates).

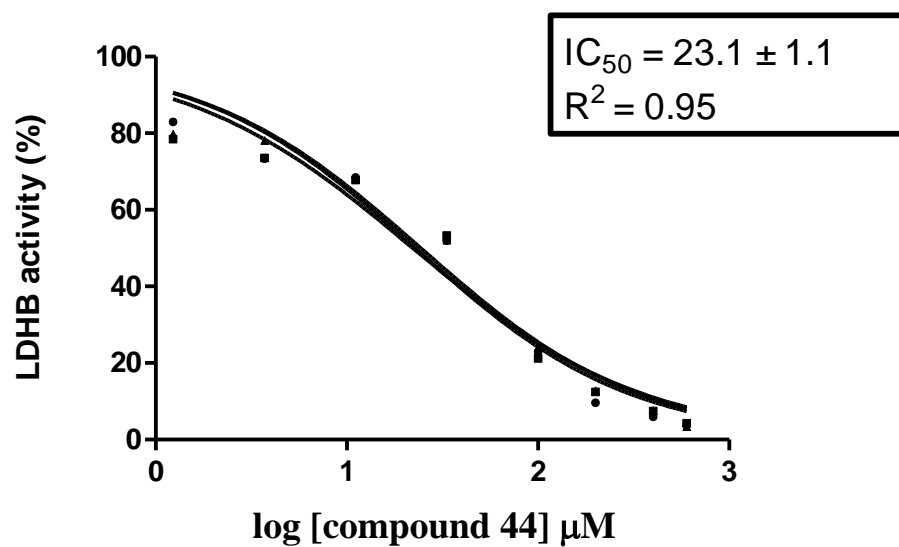

**Figure S175.** *h*LDHB inhibition curve of compound **44** (mean  $\pm$  SD of  $n = 3$  replicates).

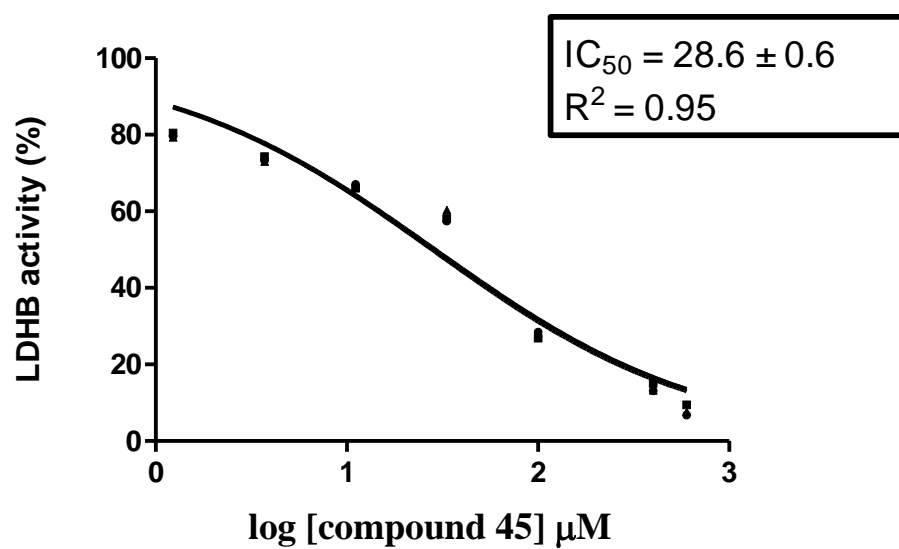

**Figure S176.** *h*LDHB inhibition curve of compound **45** (mean  $\pm$  SD of  $n = 3$  replicates).

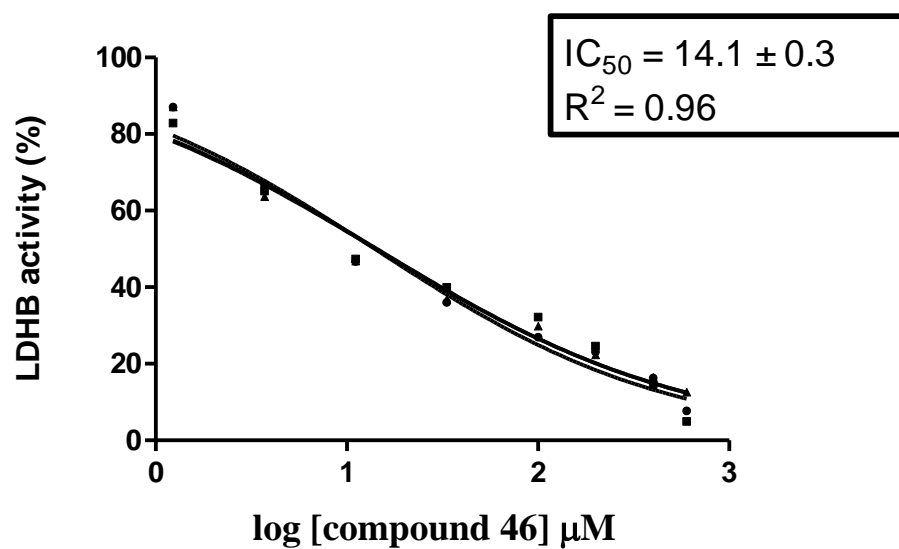

**Figure S177.** *h*LDHB inhibition curve of compound **46** (mean  $\pm$  SD of  $n = 3$  replicates).

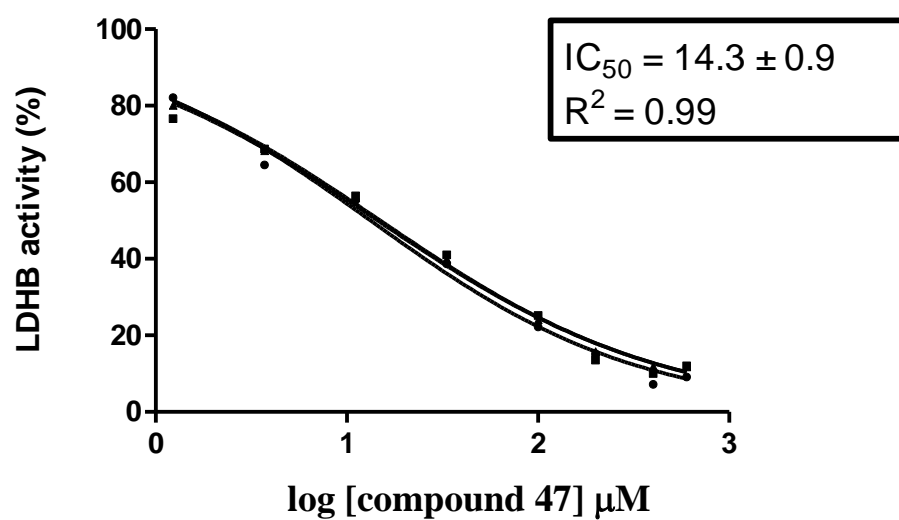

**Figure S178.** *h*LDHB inhibition curve of compound **47** (mean  $\pm$  SD of  $n = 3$  replicates).

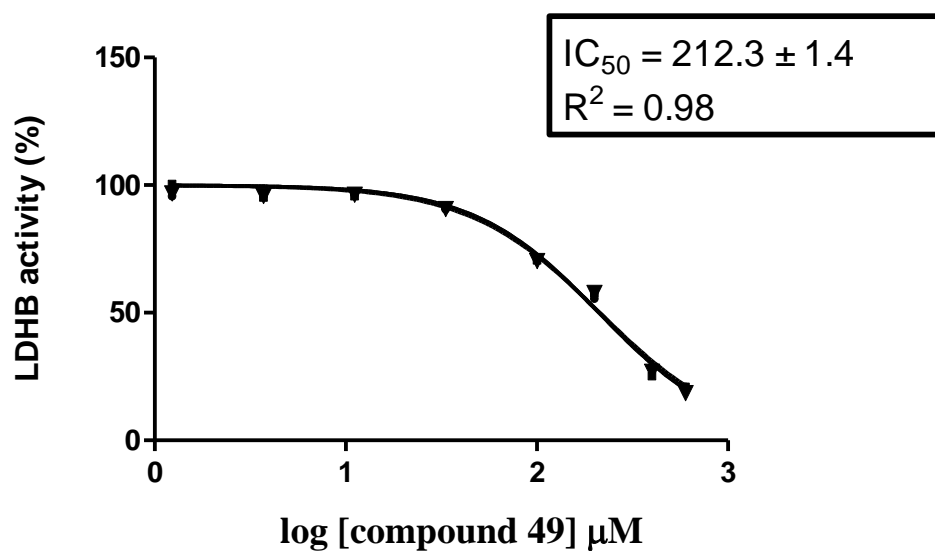

**Figure S179.** *h*LDHB inhibition curve of compound **49** (mean  $\pm$  SD of  $n = 3$  replicates).

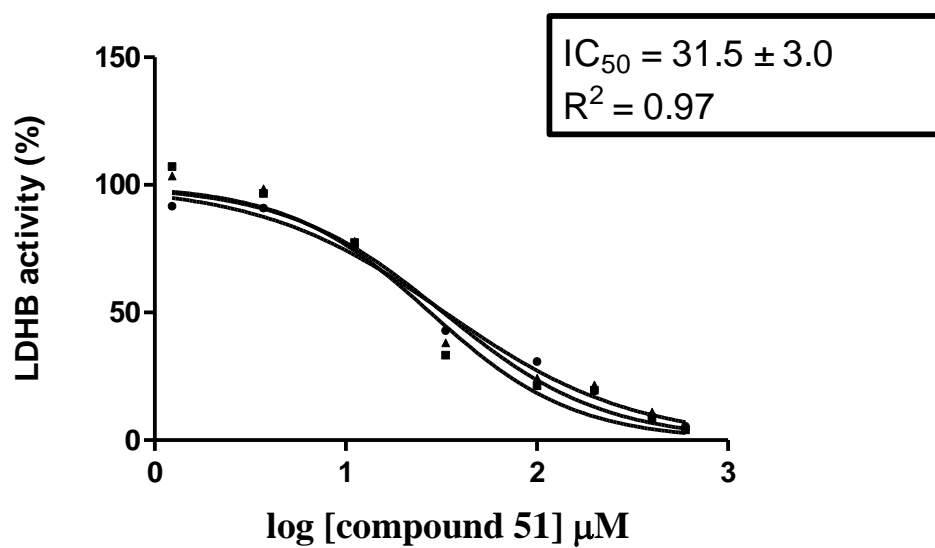

**Figure S180.** *h*LDHB inhibition curve of compound **51** (mean  $\pm$  SD of  $n = 3$  replicates).

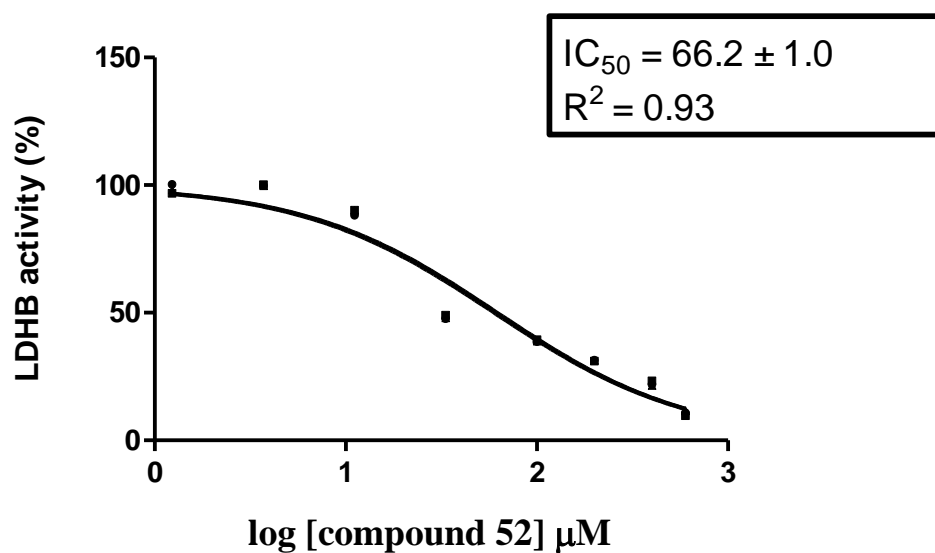

**Figure S181.** *h*LDHB inhibition curve of compound **52** (mean  $\pm$  SD of  $n = 3$  replicates).

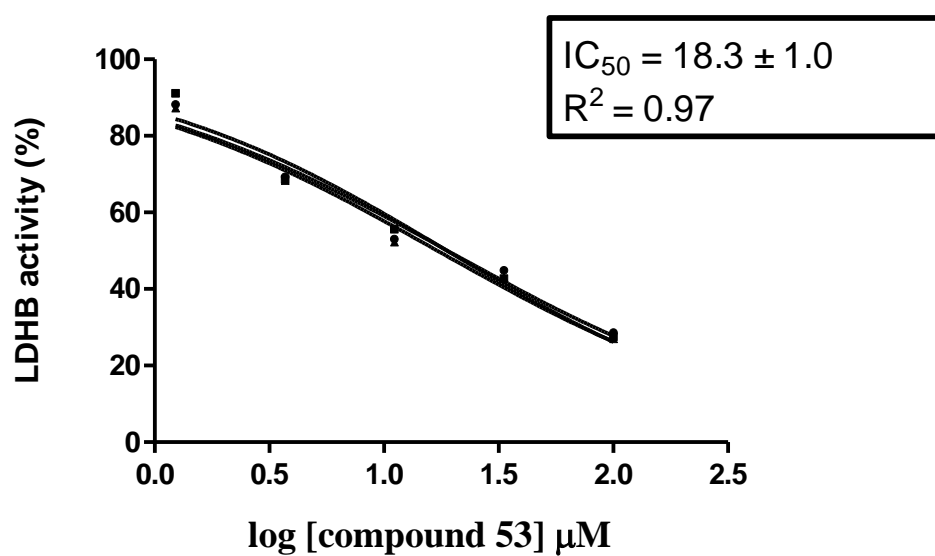

**Figure S182.** *h*LDHB inhibition curve of compound **53** (mean  $\pm$  SD of  $n = 3$  replicates).



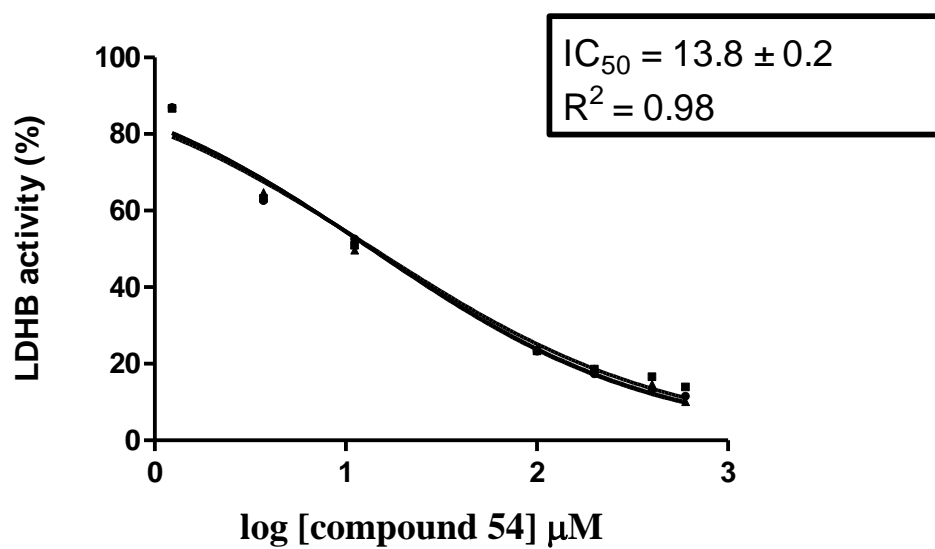

**Figure S183.** *h*LDHB inhibition curve of compound **54** (mean  $\pm$  SD of  $n = 3$  replicates).

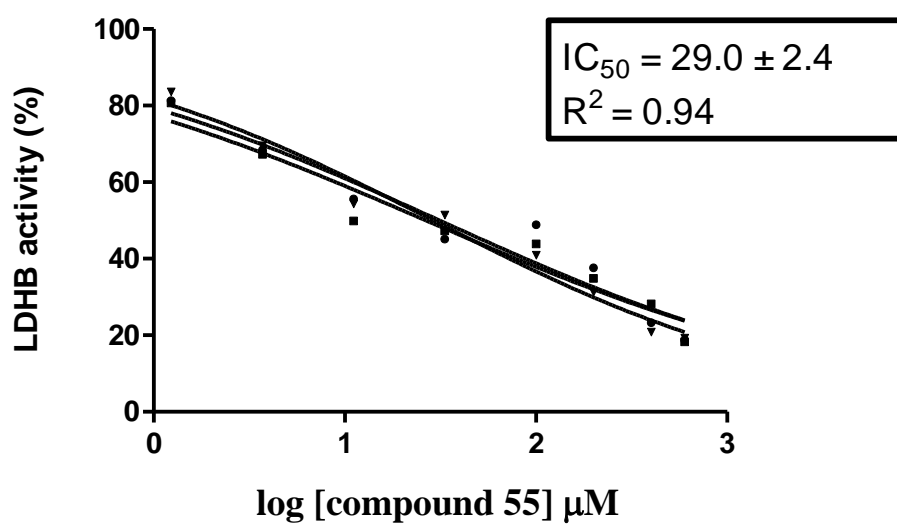

**Figure S184.** *h*LDHB inhibition curve of compound **55** (mean  $\pm$  SD of  $n = 3$  replicates).

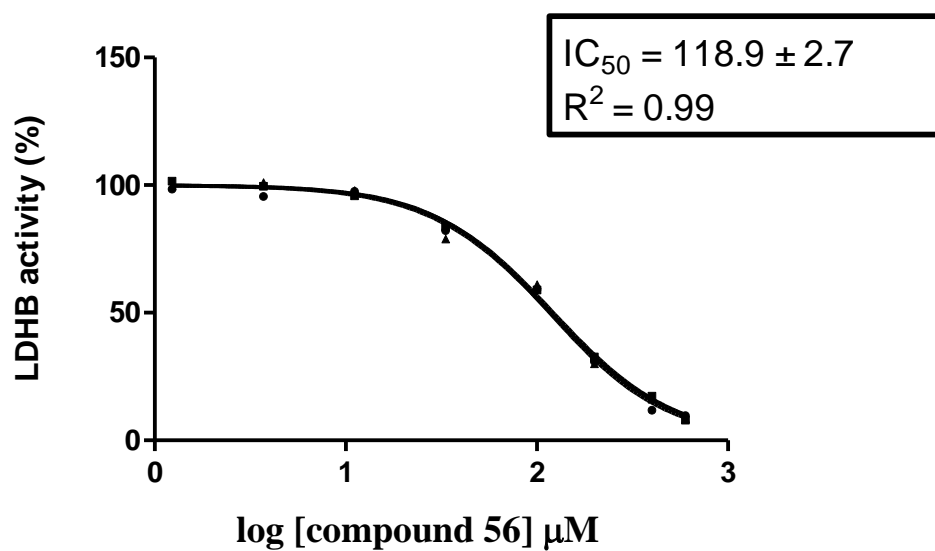

**Figure S185.** *h*LDHB inhibition curve of compound **56** (mean  $\pm$  SD of  $n = 3$  replicates).

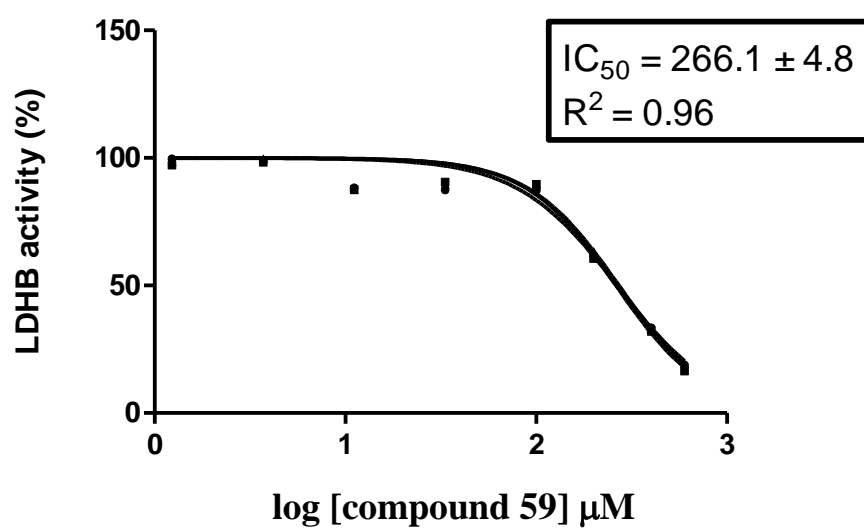

**Figure S186.** *h*LDHB inhibition curve of compound **59** (mean  $\pm$  SD of  $n = 3$  replicates).

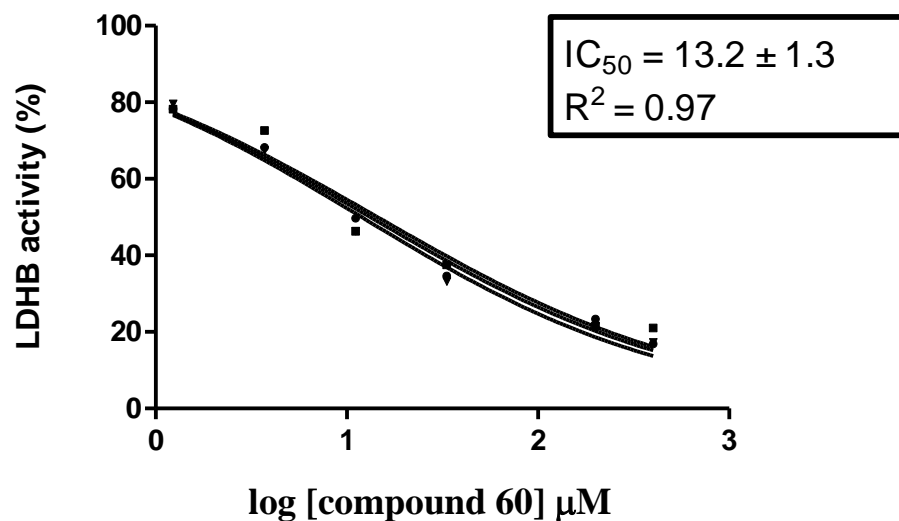

**Figure S187.** *h*LDHB inhibition curve of compound **60** (mean  $\pm$  SD of  $n = 3$  replicates).

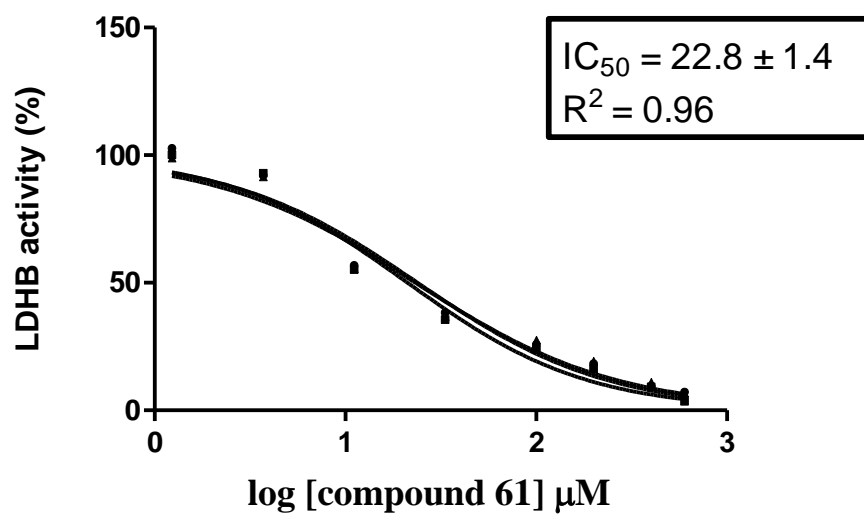

**Figure S188.** *h*LDHB inhibition curve of compound **61** (mean  $\pm$  SD of  $n = 3$  replicates).

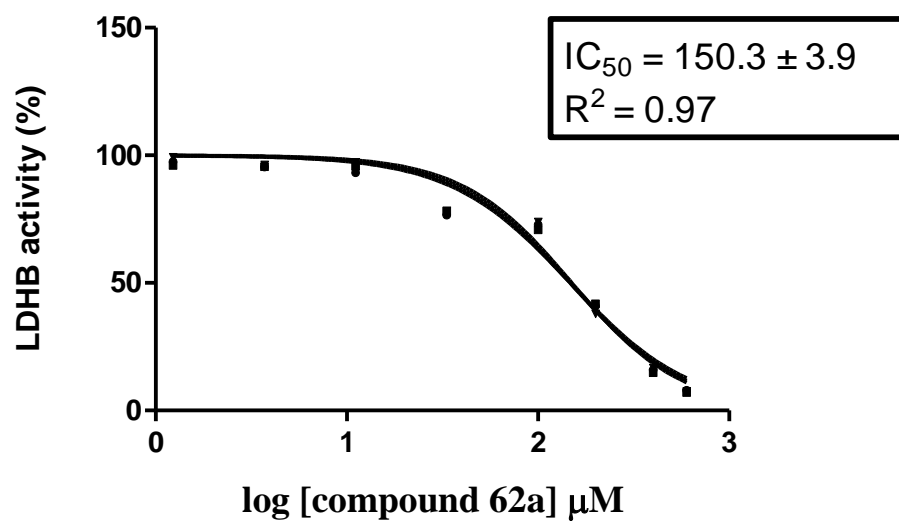

**Figure S189.** *h*LDHB inhibition curve of compound **62a** (mean  $\pm$  SD of  $n = 3$  replicates).

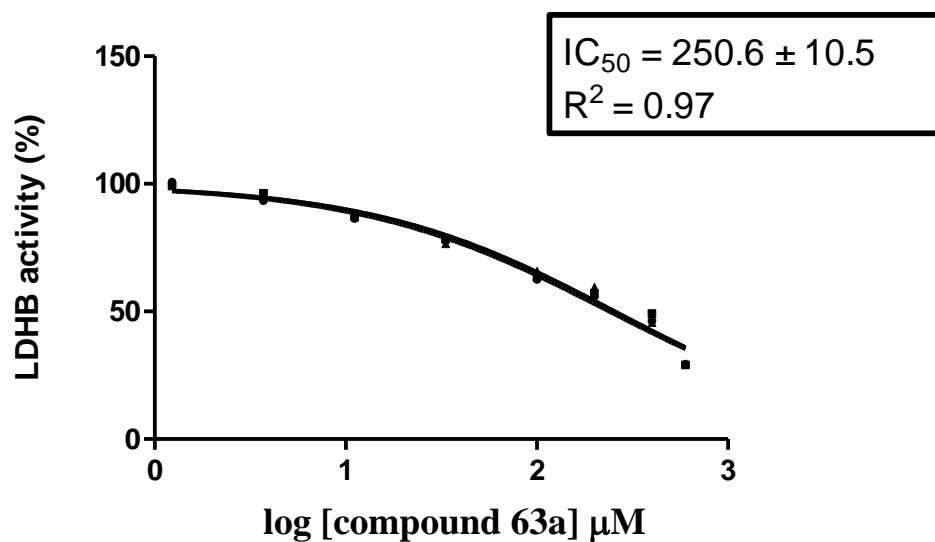

**Figure S190.** *h*LDHB inhibition curve of compound **63a** (mean  $\pm$  SD of  $n = 3$  replicates).

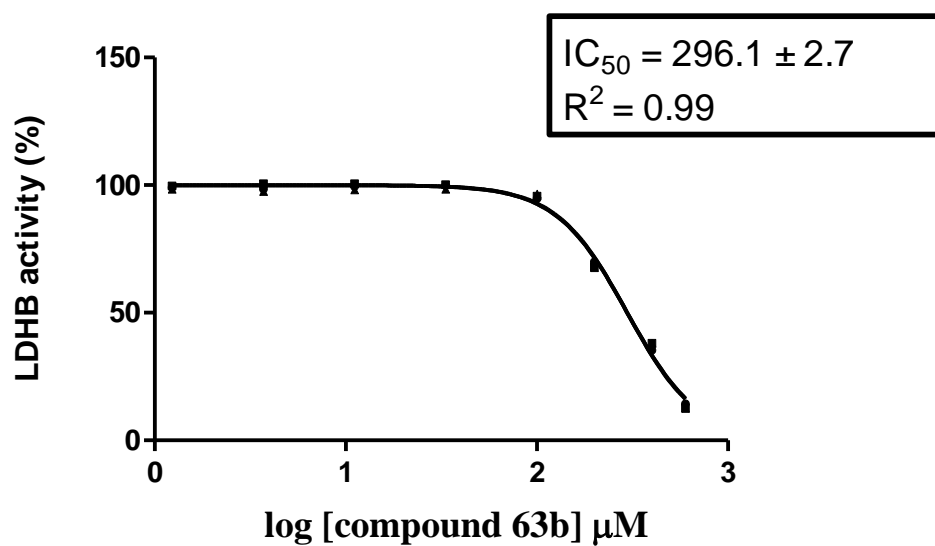

**Figure S191.** *h*LDHB inhibition curve of compound **63b** (mean  $\pm$  SD of  $n = 3$  replicates).

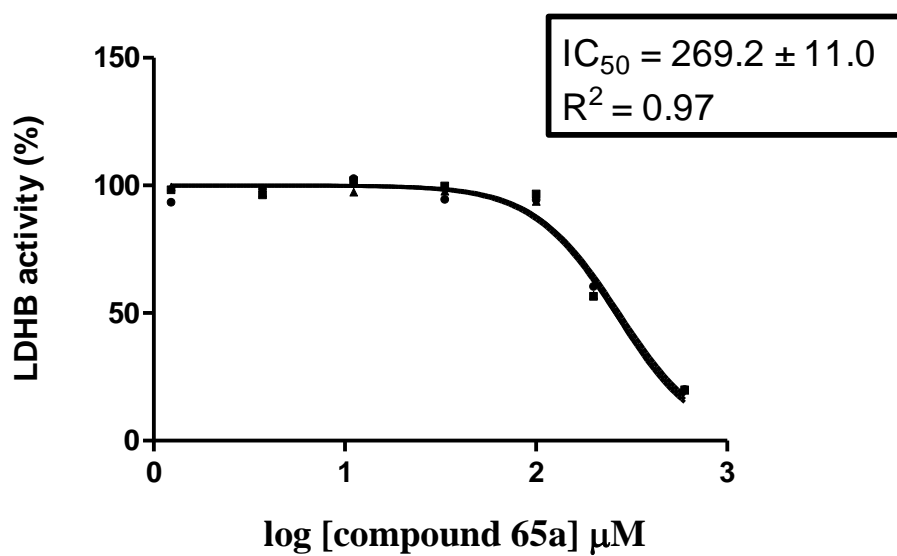

**Figure S192.** *h*LDHB inhibition curve of compound **65a** (mean  $\pm$  SD of  $n = 3$  replicates).

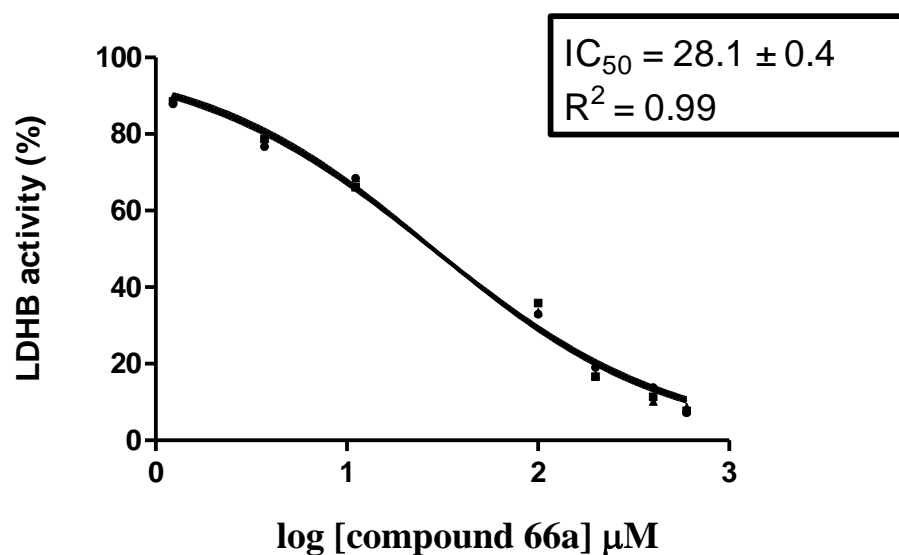

**Figure S193.** *h*LDHB inhibition curve of compound **66a** (mean  $\pm$  SD of  $n = 3$  replicates).

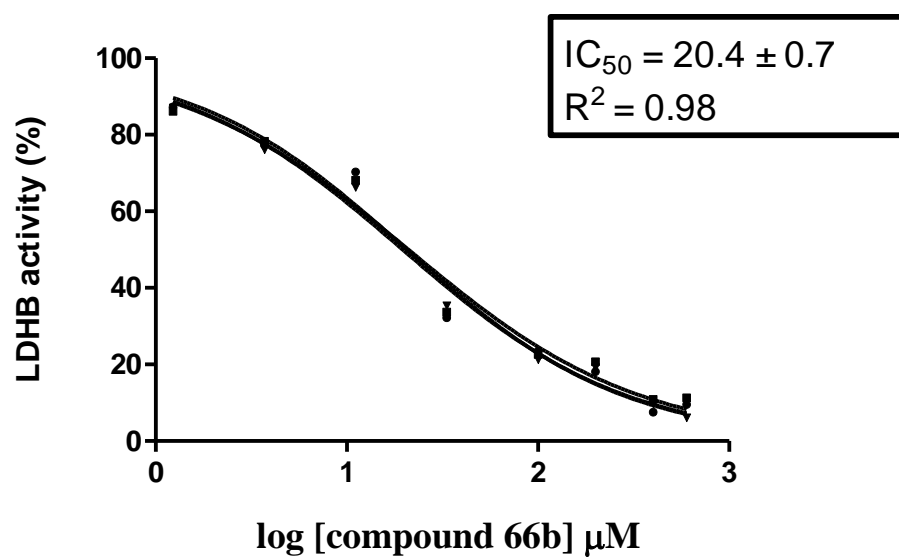

**Figure S194.** *h*LDHB inhibition curve of compound **66b** (mean  $\pm$  SD of  $n = 3$  replicates).

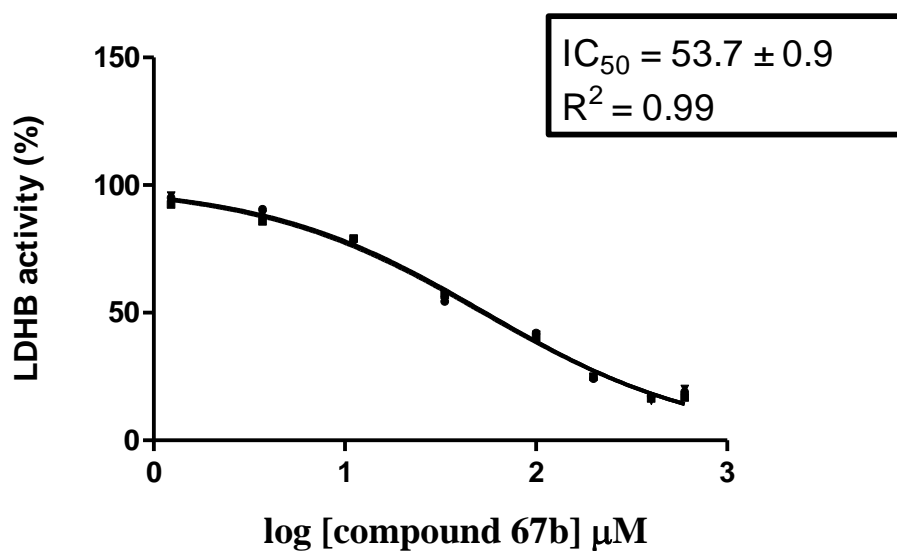

**Figure S195.** *h*LDHB inhibition curve of compound **67b** (mean  $\pm$  SD of  $n = 3$  replicates).

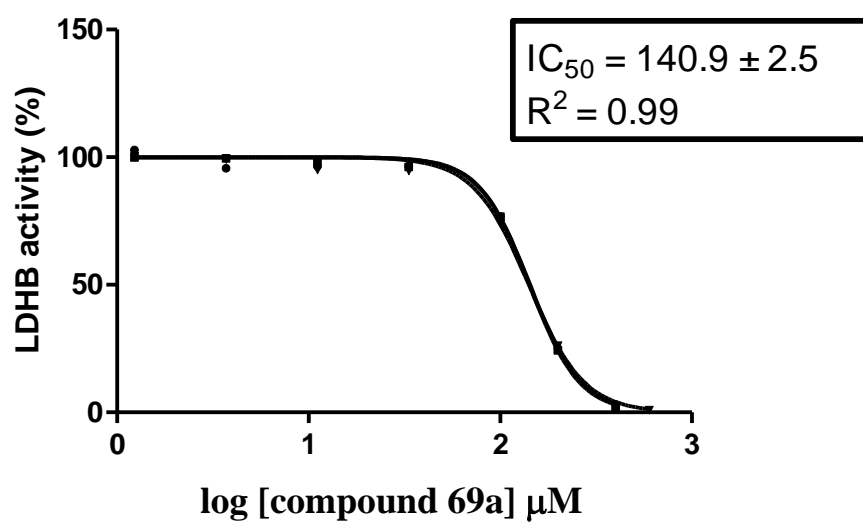

**Figure S196.** *h*LDHB inhibition curve of compound **69a** (mean  $\pm$  SD of  $n = 3$  replicates).

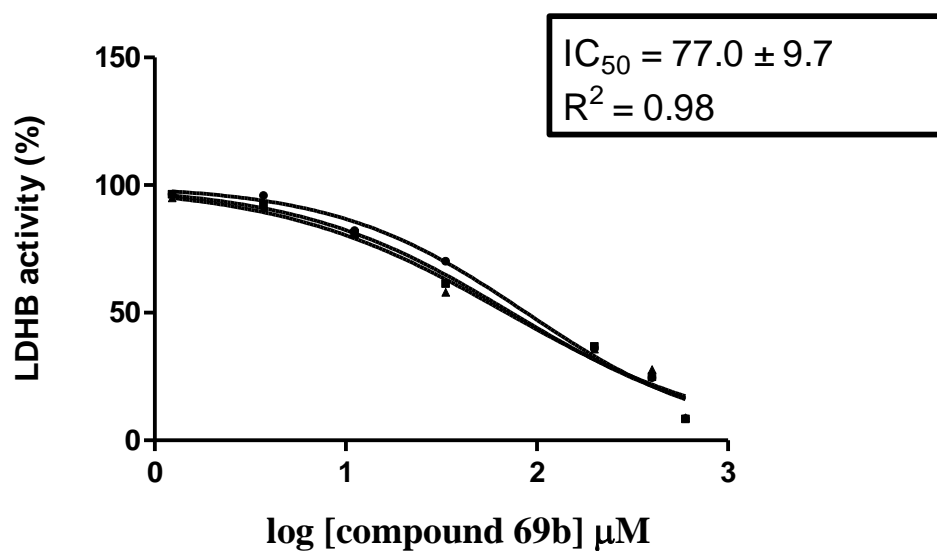

**Figure S197.** *h*LDHB inhibition curve of compound **69b** (mean  $\pm$  SD of  $n = 3$  replicates).

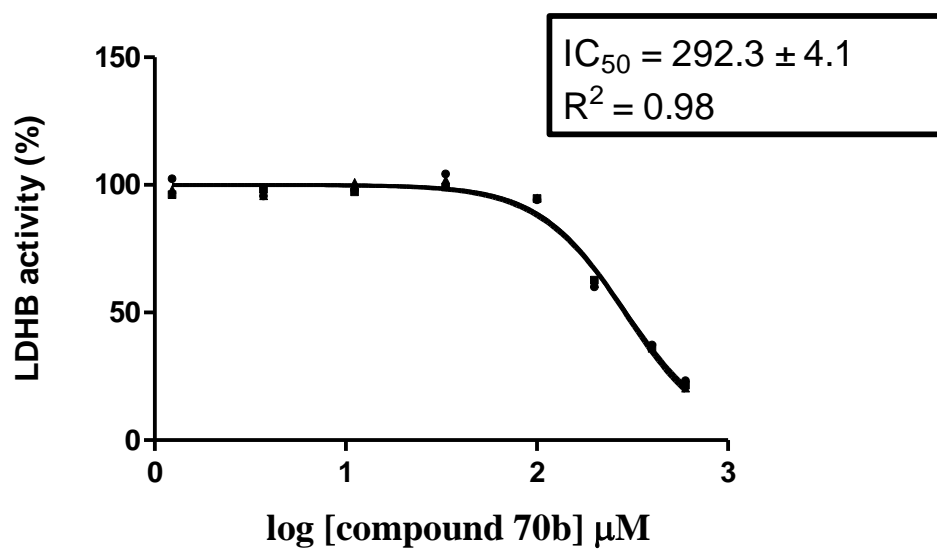

**Figure S198.** *h*LDHB inhibition curve of compound **70b** (mean  $\pm$  SD of  $n = 3$  replicates).



5. Dose response curves against *h*LDHA and *h*LDHB of pure enantiomers

## *h*LDHA

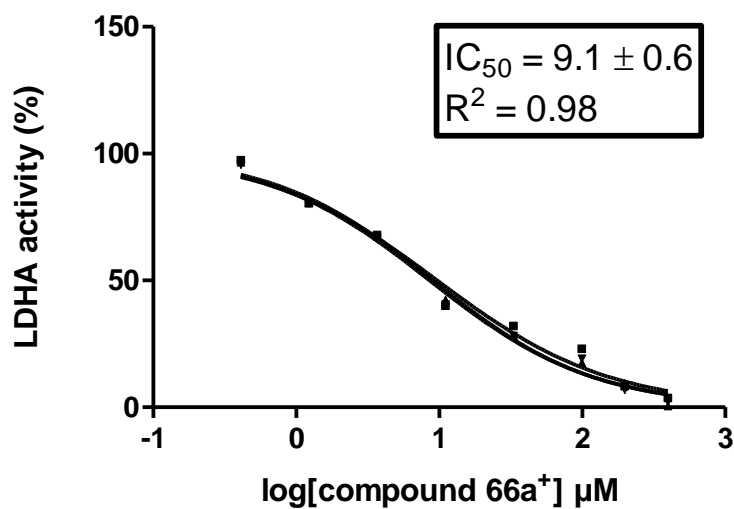

Figure S199. *h*LDHA inhibition curve of compound (+)-66a (mean  $\pm$  SD of  $n = 3$  replicates).

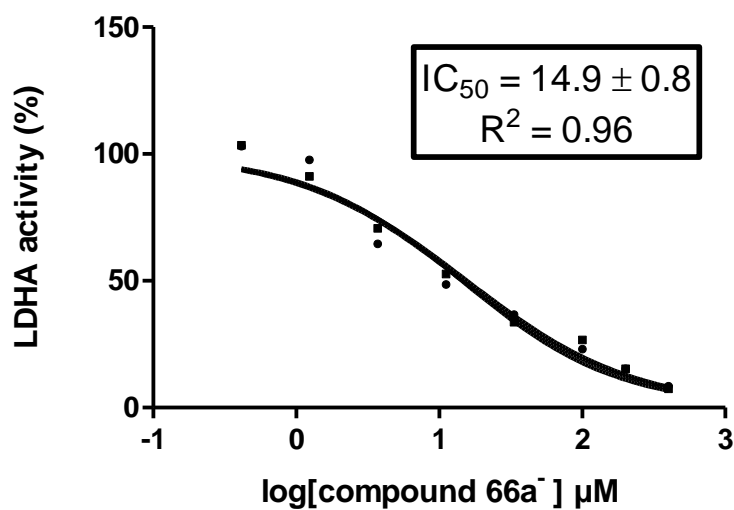

Figure S200. *h*LDHA inhibition curve of compound (-)-66a (mean  $\pm$  SD of  $n = 3$  replicates).

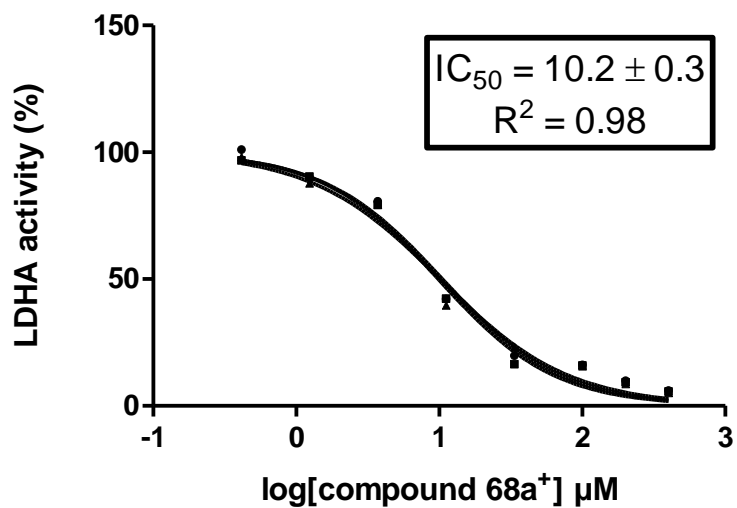

**Figure S201.** *h*LDHA inhibition curve of compound (+)-**68a** (mean  $\pm$  SD of  $n = 3$  replicates).

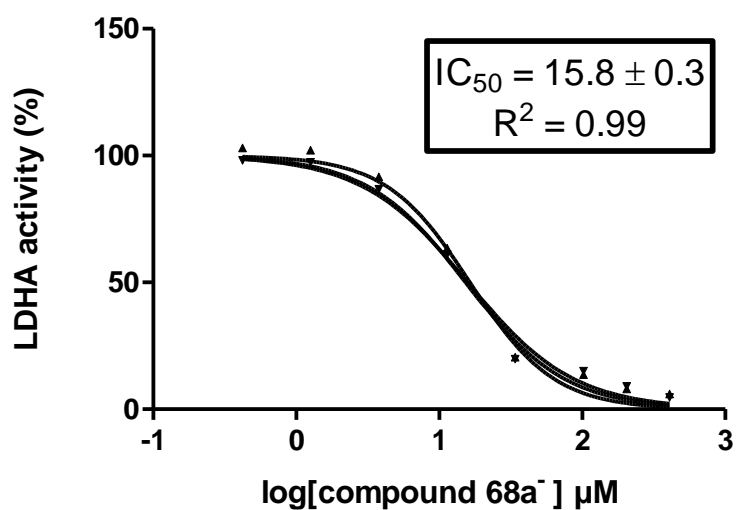

**Figure S202.** *h*LDHA inhibition curve of compound (-)-**68a** (mean  $\pm$  SD of  $n = 3$  replicates).

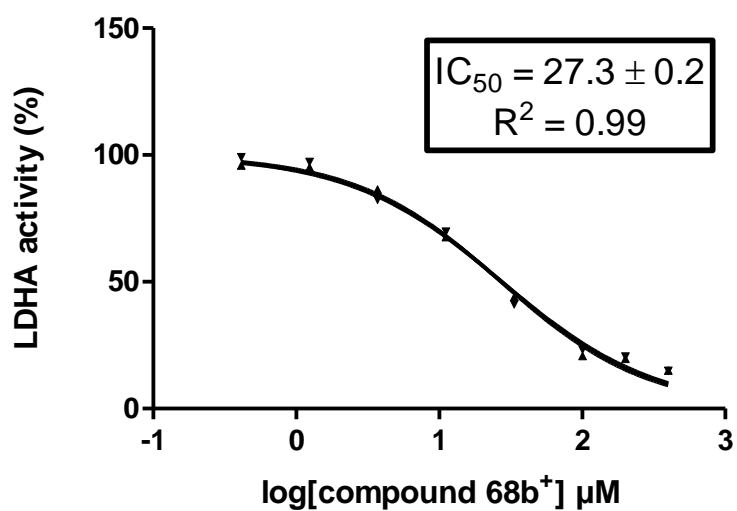

**Figure S203.** *h*LDHA inhibition curve of compound (+)-**68b** (mean  $\pm$  SD of  $n = 3$  replicates).

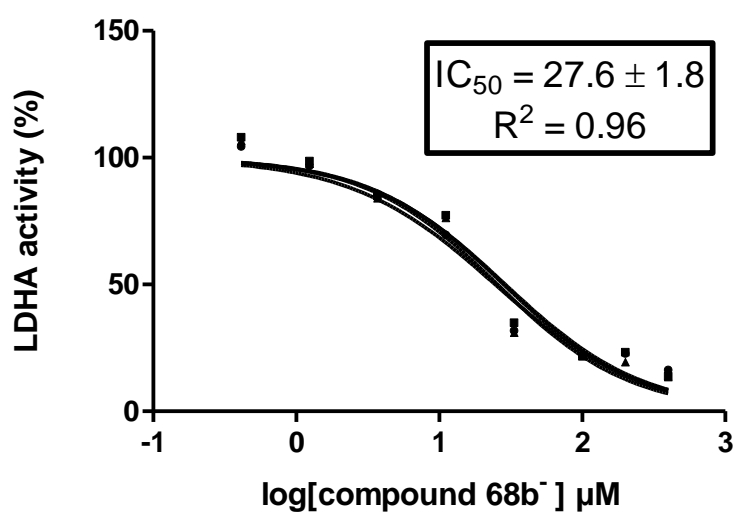

**Figure S204.** *h*LDHA inhibition curve of compound (–)-**68b** (mean  $\pm$  SD of  $n = 3$  replicates)

## *h*LDHB

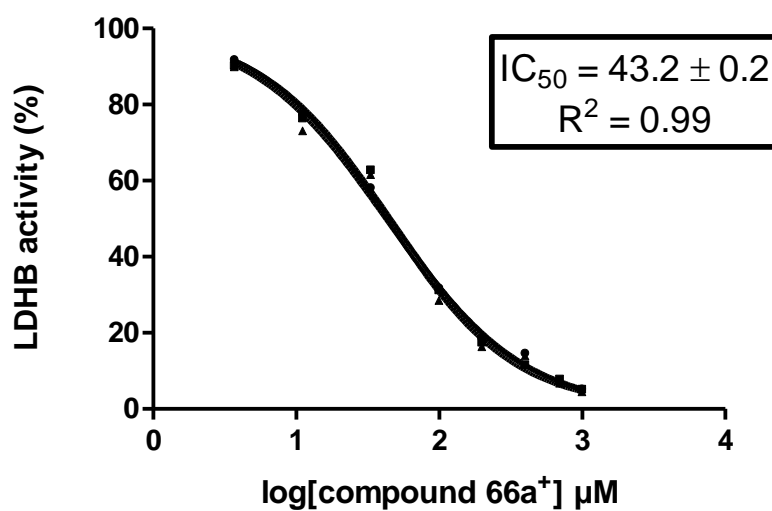

**Figure S205.** *h*LDHB inhibition curve of compound (+)-**66a** (mean  $\pm$  SD of  $n = 3$  replicates).

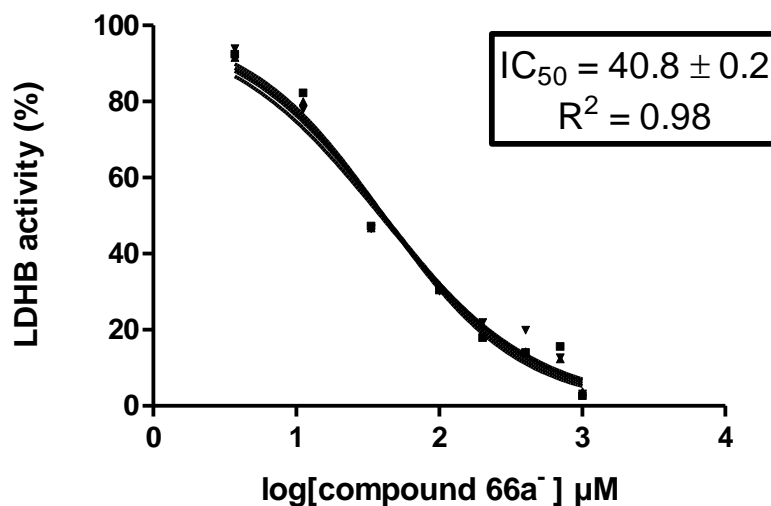

**Figure S206.** *h*LDHB inhibition curve of compound (–)-**66a** (mean  $\pm$  SD of  $n = 3$  replicates).

## 6. Lineweaver-Burk double reciprocal graphs for pure enantiomers on *h*LDHA

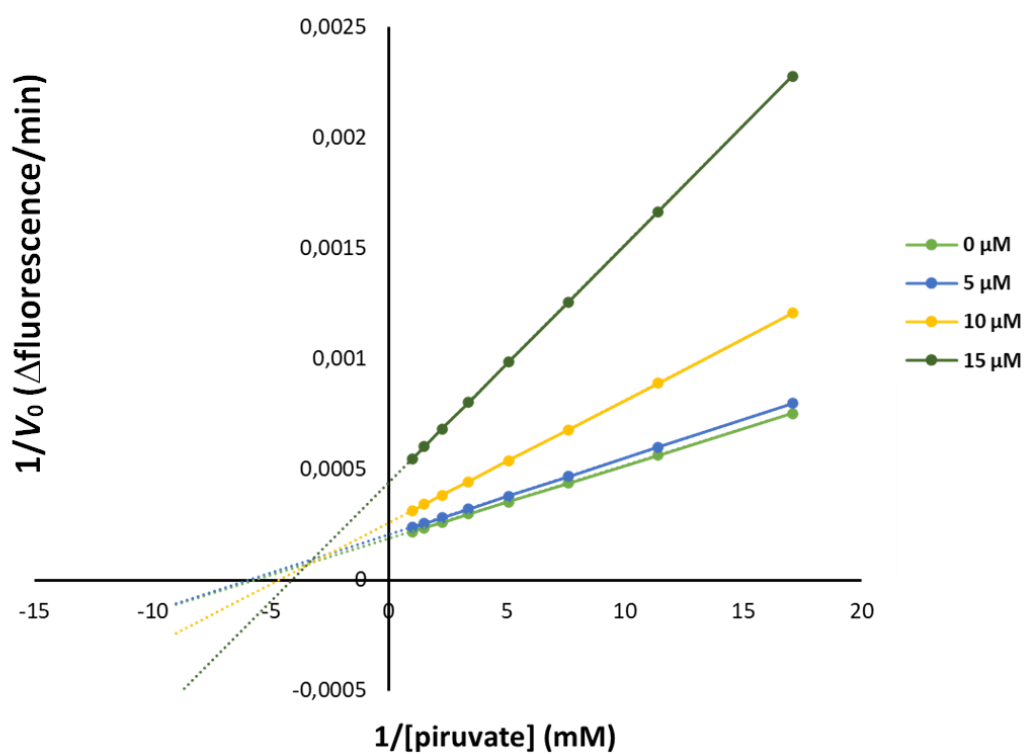

**Figure S207.** Lineweaver-Burk double-reciprocal graphs for (+)-**68a** (mean  $\pm$  SD of  $n = 3$  replicates) on *h*LDHA

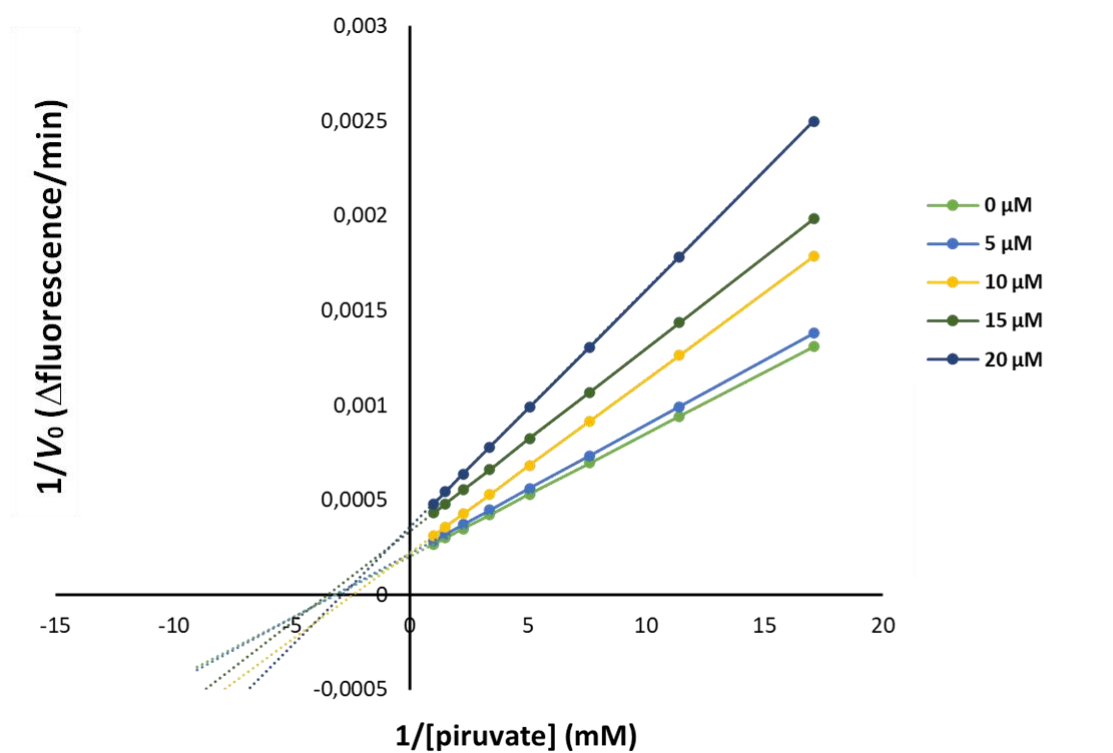

**Figure S208.** Lineweaver-Burk double-reciprocal graphs for (-)-68a (mean  $\pm$  SD of  $n = 3$  replicates) on hLDHA

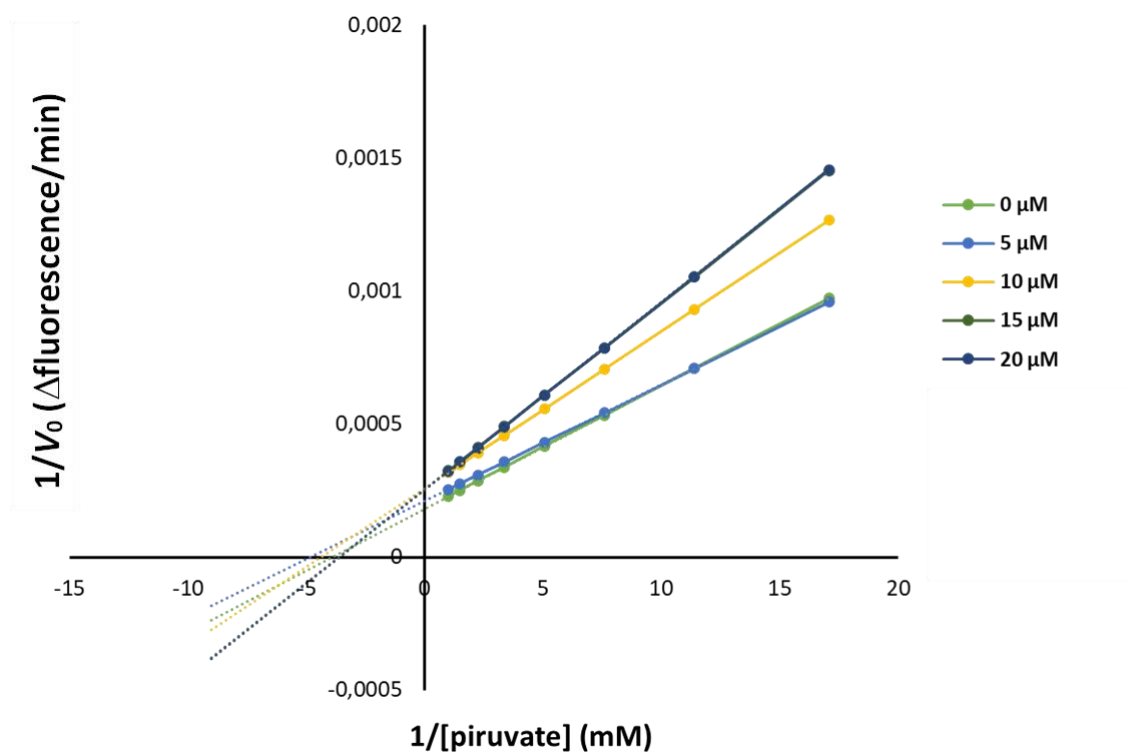

**Figure S209.** Lineweaver-Burk double-reciprocal graphs for (+)-68b (mean  $\pm$  SD of  $n = 3$  replicates) on hLDHA

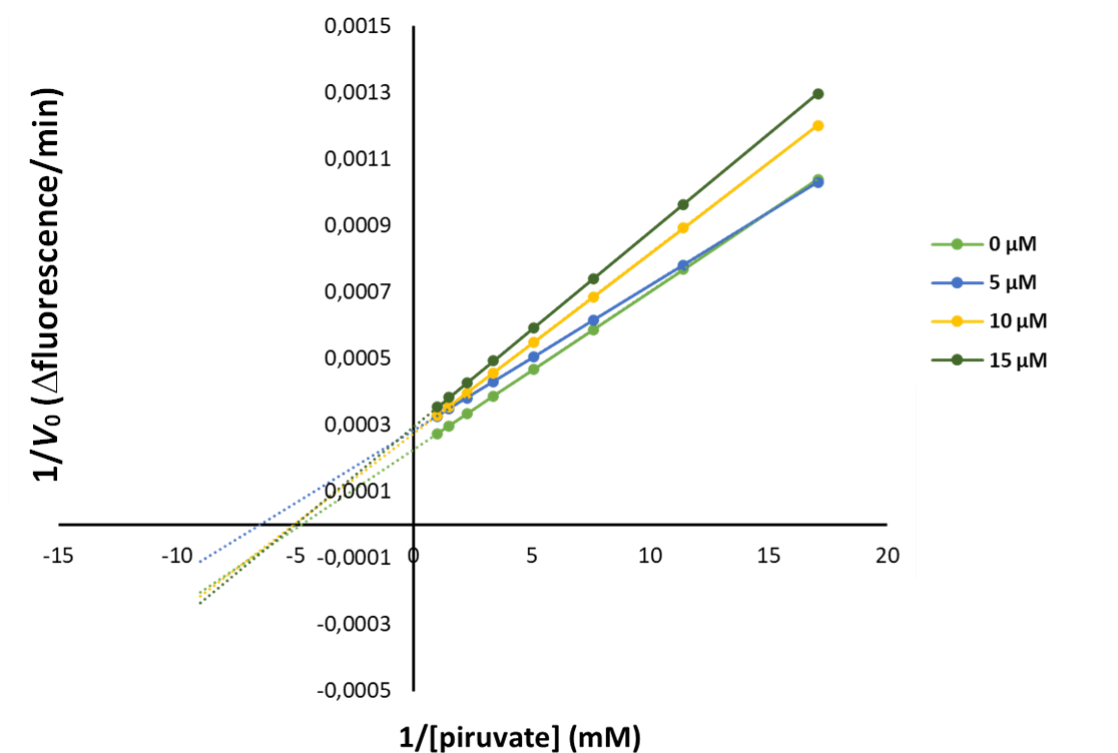

**Figure S210.** Lineweaver-Burk double-reciprocal graphs for (–)-**68b** (mean  $\pm$  SD of  $n = 3$  replicates) on *h*LDHA

## 7. Values of $V_{\max}$ and $K_M$ for pure enantiomers on *h*LDHA

Table S1. Values of  $V_{\max}$  and  $K_M$  calculated for *h*LDHA obtained at each tested concentration of (+)-**68a**

| Inhibitor concentration ( $\mu M$ )     | (+)– <b>68a</b> |      |      |      |
|-----------------------------------------|-----------------|------|------|------|
|                                         | 0               | 5    | 10   | 15   |
| $V_{\max}$ ( $\Delta$ fluorescence/min) | 5374            | 4894 | 3877 | 2269 |
| $K_M$ ( $\mu M$ )                       | 178             | 170  | 215  | 244  |

Table S2. Values of  $V_{\max}$  and  $K_M$  calculated for *h*LDHA obtained at each tested concentration of (–)-**68a**

| Inhibitor concentration ( $\mu M$ )     | (–)– <b>68a</b> |      |      |      |      |
|-----------------------------------------|-----------------|------|------|------|------|
|                                         | 0               | 5    | 10   | 15   | 20   |
| $V_{\max}$ ( $\Delta$ fluorescence/min) | 4916            | 4597 | 4544 | 2982 | 2809 |
| $K_M$ ( $\mu M$ )                       | 318             | 313  | 416  | 288  | 352  |

Table S3. Values of  $V_{\max}$  and  $K_M$  calculated for *h*LDHA obtained at each tested concentration of (+)-**68b**

| Inhibitor concentration ( $\mu M$ )     | (+)– <b>68b</b> |      |      |      |      |
|-----------------------------------------|-----------------|------|------|------|------|
|                                         | 0               | 5    | 10   | 15   | 20   |
| $V_{\max}$ ( $\Delta$ fluorescence/min) | 5498            | 4753 | 3860 | 3932 | 3980 |
| $K_M$ ( $\mu M$ )                       | 255             | 208  | 227  | 276  | 281  |

Table S4. Values of  $V_{\max}$  and  $K_M$  calculated for *h*LDHA obtained at each tested concentration of (–)-**68b**

|                                                     | (–)- <b>68b</b> |          |           |           |
|-----------------------------------------------------|-----------------|----------|-----------|-----------|
| <i>Inhibitor concentration (<math>\mu M</math>)</i> | <b>0</b>        | <b>5</b> | <b>10</b> | <b>15</b> |
| $V_{\max}$ ( $\Delta$ fluorescence/min)             | 4421            | 3528     | 3653      | 3392      |
| $K_M$ ( $\mu M$ )                                   | 210             | 154      | 198       | 199       |
